1 **Integrative transcriptomic analysis of tissue-specific metabolic crosstalk after**  
2 **myocardial infarction**

3 Muhammad Arif<sup>1, #</sup>, Martina Klevstig<sup>2, #</sup>, Rui Benfeitas<sup>3</sup>, Stephen Doran<sup>4</sup>, Hasan Turkez<sup>5</sup>,  
4 Mathias Uhlén<sup>1</sup>, Maryam Clausen<sup>6</sup>, Johannes Wikström<sup>7</sup>, Damla Etal<sup>6</sup>, Cheng Zhang<sup>1</sup>, Malin  
5 Levin<sup>2</sup>, Adil Mardinoglu<sup>1, 4, \*</sup>, Jan Boren<sup>2, \*</sup>

6 <sup>1</sup>Science for Life Laboratory, KTH - Royal Institute of Technology, Stockholm, SE-17121,  
7 Sweden.

8  
9 <sup>2</sup>Department of Molecular and Clinical Medicine, University of Gothenburg, The Wallenberg  
10 Laboratory, Sahlgrenska University Hospital, Gothenburg, Sweden.

11  
12 <sup>3</sup>National Bioinformatics Infrastructure Sweden (NBIS), Science for Life Laboratory,  
13 Department of Biochemistry and Biophysics, Stockholm University, S-10691 Stockholm,  
14 Sweden

15  
16 <sup>4</sup>Centre for Host-Microbiome Interactions, Faculty of Dentistry, Oral & Craniofacial Sciences,  
17 King's College London, London, SE1 9RT, United Kingdom.

18  
19 <sup>5</sup>Department of Medical Biology, Faculty of Medicine, Atatürk University, Erzurum, 25240,  
20 Turkey.

21  
22 <sup>6</sup>Translational Genomics, BioPharmaceuticals R&D, Discovery Sciences, AstraZeneca,  
23 Gothenburg, Sweden.

24  
25 <sup>7</sup>Bioscience Cardiovascular, Research and Early Development, Cardiovascular, Renal and  
26 Metabolism (CVRM), BioPharmaceuticals R&D, AstraZeneca, Gothenburg, Sweden

27  
28 <sup>#</sup>Contributed equally.

29 <sup>\*</sup>Corresponding authors: Adil Mardinoglu and Jan Boren

30 Email: [adilm@scilifelab.se](mailto:adilm@scilifelab.se); [Jan.Boren@wlab.gu.se](mailto:Jan.Boren@wlab.gu.se)

31

32

33 **Abstract/Summary**

34 Myocardial infarction (MI) promotes a range of systemic effects, many of which are  
35 unknown. Here, we investigated the alterations associated with MI progression in heart and  
36 other metabolically active tissues (liver, skeletal muscle, and adipose) in a mouse model of  
37 MI (induced by ligating the left ascending coronary artery) and sham-operated mice. We  
38 performed a genome-wide transcriptomic analysis on tissue samples obtained 6- and 24-hours  
39 post MI or sham operation. By generating tissue-specific biological networks, we observed:  
40 (1) dysregulation in multiple biological processes (including immune system, mitochondrial  
41 dysfunction, fatty-acid beta-oxidation, and RNA and protein processing) across multiple  
42 tissues post MI; and (2) tissue-specific dysregulation in biological processes in liver and heart  
43 post MI. Finally, we validated our findings in two independent MI cohorts. Overall, our  
44 integrative analysis highlighted both common and specific biological responses to MI across a  
45 range of metabolically active tissues.

46

47 **Keywords**

48 Systems biology; network analysis; whole-body modelling; cardiovascular disease;  
49 Myocardial infarction; multi-tissue; metabolically active tissues; liver; adipose; muscle

50

## 51 **Introduction**

52 Cardiovascular disease (CVD) is the leading cause of death worldwide, accounting for more  
53 than 17 million deaths globally in 2016 <sup>1</sup>. Myocardial infarction (MI) is one of the most  
54 common causes of CVD-related death, and is the result of severe coronary artery disease that  
55 develops from tapered arteries or chronic blockage of the arteries caused by accumulation of  
56 cholesterol or plaque (atherosclerosis). MI has been linked to multiple behavioral risk factors  
57 (including unhealthy diet, physical inactivity, excessive use of alcohol, and tobacco  
58 consumption) that can lead to significant alterations in metabolism that are responsible for  
59 hypertension, obesity, diabetes, and hyperlipidemia. These abnormalities are known as the  
60 high-risk factors of MI and CVDs in general.

61  
62 Systems biology has been used in many studies to reveal the underlying molecular  
63 mechanisms of complex human diseases and to answer important biological questions related  
64 to the progression, diagnosis and treatment of the diseases. The use of systems biology has  
65 aided the discovery of new therapeutic approaches in multiple diseases <sup>2-4</sup> by identifying  
66 novel therapeutic agents and repositioning of existing drugs <sup>5</sup>. Systems biology has also been  
67 employed in the identification of novel biomarkers, characterization of patients and  
68 stratification of heterogenous cancer patients <sup>6-8</sup>. Specifically, integrated networks (INs) <sup>8</sup> and  
69 co-expression networks (CNs) <sup>9</sup> have been proven to be robust methods for revealing the key  
70 driver of metabolic abnormalities, discovering new therapy strategies, as well as gaining  
71 systematic understanding of diseases <sup>10,11</sup>.

72  
73 Previously, multiple studies in individual tissues have been performed and provided new  
74 insights into the underlying mechanisms of diseases <sup>12-15</sup>. However, the crosstalk between  
75 different tissues and their dysregulation has not been examined in MI and other CVD-related  
76 complications <sup>16</sup>. Here we performed an integrated analysis of heart and other metabolically  
77 active tissues (liver, skeletal muscle and adipose tissue) using a mouse model of MI. We used  
78 several systems biology approaches to obtain a systematic picture of the metabolic alterations  
79 that occur after an MI (**Figure 1A**), and validated our findings in two independent datasets.

## 80 **Results**

### 81 *Differential expression analysis shows a pronounced effect on gene expression 24 h post* 82 *MI*

83 To study global biological alterations and systemic whole-body effects associated with MI,  
84 we obtained heart, liver, skeletal muscle, and white adipose tissue from mice 6 h and 24 h  
85 after either an MI (induced by ligating the left ascending coronary artery) or a sham operation  
86 (as control). We generated transcriptomics data and identified differentially expressed genes  
87 (DEGs) 6 and 24 h post MI and sham operation in all tissues, with the most significant  
88 differences occurring after 24 h (**Table S1, Figure 1B**). Principal component analysis (PCA)  
89 showed a close clustering between the control (for both time points) and MI (6 h and 24 h  
90 separately) samples for heart tissue but clustering by extraction time points (6 h and 24 h  
91 clusters) for the other tissues (**Figure S1**). We present the transcriptional changes associated  
92 with MI in **Table S1** and the DEGs (FDR < 5%) using an UpSet plot<sup>17</sup> in **Figure 1C**.

93  
94 All tissues showed a more pronounced effect in terms of the number of DEGs 24 h post MI  
95 (**Figure 1C**). As expected, the most affected tissue was the heart (393 DEGs at 6 h, 3318  
96 DEGs at 24 h, and 318 DEGs were the same at both time points). By contrast, 136, 641 and  
97 374 genes were significantly changed in liver, skeletal muscle and adipose tissues 24 h post  
98 MI compared to control, respectively. More than 33% of the DEGs that significantly changed  
99 in the other tissues also changed in the heart (**Figure 1C**). Interestingly, more than 97% of the  
100 shared DEGs between heart and skeletal muscle changed in the same direction, with  
101 corresponding numbers of 88% and 64% in adipose and liver, respectively.

102

### 103 *Functional analysis reveals widespread mitochondrial, fatty acid, immune, and protein and* 104 *RNA-related alterations post MI with liver shows contrasting trend*

105 We performed gene-set enrichment analysis (GSEA) with KEGG pathways (**Table S2,**  
106 **Figure 1D**) and gene ontology (GO) biological processes (BPs) (**Table S3, Figure 2A**) to  
107 identify altered biological functions and pathways 24 h after an MI. Mitochondrial functions  
108 (specifically, mitochondrial translation, respiratory chain and oxidative phosphorylation) were  
109 significantly downregulated in the heart, muscle and adipose tissues but not in the liver.  
110 Processes related to oxidative stress were upregulated in the heart and skeletal muscle. Fatty  
111 acid beta-oxidation was downregulated in the heart and adipose but upregulated in the liver.  
112 Processes and pathways related to immune systems were significantly upregulated in the heart

113 and skeletal muscle but significantly downregulated in liver. Processes associated with protein  
114 and RNA processing, ribosome biogenesis and protein targeting endoplasmic reticulum were  
115 upregulated in all tissues except liver whereas protein processing in endoplasmic reticulum  
116 and RNA transport pathways were upregulated in all tissues.

117 We also observed that liver was showing opposite trends compared to the other tissues in  
118 other important functions, such as fatty acid metabolism and immune response. By checking  
119 regulation at the gene level, we observed that only 16 DEGs in liver showed opposite  
120 regulation compared to the other tissues whereas 97 out of the 136 DEGs in liver were not  
121 DEGs in any other tissues (**Table S4**). Therefore, the differences we observed in liver were  
122 mainly due to different DEGs rather than opposite regulation compared to other tissues.

123

### 124 *Tissue-specific altered biological functions point to specificity of metabolic and signaling* 125 *responses to MI*

126 The functional analysis also indicated that several metabolic pathways (including cholesterol,  
127 ascorbate and aldarate, linoleic acid, and sphingolipid metabolism pathways) and signaling  
128 pathways (including GnRH, FoxO, cAMP and prolactin signaling pathways) were  
129 significantly upregulated in heart 6 h after an MI (**Table S2, Figure S2A**). We also observed  
130 significant down regulation of tryptophan metabolism and upregulation of glycosaminoglycan  
131 biosynthesis in heart 24 h after an MI (**Table S2, Figure S2A**). Processes related to retinol  
132 metabolism were upregulated in heart at both timepoints. Pathways that were previously  
133 associated with cardiac hypertrophy and cardiac remodeling (e.g. JAK-STAT, MAPK,  
134 estrogen, and TNF signaling pathways, and ECM-receptor interaction) were significantly  
135 upregulated in heart 6 and 24 h after an MI (**Figure S1B**).

136

137 Our analysis also indicated significant metabolic differences in adipose tissue 24 h after an MI  
138 (**Figure S2B**). Fructose and mannose metabolism, glyoxylate and dicarboxylate metabolism,  
139 glycolysis/gluconeogenesis, and pentose phosphate pathways, glycine, serine and threonine  
140 metabolism and pyrimidine metabolism, as well as endocrine systems (e.g. insulin signaling  
141 pathway and regulation of lipolysis in adipocytes) were downregulated in adipose tissue.  
142 We observed that the PPAR signaling pathway was upregulated whereas glutathione was  
143 downregulated in liver 24 h post-infarction (**Figure S2B**). We found that sphingolipid  
144 metabolism and immune-related pathways were upregulated in skeletal muscle 24 h post-  
145 infarction (**Figure S2B**).

146

147 ***Reporter metabolite analyses show significant alterations in fatty acid, amino acid, retinol,***  
148 ***and estrogen metabolism post MI***

149 To predict the effect of the transcriptional changes on metabolism, we performed reporter  
150 metabolite analyses (**Table S5**) using the gene-to-metabolites mapping from the Mouse  
151 Metabolic Reaction database<sup>18</sup>; results in each tissue 24 h after MI are shown in **Figure 2B**.  
152 In agreement with our analyses above, reporter metabolites related to oxidative  
153 phosphorylation, such as *ubiquinol*, *ubiquinone*, *NADH* and *NAD+*, were downregulated in all  
154 tissues except liver. Moreover, *linolenoyl-CoA*, *acetyl CoA*, and several other fatty acyl-CoA-  
155 related metabolites were downregulated in heart and adipose tissue but upregulated in liver.  
156 We also found that several *5-S-glutathionyl* metabolite forms, known to be related to  
157 phenylalanine, tyrosine and tryptophan biosynthesis, were downregulated in heart, liver and  
158 skeletal muscle. The same pattern of downregulation was also observed for metabolites  
159 related to estrogen metabolism, specifically metabolites related to oestrone and its glutathione  
160 conjugate derivative. Moreover, *12-keto-LTB4* and *12-oxo-c-LTB3*, related to leukotriene  
161 metabolism, and *hepoxilin A3*, an arachidonic acid, were also found to be downregulated in  
162 heart, liver, and skeletal muscle.

163

164 The liver showed the highest alteration in reporter metabolites, which is attributed to its role  
165 as one of the most metabolically active tissues. We found that several reporter metabolites  
166 related to retinol metabolism, namely *retinal*, *retinol*, *retinoate*, and *all-trans-18-*  
167 *hydroxyretinoic acid*, were significantly downregulated only in liver tissue. Retinol  
168 metabolism has been previously associated with MI<sup>19,20</sup>.

169

170 ***Network analyses unveil universal and tissue-specific clusters and mechanisms post MI***

171 The use of co-expression network (CN) analyses can assist in elucidating the functional  
172 relationships between genes in a specific cell and tissue<sup>9</sup>. Here, we performed CN analysis to  
173 reveal the functional relationship between the DEGs by generating tissue-specific CNs and  
174 selected highly connected genes (the top 5% positively correlated genes that fulfilled FDR <  
175 0.05) (**Table 1**). To better define the structure of the networks, we used the Leiden clustering  
176 algorithm<sup>21</sup> by maximizing the modularity scores (**Figure 3A-D**) and selected the clusters  
177 that include more than 30 genes. Next, we superimposed DEGs 24 h post-infarction onto the  
178 network (**Table S1**) and identified the components of the clusters that were affected by an MI.

179 We also used functional analysis with GO BP and KEGG pathways to understand the specific  
180 functions associated with each cluster by using the Enrichr algorithm (FDR < 0.05)<sup>22,23</sup>. We  
181 summarized the GO BP terms with Revigo (**Table S6**)<sup>24</sup> and checked the average clustering  
182 coefficient to define the centrality of each cluster (**Table S6**)<sup>9</sup>. Among the clusters, we  
183 identified the key clusters as those with the highest average clustering coefficient, allowing us  
184 to identify sets of genes whose time-dependent coordinated changes showed the strongest  
185 relationships.

186

187 Interestingly, key clusters contained genes with similar functionalities including RNA  
188 processing, transports, and RNA metabolic processes in all tissue-specific CNs (**Table S6**). In  
189 addition, we found that the majority of the DEGs associated with those clusters were  
190 significantly upregulated. These observations strengthen the findings of the functional  
191 analysis above (**Figure 2A**) and further highlight how embryonically distinct tissues display  
192 similar functional responses to MI, with the most highly connected groups of genes preserved  
193 between different tissues (**Table S6, Figure 3E**).

194

### 195 *Community detection reveals tissue-specific clusters post MI*

196 We investigated the tissue specificity of each cluster by performing enrichment analysis with  
197 data from the Mouse Gene Atlas<sup>25</sup>, which involved counting the number of tissue-specific  
198 genes.

199

200 The heart network showed the highest number of tissue-specific genes in cluster Heart-3 (302  
201 genes). Based on DEG analysis, we found that 522 genes were downregulated and 192 genes  
202 were upregulated in the cluster. The enriched GO BP terms in the cluster were mitochondrial  
203 transport, protein processing and respiratory chain, cardiac muscle cell action potential,  
204 response to muscle stretch, and heart contraction (**Figure 3F**). We observed that the results of  
205 the KEGG pathway enrichment analysis were consistent with those obtained from GO BP  
206 analysis (**Table S6**).

207

208 In the liver network, cluster Liver-2 showed the highest tissue specificity (479 genes). In this  
209 cluster, we found that 15 genes were significantly downregulated and 17 genes were  
210 significantly upregulated. Based on GO BP enrichment analysis, the genes in this cluster were  
211 associated with cholesterol metabolism and homeostasis, lipid transport, glutathione

212 metabolism, lipoprotein metabolism, and glucose 6-phosphate metabolism (**Table S6**). KEGG  
213 enrichment analysis also showed that the genes in the cluster were related to retinol,  
214 carbohydrate, lipid and amino-acid metabolism (**Table S6**).

215  
216 The muscle network had two clusters with high tissue specificity: cluster Muscle-4 (276  
217 genes) and Muscle-5 (143 genes). Muscle-4 showed association with GO BP terms such as  
218 mitochondrial transport, protein processing and respiratory chain, response to muscle stretch,  
219 and muscle contraction (**Table S6**). In contrast, the KEGG pathway in this cluster showed  
220 relation to glycolysis/glucogenesis, propanoate metabolism, glyoxylate and dicarboxylate  
221 metabolism, and several signaling pathways (e.g. oxytocin, glucagon, cGMP-PKG and HIF-1)  
222 (**Table S6**). Muscle-5 was enriched in GO BP terms associated with protein  
223 dephosphorylation, muscle contraction and intracellular protein transport (**Table S6**). We also  
224 found that insulin, MAPK and Wnt signaling pathways were associated to Muscle-5 from the  
225 KEGG enrichment analysis (**Table S6**).

226  
227 The adipose tissue network showed tissue specificity in cluster Adipose-2 (33 genes), which  
228 is associated with GO BP processes including mRNA processing, regulation of mitotic cell  
229 cycle phase, ribosome biogenesis, and viral processes (**Table S6**). We observed that the  
230 results of the KEGG pathway enrichment analysis were consistent with those obtained from  
231 GO BP analysis, with additional associations with multiple signaling and regulatory pathways  
232 (**Table S6**).

233

### 234 *Tissue-specific clusters show important tissue-specific changes post MI*

235 To understand the specific behavior of each tissue, we further studied the tissue-specific  
236 clusters in the CNs (**Figure 4A**). Heart specific cluster, Heart-3, was driven by several central  
237 genes including *Pln*, *Pde4b*, and *Atp2a2* (related to regulation of cardiac muscle contraction)  
238 and *Pdha1* and *Vdac1* (related to mitochondrial functions). These genes were also found to be  
239 significantly differentially expressed in heart 24 hours post MI (**Table S1**). Genes in the  
240 heart-specific cluster were related to multiple other processes/pathways, e.g. oxytocin  
241 signaling pathway, and several metabolic pathways (glycogen, inositol phosphate and purine)  
242 (**Table S6**).

243



244 Mitochondrial dysfunction in the heart leads to disturbance of energy (ATP) production<sup>26,27</sup>  
245 and, in the presence of oxygen, to accumulation of reactive oxygen species (ROS), which can  
246 cause oxidative stress. *Vdac1*, a key gene for regulation of mitochondria function and one of  
247 the central genes in the heart-specific cluster (see above), is significantly downregulated in MI  
248<sup>28</sup>. *Vdac1* is located in the outer mitochondrial membrane and is involved directly in  
249 cardioprotection<sup>29</sup> within the cGMP/PKG pathway (**Figure S3A**). In the same pathway, we  
250 also observed down-regulation of the reporter metabolite hydrogen peroxide (**Table S5**), a  
251 ROS that is related to cardioprotection<sup>29,30</sup>. We also observed downregulation of *Pdhal*,  
252 which is known to have a substantial role in both the HIF-1 signaling pathway and the  
253 pyruvate metabolism pathway that converts pyruvate to acetyl-CoA in the mitochondria  
254 (**Figure S3B**). Acetyl-CoA is used in the TCA cycle to produce NADH and FADH<sub>2</sub>, which  
255 are both needed for ATP production and were downregulated in our reporter metabolite  
256 analysis of the heart. Our findings are thus consistent with dysfunctional mitochondria and  
257 ATP production in the heart in response to an MI. *Pdhal* has been also been linked to the  
258 heart sensitivity during to ischemic stress, where its deficiency can compromise AMP-  
259 activated protein kinase activation<sup>31</sup>.

260  
261 In skeletal muscle and adipose tissue, we found that central genes in their respective tissue-  
262 specific clusters related to fatty acid metabolism and lipid metabolism were significantly  
263 altered (**Table S6, Figure 5**). In liver-specific cluster, we found that their central genes were  
264 related to fatty-acid beta oxidation (*Cyp4a31*, *Cyp4a32*) and glutathione metabolism (*Gstm3*)  
265 (**Table S6, Figure 5A**). Alterations of fatty acid beta-oxidation and glutathione metabolism  
266 have previously been reported in non-alcoholic fatty liver disease, a known risk factor of  
267 CVD<sup>32,33</sup>. Moreover, in liver, we also found that retinol metabolism was uniquely related to  
268 genes in the liver-specific cluster, mainly driven by four significantly differentially expressed  
269 central genes of the clusters, i.e. *Cyp26a1*, *Cyp4a31*, *Cyp4a32*, and *Hsd17b6* (**Table S6**). A  
270 previous study showed that mortality from CVD in older individuals was accompanied by  
271 impaired liver ability to store retinol<sup>19</sup>.

272

### 273 ***Multi-tissue modeling reveals key metabolic pathways affected post MI***

274 To investigate the metabolic responses to MI in and across tissues in the mice, we constructed  
275 a multi-tissue genome-scale metabolic model. The model consisted of five tissue-specific  
276 genome scale metabolic models, namely heart, liver, skeletal muscle, adipose, and small

277 intestine. The small intestine model (for which we do not have transcriptomic data) was added  
278 to include ingestion and conversion of dietary nutrients into chylomicrons, which are directly  
279 secreted into blood and transport lipids to other tissues<sup>18</sup>. The final mouse multi-tissue model  
280 included 19,859 reactions, 13,284 metabolites, 7,116 genes and 41 compartments. We  
281 predicted the metabolic fluxes in mice 24 h after an MI or sham operation by integrating the  
282 dietary input, tissue-specific resting energy expenditure and transcriptomics data.

283  
284 The modeling showed that oxygen uptake, carbon dioxide production and the oxidative  
285 phosphorylation pathway in heart, adipose and skeletal muscle were decreased in MI mice, in  
286 agreement with the downregulation of oxidative phosphorylation we observed in these tissues  
287 (**Table S7**). By contrast, liver showed slightly increased oxygen uptake, which might due to  
288 the slightly (not statistically significant) upregulated oxidative phosphorylation (**Table S7**).  
289 These findings indicate that the changes in oxygen and carbon dioxide fluxes and the  
290 oxidative phosphorylation pathway could serve as a positive control for predicting the  
291 changes due to MI in the fluxes.

292  
293 Next, we investigated the tissue-specific metabolic flux changes in the same model (**Table**  
294 **S7**). We found that the pentose phosphate pathway was upregulated in heart 24 hours post MI,  
295 consistent with upregulated glucose metabolism after an MI. Elevated glycolysis could allow  
296 the heart to rapidly generate energy under stress conditions, and the enhanced pentose  
297 phosphate pathway could increase the NADPH level, which could help maintain the level of  
298 reduced glutathione in heart<sup>34</sup>. We also found that adipose tissue secreted more ketone  
299 bodies, including acetoacetate and butyrate, into plasma; the plasma level of ketone bodies  
300 has been reported as a stress marker in acute MI<sup>35</sup>. Notably, relatively small metabolic  
301 changes were found in liver and skeletal muscle, which is probably due to the small number  
302 of transcriptomic changes in metabolic pathways in these tissues.

303

### 304 *Validating our findings with publicly available datasets*

305 We validated our observations in heart tissue in two independent cohorts of bulk RNA-seq  
306 data from mouse heart (**Table S8**). We filtered both validation cohorts to get and analyzed  
307 only 24 hours post-MI data. We found that there were 2169 DEGs in heart 24 h after  
308 infarction from our data were validated in at least one of the independent cohorts (959 in  
309 both) (**Figure 6A**). We also found that 109 out of the 123 most connected genes in our heart-

310 specific cluster were also significantly differentially expressed in at least one of the  
311 independent cohorts (81 in both). By performing functional analysis of the validation cohorts,  
312 we found that ~61% of GO BP and 84% of KEGG pathways identified in our analysis of the  
313 heart were also present in at least one of the validation cohorts 24 h after infarction (**Figure**  
314 **6B-C**). In both cohorts, we observed downregulation of mitochondrial functions and fatty acid  
315 metabolism processes. We also observed upregulation of processes and pathways related to  
316 retinol metabolism and inflammatory response in both validation cohorts.

317

### 318 *Identification of driver genes in MI*

319 We observed that *Flnc*, *Lgals3*, *Prkaca* and *Pprc1* showed important response to MI. These  
320 genes were 4 of 16 genes that were DEGs in at least three tissues and validated in both  
321 validation cohorts (**Table S9**). *Flnc*, *Lgals3* and *Pprc1* were upregulated in heart, skeletal  
322 muscle, and adipose, whereas *Prkaca* was downregulated in these three tissues. We further  
323 retrieved their neighbors at each tissue specific CNs, showed their regulations from  
324 differential expression results, and performed functional analysis in **Table S9**.

325

326 *Flnc*, which encodes filamin-C, was part of heart and skeletal muscle-specific CN cluster  
327 (**Figure S4**). Its neighbor genes were found to be significantly (FDR < 0.05) associated to  
328 several functions, including TCA cycle, pyruvate metabolism, glycolysis pathway, and  
329 involved in mitochondrial functions. Specifically, they were related to heart-specific  
330 processes in heart, VEGF signaling pathway in muscle, carbohydrate metabolism in adipose,  
331 and to MAPK signaling pathway and muscle contraction in heart and muscle.

332

333 *Lgals3* (encodes galectin-3) and *Prkaca* were among the most central genes in central clusters  
334 (**Table S6**). The neighbors of *Lgals3* were significantly related to cell cycle and protein  
335 digestion and absorption pathway in all tissues, and to RNA and mRNA related-processes in  
336 muscle and adipose tissue. The neighbors of *Prkaca* were related to insulin signaling pathway  
337 in heart and adipose, and several mitochondrial functions in adipose. *Pprc1* was part of most  
338 central clusters in heart and adipose tissue CN, and its neighbors were related to ribosomal  
339 RNA processing and ribosome biogenesis.

340

## 341 Discussion

342 CVD has a complex etiology and is responsible for a range of systemic effects, hindering our  
343 understanding of its consequences on different tissues. Here, we took advantage of the  
344 technological advances in high-throughput RNA-seq and applied integrative network analyses  
345 to comprehensively explore the underlying biological effects of MI. Specifically, we  
346 generated RNA-seq data from heart, liver, skeletal muscle and adipose tissue obtained from  
347 mice 6 and 24 h after an MI or sham operation. We used transcriptomics data analyses  
348 (differential expression, functional analysis, and reporter metabolites analysis) to determine  
349 the systemic effects of the MI across multiple tissues. Moreover, we performed CN analyses  
350 to pinpoint important key and tissue-specific clusters in each tissue, and identified the key  
351 genes in each cluster. Finally, we used a whole-body modelling approach to identify the  
352 crosstalk between tissues and reveal the global metabolic alterations, before finally validating  
353 our findings with publicly available independent MI cohorts.

354  
355 Based on our analyses, we observed downregulation of heart-specific functions and  
356 upregulation of lipid metabolism and inflammatory response in heart, muscle, and adipose  
357 tissue after an MI (**Figure 4B**). Liver showed a distinct response with respect to the other  
358 three tissues, including downregulation of inflammatory response. We observed that fatty acid  
359 metabolism was downregulated in heart and adipose tissue, whereas fatty acid beta-oxidation  
360 was upregulated and glutathione metabolism was downregulated in liver. We also observed  
361 upregulation of oxidative stress in heart and skeletal muscle. We also observed  
362 downregulation of mitochondrial functions in heart, muscle, and adipose tissue. Furthermore,  
363 we found upregulation of retinol metabolism in heart and downregulation of retinol  
364 metabolites in liver (**Figure 4B**).

365  
366 We hypothesized that downregulation of fatty acid metabolism from adipose tissue was due to  
367 exchange of fatty acids with other tissues (liver and muscle) (**Figure 4B**). We also observed  
368 the flow of retinol from liver to heart during MI, consistent with previous reports<sup>20</sup>. These  
369 MI-associated alterations lead to dysfunctional mitochondria and decreased energy  
370 production, especially in heart and skeletal muscle.

371

372 We also validated our results with publicly available MI datasets generated in separate  
373 independent studies. The validation results strengthened our findings on the altered  
374 functions/pathways and the important heart-specific genes after an MI.

375  
376 Importantly, our analyses of gene clusters highlighted multiple key genes in the response to  
377 MI in different tissues. Specifically, we observed that *Flnc*, *Prkaca*, *Lgals3*, and *Pprcl*  
378 showed important responses in heart, skeletal muscle, and adipose tissue. *Flnc* is involved in  
379 actin cytoskeleton organization in heart and skeletal muscle, and previous studies have shown  
380 that this gene has critical role in CVD <sup>36,37</sup>. Similarly, *Prkaca*, an important metabolic gene,  
381 has also been shown to play an important function during CVD <sup>38-40</sup>. *Lgals3*, related to acute  
382 inflammation response, has been studied intensively in recent years as a key gene in CVD,  
383 and as a potential CVD therapy target <sup>41,42</sup>. Lastly, *Pprcl*, as important regulator of  
384 mitochondrial biogenesis, has not been explored for its direct relationship with CVD;  
385 however, mitochondrial biogenesis appears to be an important response to CVD <sup>43-45</sup>.

386  
387 We recognized several limitations to be noted on this research. First, only transcriptomic data  
388 was analyzed in this research, hence the sensitivity might be limited especially for short  
389 timepoint, e.g. 6 hours after MI. Second, we focused our analysis in this research only on  
390 protein-coding genes. Third, to explore more about the shift in metabolism due to MI, longer  
391 timepoints needs to be explored. This opens new opportunities for future research, including  
392 analyzing the non-protein-coding gene signatures and longer timepoints.

393  
394 In summary, we systematically unveiled the deregulation of biological processes and  
395 pathways that resulted from MI in heart, liver, muscle, and adipose tissue by integrating  
396 transcriptomic data and the use of biological networks. We also identified the key clusters and  
397 central genes using generated tissue-specific CNs. In this study, we demonstrated a strategy to  
398 utilize multi-tissue transcriptomic data to identify alteration of biological processes and  
399 pathways to systemically explore the effect of a disease.

400

#### 401 **Author Contribution**

402 MK performed the animal experiments, MA performed the computational analysis and  
403 analyzed the clinical data together with RB, SD, HT, MU, MC, JW, DE, CZ, AM, and JB

404 coordinated the generation of the clinical data. MA, MK, AM and JB wrote the paper and all  
405 authors were involved in editing the paper.

406

407 **Acknowledgements**

408 This work was financially supported by the Knut and Alice Wallenberg Foundation, Swedish  
409 Research Foundation and Swedish Heart-Lung Foundation.

410

411 **Conflict of Interest**

412 JW, MC, DE are employees at AstraZeneca. The other authors declare no conflict of interest.

413

## 414 **Material and Methods**

### 415 ***Induction of MI***

416 10-week-old male C57Bl/6N mice were fasted for 4 h before induction of myocardial  
417 infarction. The mice were then anesthetized with isoflurane, orally intubated, and connected  
418 to a small-animal ventilator (SAR-830, Geneq, Montreal, Canada) distributing a mixture of  
419 oxygen, air and 2–3% isoflurane. ECG electrodes were placed on the extremities, and cardiac  
420 rhythm was monitored during surgery. An incision was made between the 4th and 5th ribs to  
421 reveal the upper part of the anterior left ventricle (LV) wall and the lower part of the left  
422 atrium. Myocardial infarction was induced by ligating the left anterior descending (LAD)  
423 coronary artery immediately after the bifurcation of the left coronary artery 1. The efficacy of  
424 the procedure was immediately verified by characteristic ECG changes, and akinesis of the  
425 LV anterior wall. After verification of the infarction, the lungs were hyperinflated, positive  
426 end-expiratory pressure was applied, and the chest was closed. Sham mice were handled  
427 identically, but no ligation of the LAD coronary artery was performed (and thus, no ischemia  
428 was induced in these mice). The mice received an intraperitoneal injection of 0.1 ml  
429 buprenorphine to relieve postoperative pain and were allowed to recover spontaneously after  
430 stopping isoflurane administration. Mice were killed with an overdose of isoflurane 6 h or 24  
431 h after occlusion or sham operation. We collected the left ventricle (the whole left ventricle  
432 containing mainly infarcted tissue) of the heart, whereas white adipose tissue (WAT) was  
433 collected from the abdomen and musculus soleus was taken as the muscle tissue. Mouse  
434 hearts and biopsies from the liver, muscle and WAT were snap-frozen in liquid nitrogen and  
435 stored at -80°C until analysis. All mice studies were approved by the local animal ethics  
436 committee and conform to the guidelines from Directive 2010/63/EU of the European  
437 Parliament on the protection of animals used for scientific purposes.

438

### 439 ***Echocardiography in mice***

440 Echocardiographic examination, using VisualSonics VEVO 2100 system (VisualSonics Inc,  
441 Ontario, Canada), which includes an integrated rail system for consistent positioning of the  
442 ultrasound probe was performed 6 and 24 h after an MI to determine the size of the MI. We  
443 calculated infarct size based on wall motion score index (WMSI) 24 h after myocardial  
444 infarction by a 16-segments model on 3 short axis images, as 0 for normal, ½ for reduced wall  
445 thickening and excursion in a segment and 1 for no wall thickening and excursion in a segment.  
446 WMSI was calculated as the sum of scores divided by the total number of segments. Hair

447 removal gel was applied to isoflurane-anesthetized (1.2%) mice chest to minimize resistance  
448 to ultrasonic beam transmission. The mice were then placed on a heating pad and extremities  
449 were connected to an ECG. A 55 MHz linear transducer (MS550D) was used for imaging. An  
450 optimal parasternal long axis (LAX) cine loop of >1000 frames/s was acquired using the ECG-  
451 gated kilohertz visualization technique. Parasternal short axis cine-loops were acquired at 1, 3,  
452 and 5 mm below the mitral annulus. Infarct size was calculated based on wall motion score  
453 index 6 and 24 hours after myocardial infarction by a 16-segments model on LAX and 3 short  
454 axis images view, as 0 for normal, ½ for reduced wall thickening and excursion in a segment  
455 and 1 for no wall thickening and excursion in a segment. The data were evaluated using  
456 VevoStrain™ software system (VisualSonics Inc, Ontario, Canada).

457

#### 458 ***RNA extraction and sequencing***

459 Total RNA was isolated from homogenized heart tissue using RNeasy Fibrous Tissue Mini Kit  
460 (Qiagen). cDNA was synthesized with the high-capacity cDNA Reverse Transcription Kit  
461 (Applied Biosystems) and random primers. mRNA expression of genes of interest was analyzed  
462 with TaqMan real-time PCR in a ViiA™ 7 system (Applied Biosystems). RNA sequencing  
463 library were prepared with Illumina RNA-Seq with Poly-A selections. Subsequently, the  
464 libraries were sequenced on NovaSeq6000 (NovaSeq Control Software 1.6.0/RNA v3.4.4) with  
465 a 2x51 setup using ‘NovaSeqXp’ workflow in ‘S1’ mode flow cell. The Bcl was converted to  
466 FastQ by bcl2fastq\_v2.19.1.403 from CASAVA software suite (Sanger/phred33/Illumina 1.8+  
467 quality scale).

468

#### 469 ***RNA-sequencing data analysis***

470 The raw RNA-sequencing results were processed using Kallisto<sup>46</sup> with index file generated  
471 from the Ensembl mouse reference genome (Release-96)<sup>47</sup>. The output from Kallisto, both  
472 estimated count and TPM (Transcript per kilobase million), were subsequently mapped to gene  
473 using the mapping file retrieved from Ensembl BioMart website, by filtering only protein  
474 coding genes and transcripts. Genes with mean expression less than 1 TPM in each condition  
475 were filtered. For data exploration, we used PCA from sklearn package<sup>48</sup> in Python 3.7 and  
476 used TPM values as the input.

477 Subsequently, we performed differential gene expression analysis using DESeq2 package in  
478 R. We utilized the capabilities from DESeq2 to normalize the rounded estimated count data  
479 and to correct for confounding factors (such as time). To define a gene as differentially



480 expressed (DEGs), a gene has to fulfill a criterion of  $FDR < 5\%$ . The results of differential  
481 expression analysis were then used for functional analysis.

482

483 We checked the tissue specificity of the DEGs in each tissue with the data from Mouse Gene  
484 Atlas <sup>25</sup>. For all the tissue-specific genes, we also checked their human-homolog genes in the  
485 human secretome database <sup>49</sup>.

486

### 487 ***Functional analysis***

488 We performed functional analysis using the R package PIANO <sup>50</sup>. As the input, we used the  
489 fold changes and p-values from the DESeq2, and also GO BP and KEGG pathways gene-set  
490 collections from Enrichr <sup>22,23</sup>, and metabolites from Mouse Metabolic Reaction database <sup>18</sup>.

491 To define a process or pathway as significant, we used a cut off of  $FDR < 5\%$  for the distinct  
492 direction of PIANO (both up and down).

493

### 494 ***Co-expression network generation***

495 We generated the co-expression network by generating gene-gene Spearman correlation ranks  
496 within a tissue type, using *spearmanr* function from SciPy <sup>51</sup> in Python 3.7. Using the same  
497 environment, we performed multiple hypothesis testing using Benjamini-Hochberg method  
498 from *statsmodels* <sup>52</sup>. Correlation data were filtered with criterion of adjusted p-value  $< 5\%$ .

499

500 The top 5% of filtered correlation results were then loaded into iGraph module <sup>53</sup> in Python  
501 3.7 as an unweighted network. To find the subnetworks, we employed the Leiden clustering  
502 algorithm <sup>21</sup> with *ModularityVertexPartition* method. Each cluster was analyzed by using  
503 Enrichr <sup>22,23</sup> to get the enriched GO BP and KEGG pathways. Criterion  $FDR < 0.05$  were used  
504 to find the significantly enriched terms. Clusters with less than 30 genes were discarded, to be  
505 able to get significant functional analysis results. Since GO BP was relatively sparse, we used  
506 Revigo <sup>24</sup> to summarize the GO BP into a higher level. Revigo was further employed to build  
507 a GO BP network. Clustering coefficient was calculated based on the average local clustering  
508 coefficient function within iGraph.

509

## 510 *Multi-tissue metabolic modeling*

511 We combined tissue-specific models (of heart, liver, muscle, adipose and small intestine)  
512 constructed previously<sup>18</sup> in a multi-tissue model by adding an additional compartment  
513 representing the plasma, which allows the exchange of metabolites among different tissues.  
514 Blocked reactions that could not carry fluxes (and the unused metabolites and genes linked to  
515 these reactions) were removed from the models. In addition, the dietary input reactions and  
516 constraints were added to the small intestine model to simulate the food intake (**Table S7**).  
517 Specifically, we assumed that the mice weighed 30 g and consumed 4.5 g chow diet per day  
518 (15 g/100 g body weight) based on a previous study<sup>54</sup>. We also calculated the tissue-specific  
519 resting energy expenditures and set them as mandatory metabolic constraints based on  
520 previous studies and resting energy expenditure for other tissues was incorporated by  
521 including a mandatory glucose secretion flux out from the system with the lower bound  
522 calculated based on ATP (**Table S7**)<sup>54</sup>.

523  
524 To simulate the metabolic flux distribution in the sham-operated mice, we set the lipid droplet  
525 accumulation reaction in adipose tissue (m3\_Adipose\_LD\_pool) as the objective function so  
526 that the energy additional to the resting energy expenditure will be stored as fat; we used  
527 parsimonious FBA to calculate the flux distribution. To simulate the flux distribution after an  
528 MI, we used the previously developed method Relative Metabolic Difference ver. 2  
529 (RMetD2)<sup>55</sup> to integrate transcriptomic data. In brief, RMetD2 calculates the expected fluxes  
530 of reactions based on their reference fluxes and fold changes of gene expression, and searches  
531 for a flux distribution that is close to the expected fluxes while subject to the model  
532 constraints.

533

## 534 *Validation of the results*

535 We validated our findings by performing similar steps of RNA sequencing and functional  
536 analysis for the publicly available mouse MI datasets GSE104187 and GSE52313<sup>14,15</sup>.

537

## 538 *Data and code availability*

539 All raw RNA-sequencing data generated from this study can be accessed through accession  
540 number GSE153485. Codes used during the analysis are available on  
541 [https://github.com/sysmedicine/ArifEtAlI\\_2020\\_MultiTissueMI](https://github.com/sysmedicine/ArifEtAlI_2020_MultiTissueMI)

## 542 References

- 543 1 WHO. *Cardiovascular diseases (CVDs) Fact sheets*, <[https://www.who.int/news-](https://www.who.int/news-room/fact-sheets/detail/cardiovascular-diseases-(cvds))  
544 [room/fact-sheets/detail/cardiovascular-diseases-\(cvds\)](https://www.who.int/news-room/fact-sheets/detail/cardiovascular-diseases-(cvds))> (2019).
- 545 2 Mardinoglu, A., Boren, J., Smith, U., Uhlen, M. & Nielsen, J. The employment of  
546 systems biology in gastroenterology and hepatology. *Nat. Rev. Gastroenterol. Hepatol*  
547 (2017).
- 548 3 Mardinoglu, A. & Nielsen, J. New paradigms for metabolic modeling of human cells.  
549 *Current Opinion in Biotechnology* **34**, 91-97 (2015).
- 550 4 Nielsen, J. Systems biology of metabolism: a driver for developing personalized and  
551 precision medicine. *Cell metabolism* **25**, 572-579 (2017).
- 552 5 Turanli, B. *et al.* Discovery of therapeutic agents for prostate cancer using genome-  
553 scale metabolic modeling and drug repositioning. *EBioMedicine* **42**, 386-396 (2019).
- 554 6 Benfeitas, R. *et al.* Characterization of heterogeneous redox responses in  
555 hepatocellular carcinoma patients using network analysis. *EBioMedicine* **40**, 471-487  
556 (2019).
- 557 7 Bidkhorji, G. *et al.* Metabolic network-based stratification of hepatocellular carcinoma  
558 reveals three distinct tumor subtypes. *Proceedings of the National Academy of*  
559 *Sciences* **115**, E11874-E11883 (2018).
- 560 8 Lee, S. *et al.* Integrated network analysis reveals an association between plasma  
561 mannose levels and insulin resistance. *Cell metabolism* **24**, 172-184 (2016).
- 562 9 Lee, S. *et al.* Network analyses identify liver-specific targets for treating liver  
563 diseases. *Molecular systems biology* **13** (2017).
- 564 10 Bakhtiarizadeh, M. R., Hosseinpour, B., Shahhoseini, M., Korte, A. & Gifani, P.  
565 Weighted Gene Co-expression Network Analysis of Endometriosis and Identification  
566 of Functional Modules Associated With Its Main Hallmarks. *Frontiers in Genetics* **9**,  
567 doi:10.3389/fgene.2018.00453 (2018).
- 568 11 Mukund, K. & Subramaniam, S. Co-expression network approach reveals functional  
569 similarities among diseases affecting human skeletal muscle. *Frontiers in physiology*  
570 **8**, 980 (2017).
- 571 12 Pedrotty, D. M., Morley, M. P. & Cappola, T. P. Transcriptomic biomarkers of  
572 cardiovascular disease. *Progress in cardiovascular diseases* **55**, 64-69 (2012).
- 573 13 Das, S. *et al.* Transcriptomics of cardiac biopsies reveals differences in patients with  
574 or without diagnostic parameters for heart failure with preserved ejection fraction.  
575 *Scientific reports* **9**, 3179 (2019).
- 576 14 Ounzain, S. *et al.* Genome-wide profiling of the cardiac transcriptome after  
577 myocardial infarction identifies novel heart-specific long non-coding RNAs.  
578 *European heart journal* **36**, 353-368 (2014).
- 579 15 Williams, A. L. *et al.* HIF1 mediates a switch in pyruvate kinase isoforms after  
580 myocardial infarction. *Physiological genomics* **50**, 479-494 (2018).
- 581 16 Priest, C. & Tontonoz, P. Inter-organ cross-talk in metabolic syndrome. *Nature*  
582 *Metabolism*, doi:10.1038/s42255-019-0145-5 (2019).

- 583 17 Lex, A., Gehlenborg, N., Strobel, H., Vuillemot, R. & Pfister, H. UpSet: visualization  
584 of intersecting sets. *IEEE transactions on visualization and computer graphics* **20**,  
585 1983-1992 (2014).
- 586 18 Mardinoglu, A. *et al.* The gut microbiota modulates host amino acid and glutathione  
587 metabolism in mice. *Molecular Systems Biology* **11**, 834, doi:10.15252/msb.20156487  
588 (2015).
- 589 19 Lima, I., Peres, W., Cruz, S. & Ramalho, A. Association of Ischemic Cardiovascular  
590 Disease with Inadequacy of Liver Store of Retinol in Elderly Individuals. *Oxidative*  
591 *medicine and cellular longevity* **2018** (2018).
- 592 20 Palace, V. P., Hill, M. F., Khaper, N. & Singal, P. K. Metabolism of vitamin A in the  
593 heart increases after a myocardial infarction. *Free Radical Biology and Medicine* **26**,  
594 1501-1507 (1999).
- 595 21 Traag, V. A., Waltman, L. & van Eck, N. J. From Louvain to Leiden: guaranteeing  
596 well-connected communities. *Scientific reports* **9** (2019).
- 597 22 Chen, E. Y. *et al.* Enrichr: interactive and collaborative HTML5 gene list enrichment  
598 analysis tool. *BMC Bioinformatics* **14**, 128, doi:10.1186/1471-2105-14-128 (2013).
- 599 23 Kuleshov, M. V. *et al.* Enrichr: a comprehensive gene set enrichment analysis web  
600 server 2016 update. *Nucleic Acids Research* **44**, W90-W97, doi:10.1093/nar/gkw377  
601 (2016).
- 602 24 Supek, F., Bošnjak, M., Škunca, N. & Šmuc, T. REVIGO summarizes and visualizes  
603 long lists of gene ontology terms. *PloS one* **6**, e21800 (2011).
- 604 25 Su, A. I. *et al.* A gene atlas of the mouse and human protein-encoding transcriptomes.  
605 *Proceedings of the National Academy of Sciences of the United States of America* **101**,  
606 6062-6067, doi:10.1073/pnas.0400782101 (2004).
- 607 26 Kiyuna, L. A., e Albuquerque, R. P., Chen, C.-H., Mochly-Rosen, D. & Ferreira, J. C.  
608 B. Targeting mitochondrial dysfunction and oxidative stress in heart failure:  
609 challenges and opportunities. *Free Radical Biology and Medicine* **129**, 155-168  
610 (2018).
- 611 27 Palaniyandi, S. S., Qi, X., Yogalingam, G., Ferreira, J. C. B. & Mochly-Rosen, D.  
612 Regulation of mitochondrial processes: a target for heart failure. *Drug Discovery*  
613 *Today: Disease Mechanisms* **7**, e95-e102 (2010).
- 614 28 Camara, A. K., Zhou, Y., Wen, P.-C., Tajkhorshid, E. & Kwok, W.-M. Mitochondrial  
615 VDAC1: a key gatekeeper as potential therapeutic target. *Frontiers in physiology* **8**,  
616 460 (2017).
- 617 29 Schwertz, H. *et al.* Myocardial ischemia/reperfusion causes VDAC phosphorylation  
618 which is reduced by cardioprotection with a p38 MAP kinase inhibitor.  
619 *PROTEOMICS* **7**, 4579-4588, doi:10.1002/pmic.200700734 (2007).
- 620 30 Yada, T. *et al.* Cardioprotective role of endogenous hydrogen peroxide during  
621 ischemia-reperfusion injury in canine coronary microcirculation in vivo. *American*  
622 *Journal of Physiology-Heart and Circulatory Physiology* **291**, H1138-H1146 (2006).
- 623 31 Sun, W. *et al.* Cardiac-specific deletion of the Pdhal gene sensitizes heart to  
624 toxicological actions of ischemic stress. *Toxicological Sciences* **151**, 193-203 (2016).
- 625 32 Mardinoglu, A. *et al.* Personal model-assisted identification of NAD<sup>+</sup> and glutathione  
626 metabolism as intervention target in NAFLD. *Molecular systems biology* **13** (2017).

- 627 33 Alexander, M. *et al.* Non-alcoholic fatty liver disease and risk of incident acute  
628 myocardial infarction and stroke: findings from matched cohort study of 18 million  
629 European adults. *bmj* **367**, 15367 (2019).
- 630 34 Tran, D. H. & Wang, Z. V. Glucose Metabolism in Cardiac Hypertrophy and Heart  
631 Failure. *Journal of the American Heart Association* **8**, e012673 (2019).
- 632 35 Miyamoto, T., Katayama, Y. & Harano, Y. Blood ketone body as a stress marker in  
633 acute myocardial infarction. *Nihon Kyukyu Igakukai Zasshi* **10**, 621-622 (1999).
- 634 36 Zhou, Y. *et al.* Loss of Filamin C Is Catastrophic for Heart Function. *Circulation* **141**,  
635 869-871 (2020).
- 636 37 Hall, C. L. *et al.* RNA sequencing-based transcriptome profiling of cardiac tissue  
637 implicates novel putative disease mechanisms in FLNC-associated arrhythmogenic  
638 cardiomyopathy. *International journal of cardiology* **302**, 124-130 (2020).
- 639 38 Diviani, D., Dodge-Kafka, K. L., Li, J. & Kapiloff, M. S. A-kinase anchoring proteins:  
640 scaffolding proteins in the heart. *American Journal of Physiology-Heart and*  
641 *Circulatory Physiology* **301**, H1742-H1753 (2011).
- 642 39 Turnham, R. E. & Scott, J. D. Protein kinase A catalytic subunit isoform PRKACA;  
643 History, function and physiology. *Gene* **577**, 101-108 (2016).
- 644 40 Bers, D. M. Calcium cycling and signaling in cardiac myocytes. *Annu. Rev. Physiol.*  
645 **70**, 23-49 (2008).
- 646 41 Zhong, X., Qian, X., Chen, G. & Song, X. The role of galectin-3 in heart failure and  
647 cardiovascular disease. *Clinical and Experimental Pharmacology and Physiology* **46**,  
648 197-203 (2019).
- 649 42 Suthahar, N. *et al.* Galectin-3 activation and inhibition in heart failure and  
650 cardiovascular disease: an update. *Theranostics* **8**, 593 (2018).
- 651 43 Ren, J., Pulakat, L., Whaley-Connell, A. & Sowers, J. R. Mitochondrial biogenesis in  
652 the metabolic syndrome and cardiovascular disease. *Journal of molecular medicine*  
653 **88**, 993-1001 (2010).
- 654 44 Siasos, G. *et al.* Mitochondria and cardiovascular diseases—from pathophysiology to  
655 treatment. *Annals of translational medicine* **6** (2018).
- 656 45 Piantadosi, C. A. & Suliman, H. B. Transcriptional control of mitochondrial  
657 biogenesis and its interface with inflammatory processes. *Biochimica et Biophysica*  
658 *Acta (BBA)-General Subjects* **1820**, 532-541 (2012).
- 659 46 Bray, N. L., Pimentel, H., Melsted, P. & Pachter, L. Near-optimal probabilistic RNA-  
660 seq quantification. *Nature biotechnology* **34**, 525 (2016).
- 661 47 Zerbino, D. R. *et al.* Ensembl 2018. *Nucleic Acids Research* **46**, D754-D761,  
662 doi:10.1093/nar/gkx1098 (2017).
- 663 48 Pedregosa, F. *et al.* Scikit-learn: Machine learning in Python. *Journal of machine*  
664 *learning research* **12**, 2825-2830 (2011).
- 665 49 Uhlén, M. *et al.* The human secretome. *Science Signaling* **12**, eaaz0274,  
666 doi:10.1126/scisignal.aaz0274 (2019).
- 667 50 Våremo, L., Nielsen, J. & Nookaew, I. Enriching the gene set analysis of genome-  
668 wide data by incorporating directionality of gene expression and combining statistical

- 669 hypotheses and methods. *Nucleic Acids Research* **41**, 4378-4391,  
670 doi:10.1093/nar/gkt111 (2013).
- 671 51 Jones, E., Oliphant, T. & Peterson, P. SciPy: Open source scientific tools for Python.  
672 (2001).
- 673 52 Perktold, J., Seabold, S. & Taylor, J. (Oct, 2017).
- 674 53 Csardi, G. & Nepusz, T. The igraph software package for complex network research.  
675 *InterJournal, Complex Systems* **1695**, 1-9, doi:10.5281/zenodo.3630268 (2006).
- 676 54 Kummitha, C. M., Kalhan, S. C., Saidel, G. M. & Lai, N. Relating tissue/organ energy  
677 expenditure to metabolic fluxes in mouse and human: experimental data integrated  
678 with mathematical modeling. *Physiological reports* **2** (2014).
- 679 55 Zhang, C. *et al.* RMetD2: a tool for integration of relative transcriptomics data into  
680 Genome-scale metabolic models. *BioRxiv*, 663096 (2019).
- 681
- 682

683 **Table**

684 Table 1 Properties of the co-expression network

| Tissue  | # of Genes | # of Edges | # of Clusters | Modularity Scores |
|---------|------------|------------|---------------|-------------------|
| Heart   | 8793       | 1570898    | 7             | 0.540179085       |
| Liver   | 7760       | 1103589    | 6             | 0.577273459       |
| Muscle  | 8834       | 1660603    | 7             | 0.521239124       |
| Adipose | 10790      | 2636378    | 8             | 0.495469439       |

685

686 **Supplementary Tables**

687 **Table S1** Differential Expression Analysis Results

688 **Table S2** KEGG Pathways

689 **Table S3** Gene Ontology Biological Processes

690 **Table S4** DEG comparison between Liver and other tissues

691 **Table S5** Reporter Metabolite Analysis

692 **Table S6** Enrichment Analyses of Clusters, Clusters properties

693 **Table S7** Food Intake, Energy Expenditure, and Flux Balance Analysis (FBA) of Whole-  
694 Body Modeling

695 **Table S8** Validation Result (Differential Expression and Functional Analysis)

696 **Table S9** Detailed Information of 16 Key Genes that are DEGs in at least 3 tissues and  
697 Neighbors and Functional Analysis Results of The Neighbors of 4 key genes

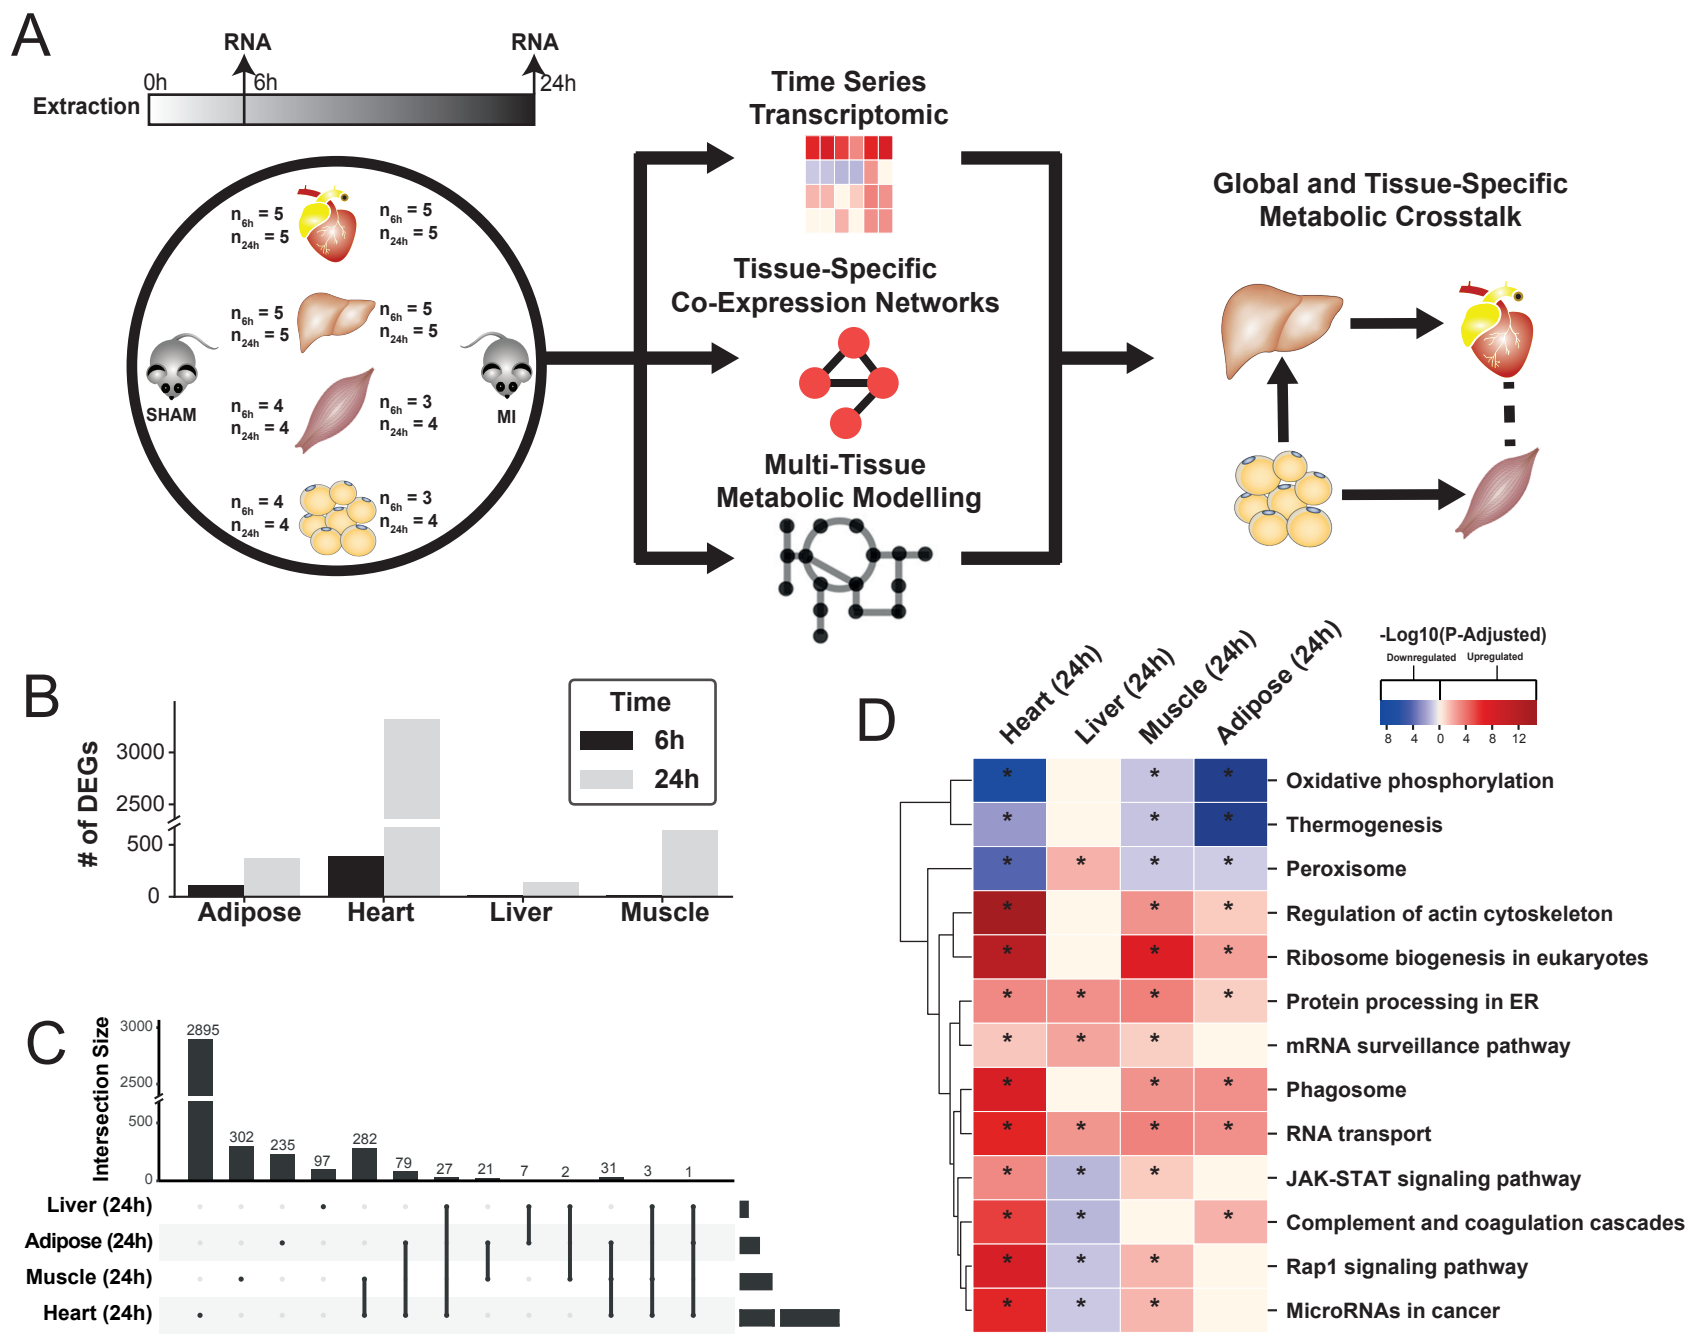

**Figure 1** (A) Overview of this study (B) Number of differentially expressed genes for each tissue at each time point. Effect of MI shown to be more pronounced after 24 h. (C) UpSet plot to show intersection between differentially expressed genes (FDR < 5%) in different tissues. The plot showed that each tissue has its specific set of genes that were affected by MI. (D) KEGG pathway analysis (FDR < 0.05 in at least 3 tissues) for 24 hours post MI compared to its control for each tissue. We observed that 141 (5 upregulated) and 125 (14 upregulated) pathways are significantly altered in heart 6 and 24 h after infarction, respectively. For other tissues, we found that 24 (9 upregulated), 61 (54 upregulated) and 48 (15 upregulated) pathways are altered in liver, muscle, and adipose, respectively.



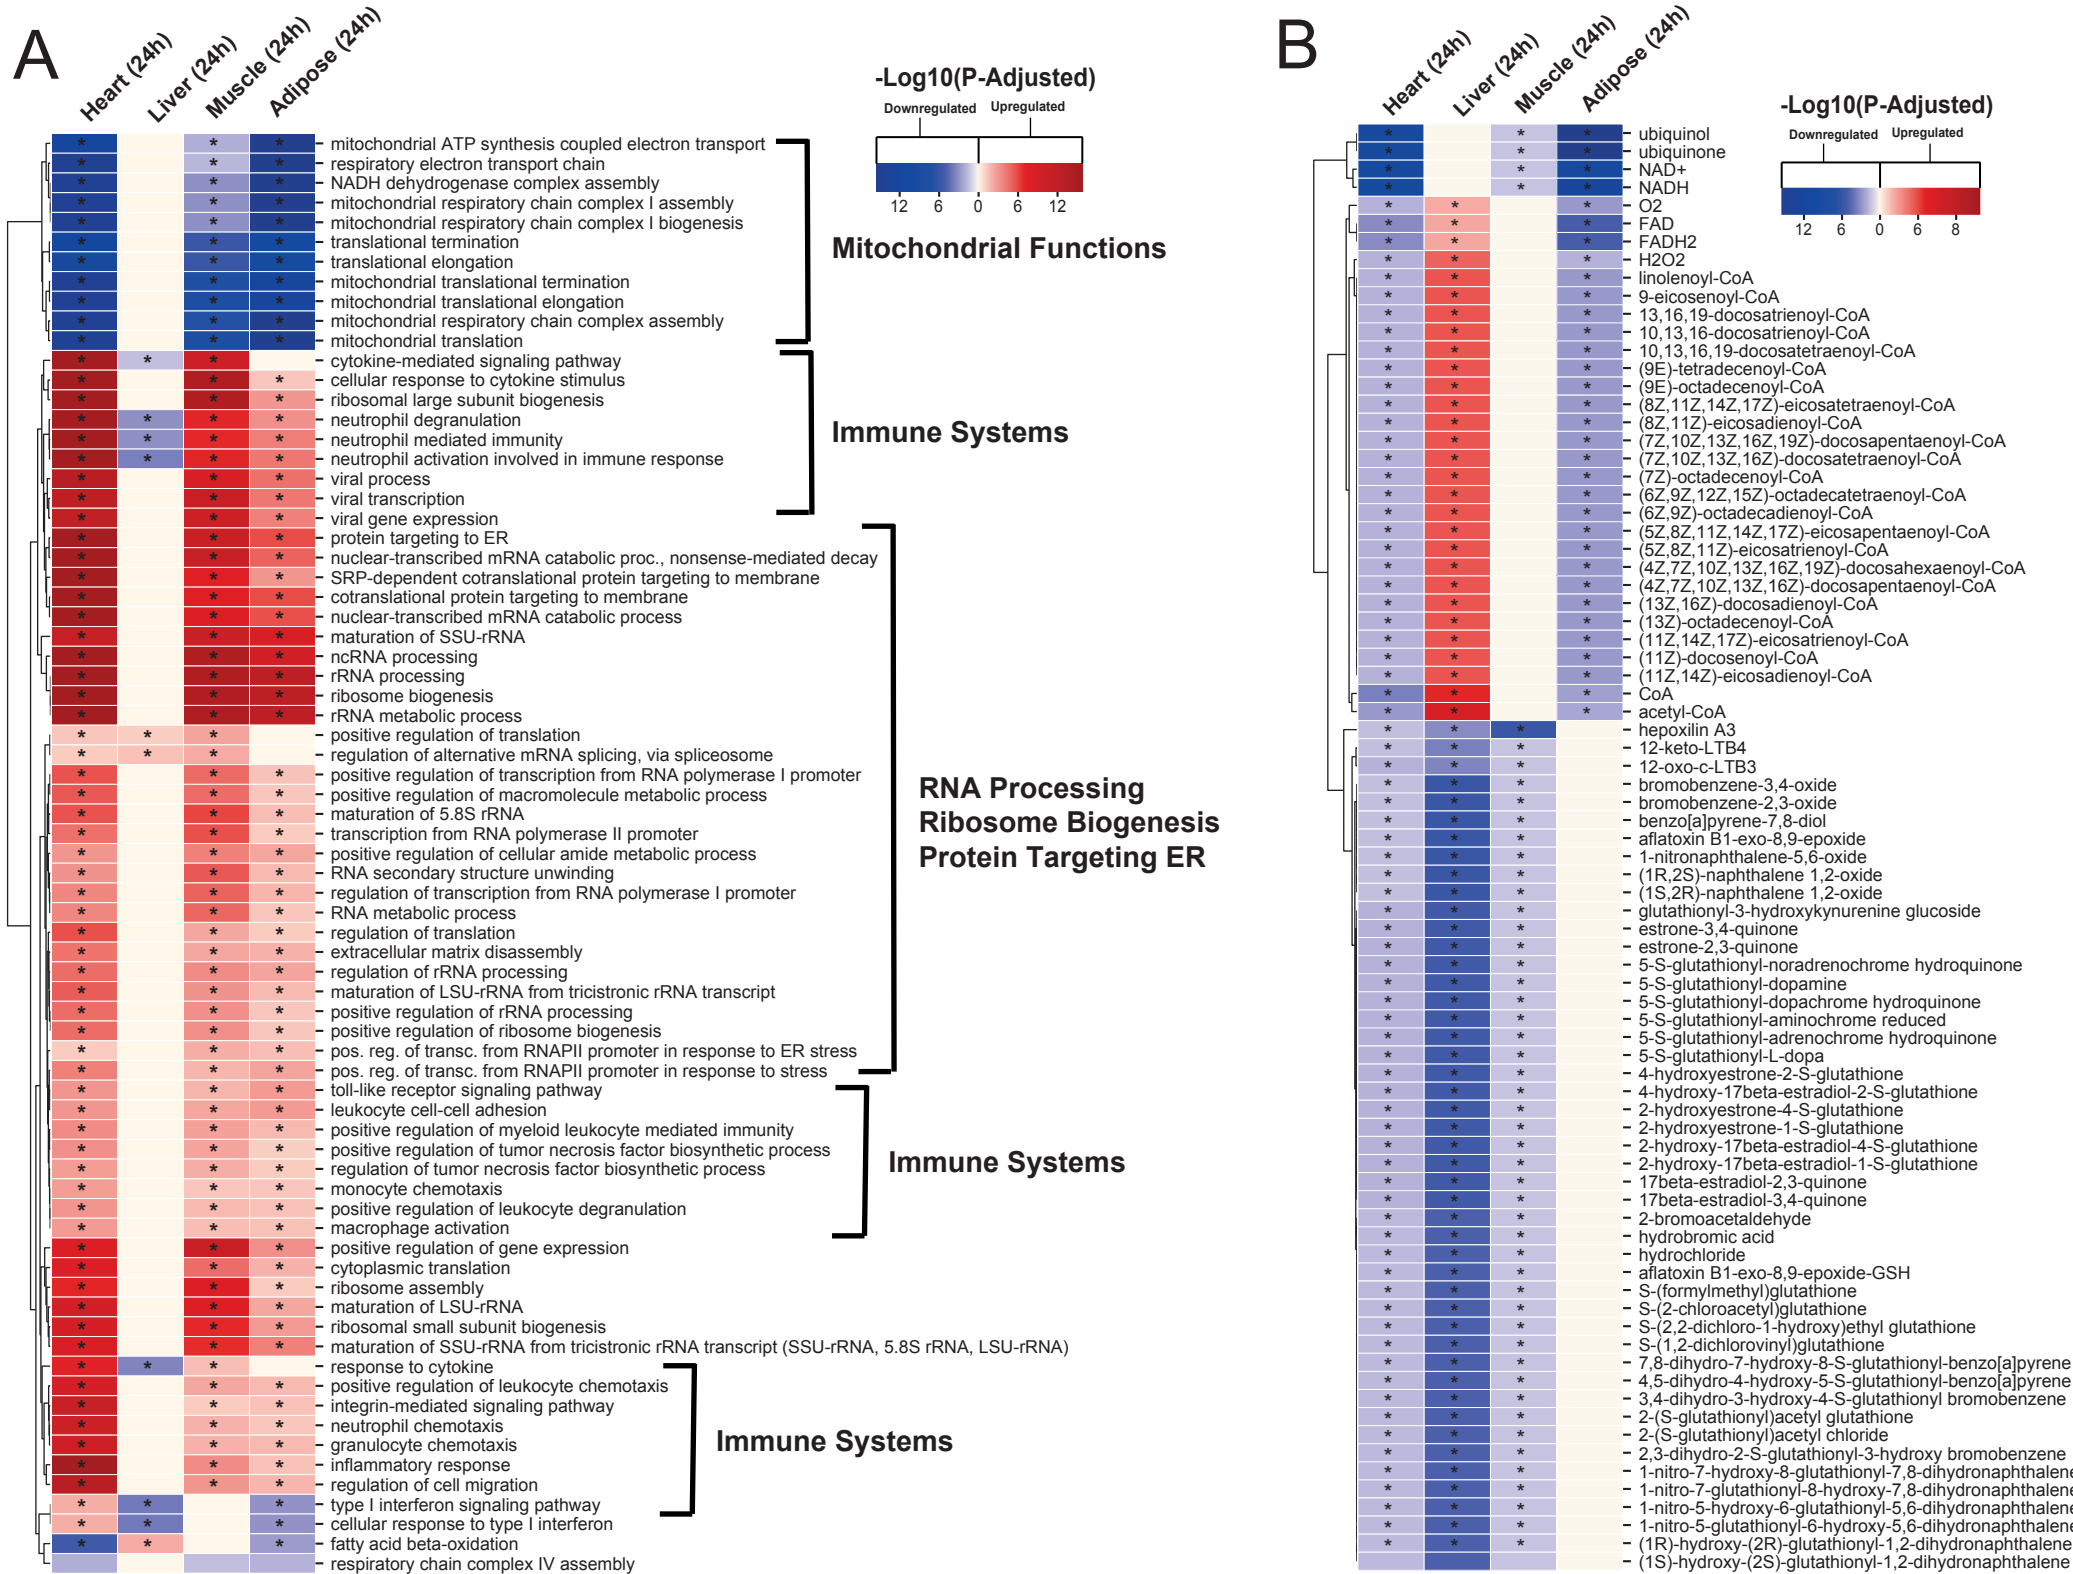

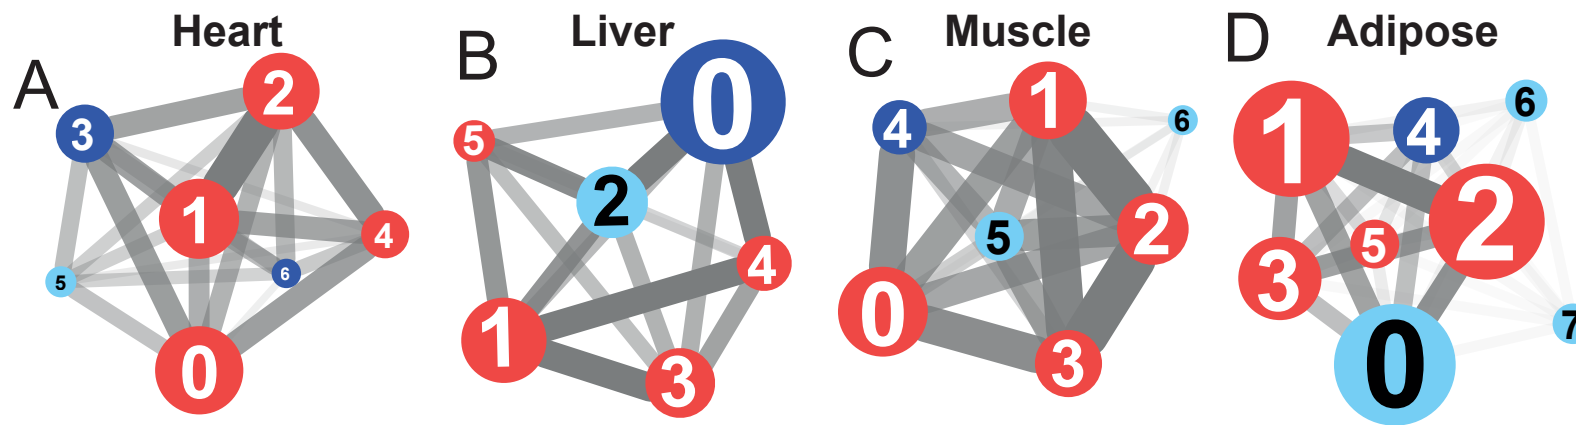

**E** Reg. of transcription from RNAP-II mRNA Processing      Regulation of Mitotic Cell Cycle Phase Ubiquitin-dependent Protein Catabolic Process

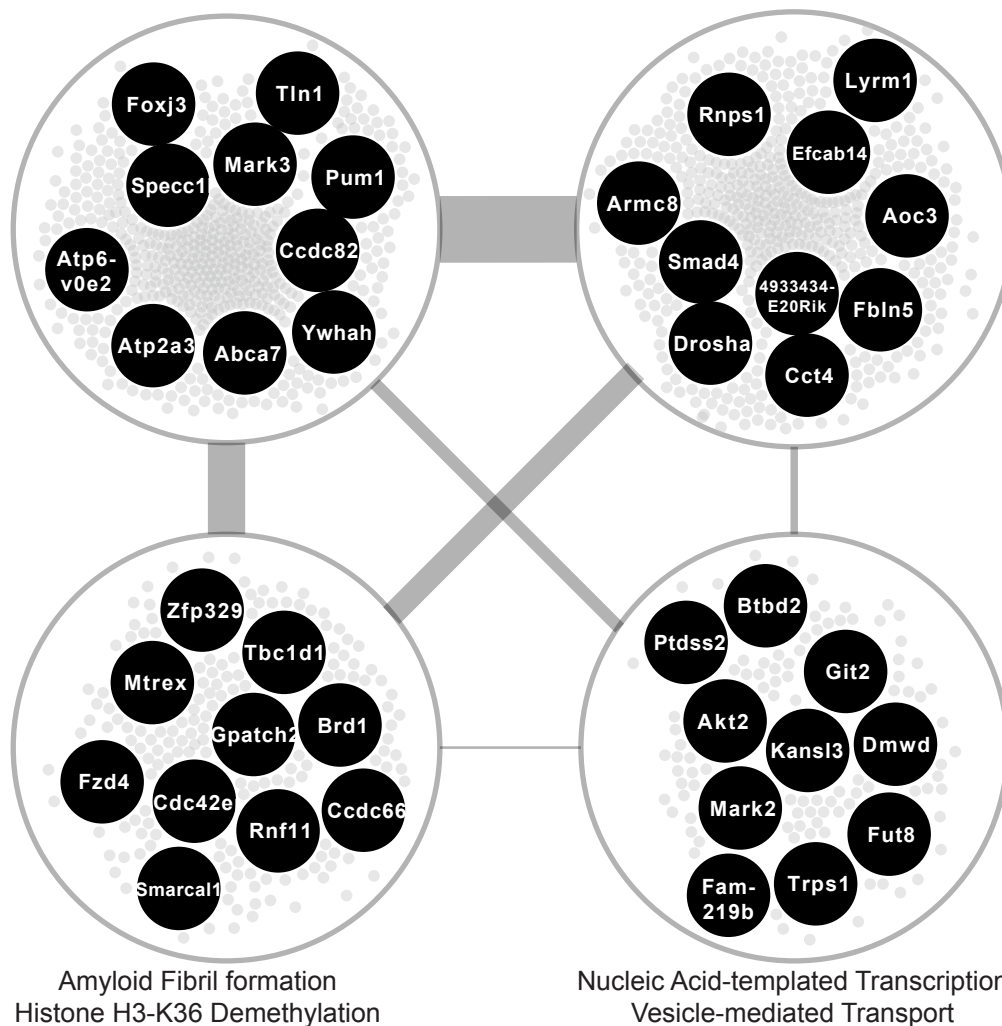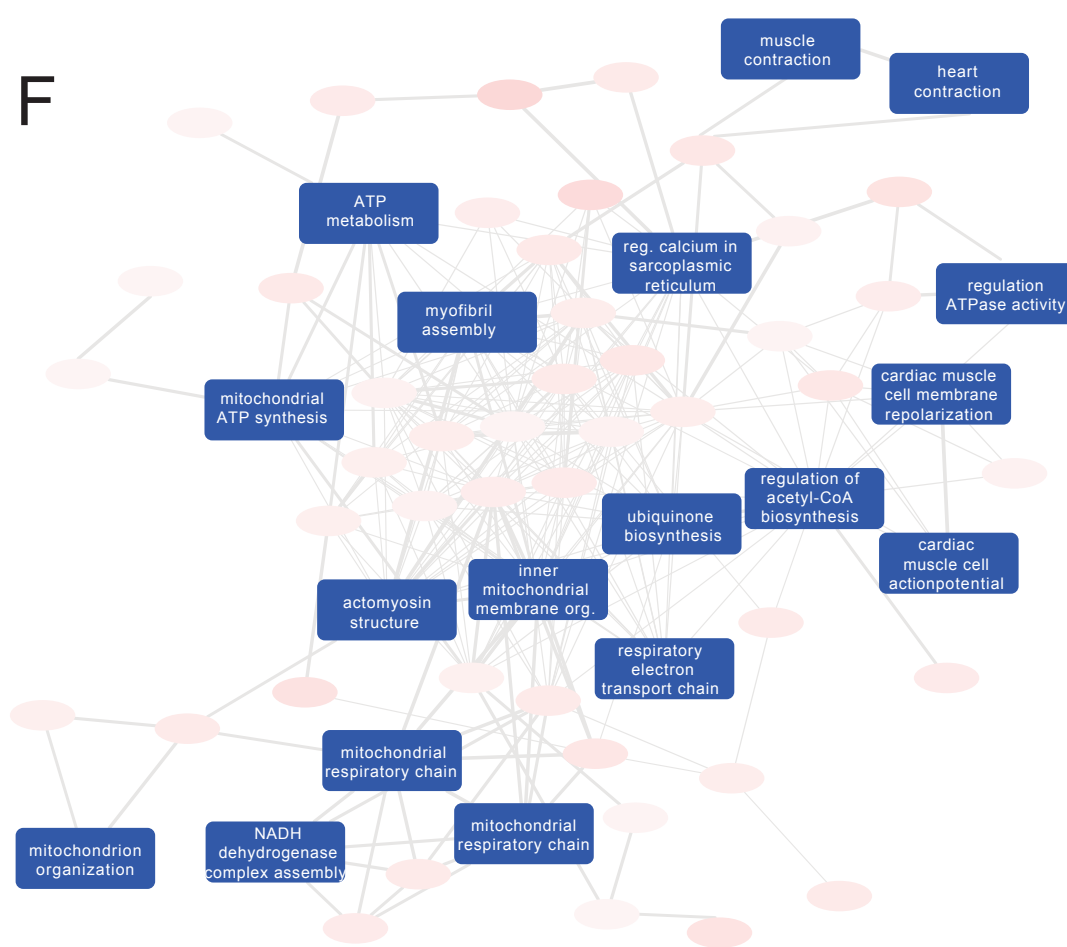

**Figure 3** Network analyses. (A) Heart co-expression network clusters with superimposed DEGs 24 h post-infarction (Blue = down-regulated, Red = up-regulated) marked with the cluster numbers. The edges between the clusters were aggregation of the inter-cluster edges (B) Liver. (C) Muscle. (D) Adipose. (E) Intersection of the most central clusters in all tissues shows that the central architecture of the network was conserved in all tissues. We found 4 sub-clusters within the network intersection. Top 10 most connected genes are marked in black. (F) Enriched GO BP in heart-specific cluster generated by Revigo.

**A**

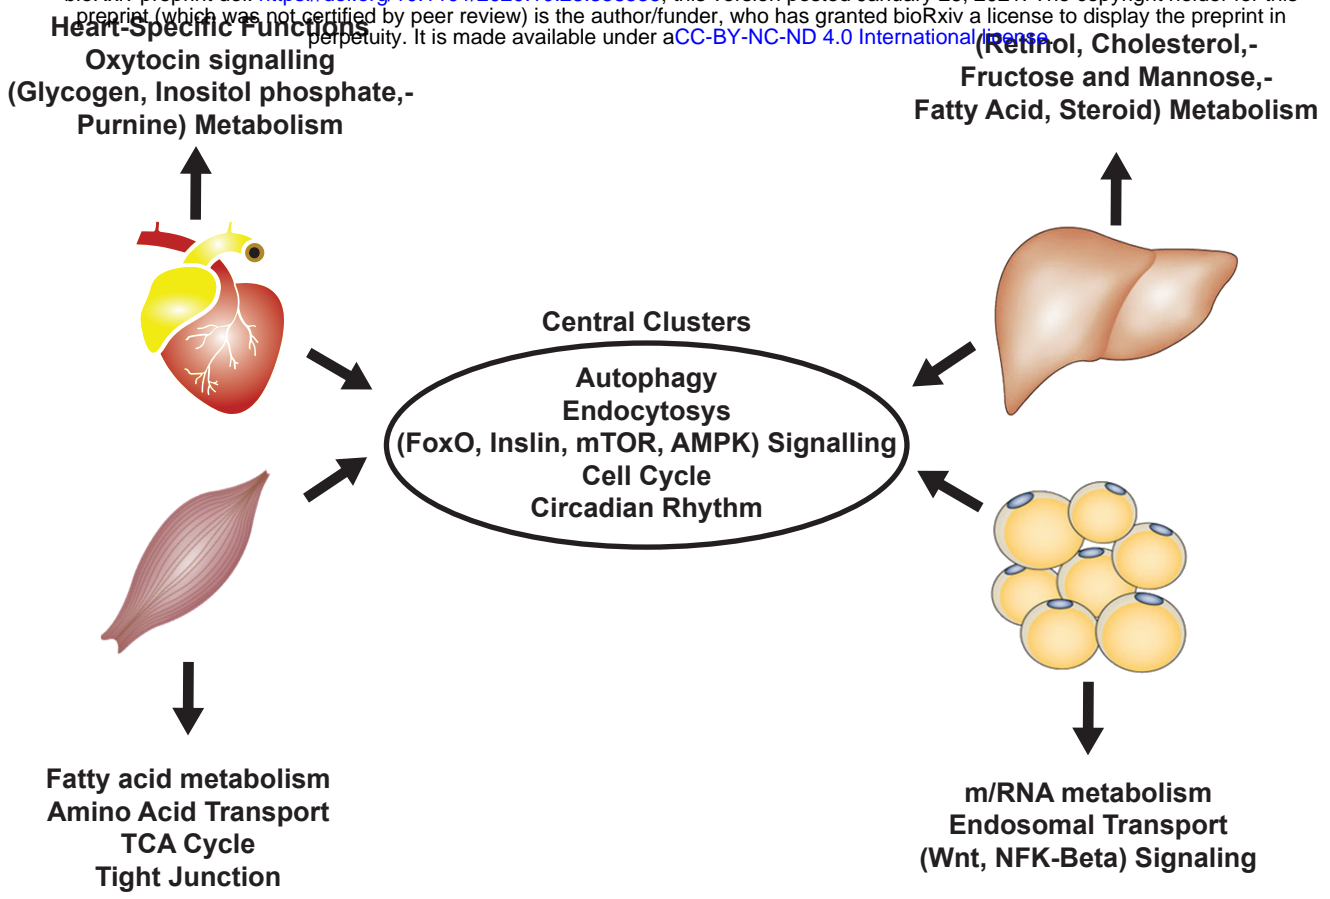

**B**

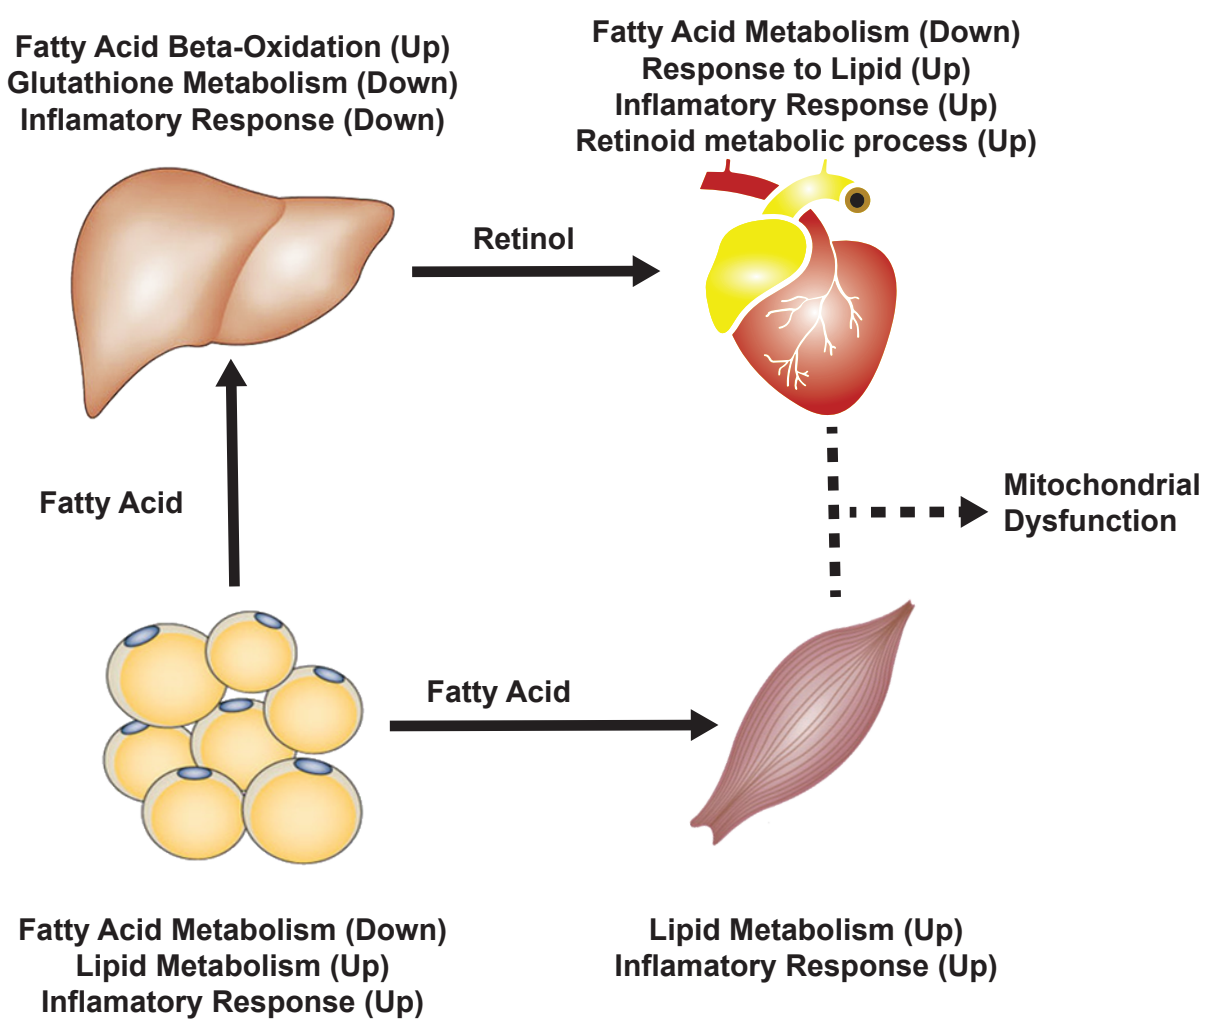

**Figure 4** (A) Similarity of functions in the most central cluster and specific functions of each tissue-specific cluster. (B) Functional analysis for each tissue and hypothesized flow of metabolites

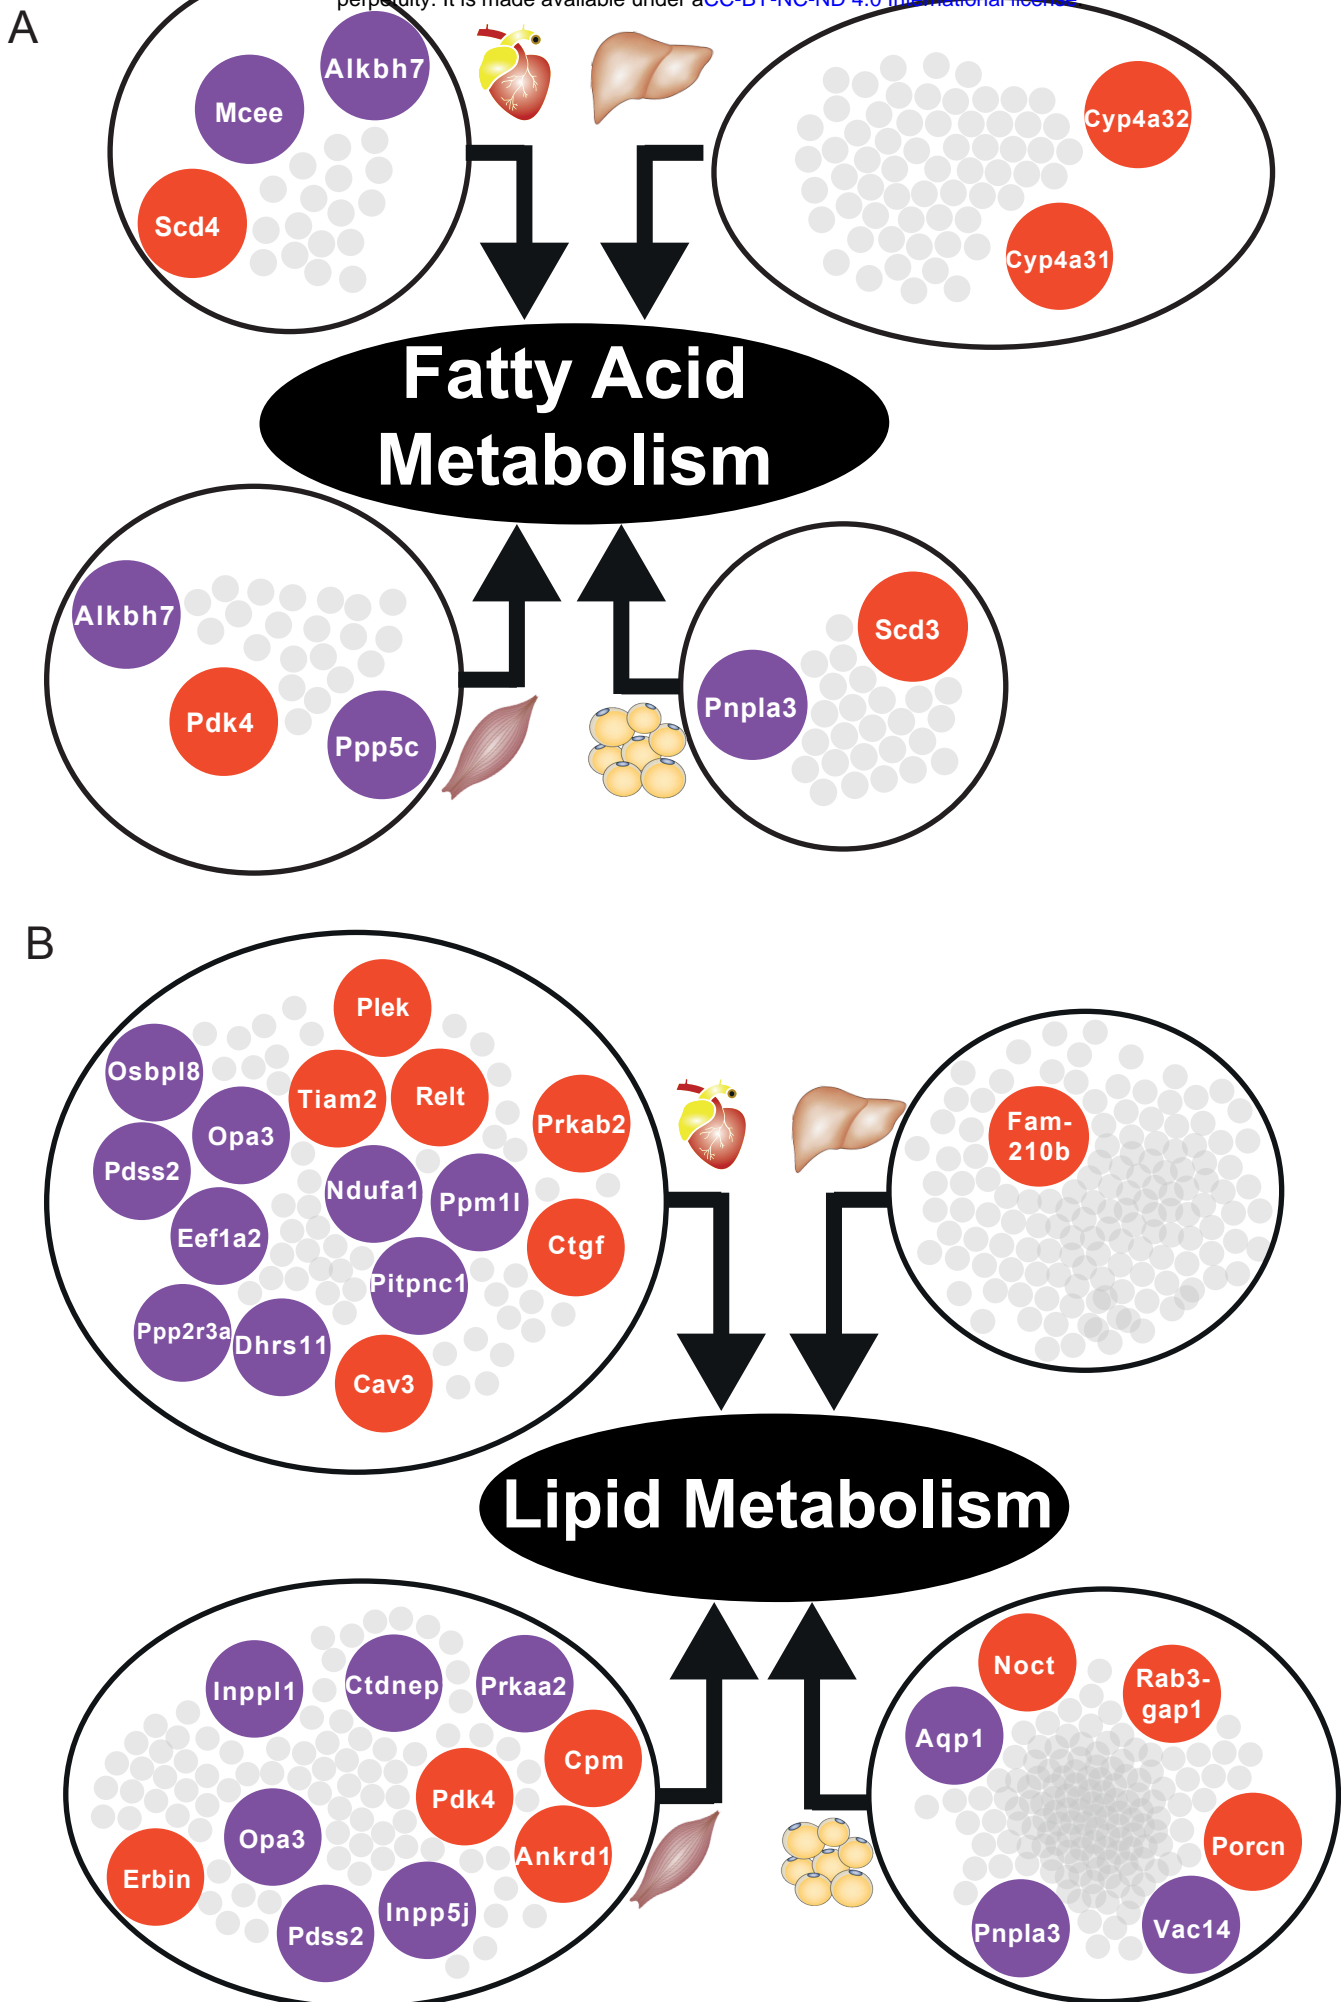

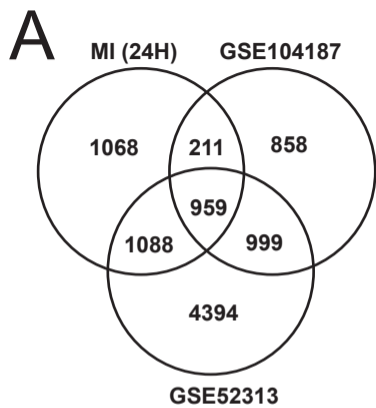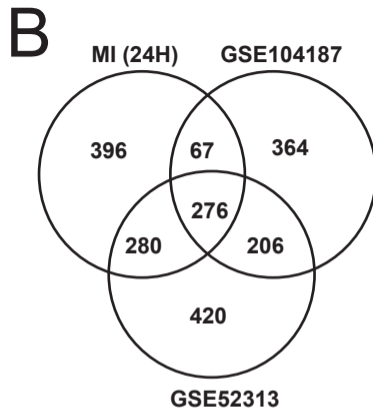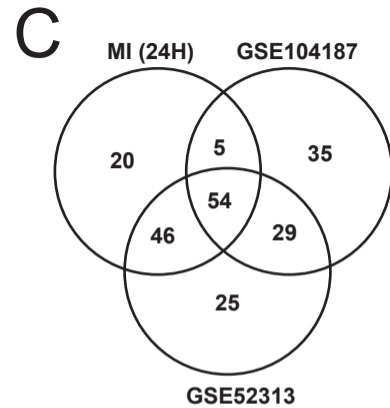

**Figure 6** (A) DEGs intersection of our data and validation cohort (B) & (C) Intersection of functional analysis results (GO BP and KEGG Pathways) of our data and validation cohort
