1 **Revealing tissue-specific metabolic crosstalk after a myocardial infarction**

2  
3 Muhammad Arif<sup>1, #</sup>, Martina Klevstig<sup>2, #</sup>, Rui Benfeitas<sup>3</sup>, Stephen Doran<sup>4</sup>, Hasan Turkez<sup>5</sup>,  
4 Mathias Uhlén<sup>1</sup>, Maryam Clausen<sup>6</sup>, Johannes Wikström<sup>7</sup>, Damla Etal<sup>6</sup>, Cheng Zhang<sup>1</sup>, Malin  
5 Levin<sup>2</sup>, Adil Mardinoglu<sup>1, 4, \*</sup>, Jan Boren<sup>2, \*</sup>

6 <sup>1</sup>Science for Life Laboratory, KTH - Royal Institute of Technology, Stockholm, SE-17121,  
7 Sweden.

8  
9 <sup>2</sup>Department of Molecular and Clinical Medicine, University of Gothenburg, The Wallenberg  
10 Laboratory, Sahlgrenska University Hospital, Gothenburg, Sweden.

11  
12 <sup>3</sup>National Bioinformatics Infrastructure Sweden (NBIS), Science for Life Laboratory,  
13 Department of Biochemistry and Biophysics, Stockholm University, S-10691 Stockholm,  
14 Sweden

15  
16 <sup>4</sup>Centre for Host-Microbiome Interactions, Faculty of Dentistry, Oral & Craniofacial  
17 Sciences, King's College London, London, SE1 9RT, United Kingdom.

18  
19 <sup>5</sup>Department of Medical Biology, Faculty of Medicine, Atatürk University, Erzurum, 25240,  
20 Turkey.

21  
22 <sup>6</sup>Translational Genomics, BioPharmaceuticals R&D, Discovery Sciences, AstraZeneca,  
23 Gothenburg, Sweden.

24  
25 <sup>7</sup>Bioscience Cardiovascular, Research and Early Development, Cardiovascular, Renal and  
26 Metabolism (CVRM), BioPharmaceuticals R&D, AstraZeneca, Gothenburg, Sweden

27  
28 <sup>#</sup>Contributed equally.

29 <sup>\*</sup>Corresponding authors: Adil Mardinoglu and Jan Boren

30 Email: [adilm@scilifelab.se](mailto:adilm@scilifelab.se); [Jan.Boren@wlab.gu.se](mailto:Jan.Boren@wlab.gu.se)

31

32

33 **Abstract/Summary**

34 Myocardial infarction (MI) promotes a range of systemic effects, many of which are  
35 unknown. Here, we investigated the alterations associated with MI progression in heart and  
36 other metabolically active tissues (liver, skeletal muscle, and adipose) in a mouse model of  
37 MI (induced by ligating the left ascending coronary artery) and sham-operated mice. We  
38 performed a genome-wide transcriptomic analysis on tissue samples obtained 6- and 24-hours  
39 post MI or sham operation. By generating tissue-specific biological networks, we observed:  
40 (1) dysregulation in multiple biological processes (including immune system, mitochondrial  
41 dysfunction, fatty-acid beta-oxidation, and RNA and protein processing) across multiple  
42 tissues post MI; and (2) tissue-specific dysregulation in biological processes in liver and heart  
43 post MI. Finally, we validated our findings in independent MI cohorts, using both bulk and  
44 single-cell transcriptomic data. Overall, our integrative analysis highlighted both common and  
45 specific biological responses to MI across a range of metabolically active tissues.

46

47 **Keywords**

48 Systems biology; network analysis; whole-body modelling; cardiovascular disease;  
49 Myocardial infarction; multi-tissue; metabolically active tissues; liver; adipose; muscle

50

## 51 **Introduction**

52 Cardiovascular disease (CVD) is the leading cause of death worldwide, accounting for more  
53 than 17 million deaths globally in 2016 (WHO, 2019). Myocardial infarction (MI) is one of  
54 the most common causes of CVD-related death, and is the result of severe coronary artery  
55 disease that develops from tapered arteries or chronic blockage of the arteries caused by  
56 accumulation of cholesterol or plaque (atherosclerosis). MI has been linked to multiple  
57 behavioral risk factors (including unhealthy diet, physical inactivity, excessive use of alcohol,  
58 and tobacco consumption) that can lead to significant alterations in metabolism that are  
59 responsible for hypertension, obesity, diabetes, and hyperlipidemia. These abnormalities are  
60 known as the high-risk factors of MI and CVDs in general.

61  
62 Systems biology has been used in many studies to reveal the underlying molecular  
63 mechanisms of complex human diseases and to answer important biological questions related  
64 to the progression, diagnosis and treatment of the diseases. The use of systems biology has  
65 aided the discovery of new therapeutic approaches in multiple diseases (Mardinoglu et al.,  
66 2017b; Mardinoglu and Nielsen, 2015; Nielsen, 2017) by identifying novel therapeutic agents  
67 and repositioning of existing drugs (Turanli et al., 2019). Systems biology has also been  
68 employed in the identification of novel biomarkers, characterization of patients and  
69 stratification of heterogenous cancer patients (Benfeitas et al., 2019; Bidkhorji et al., 2018;  
70 Lee et al., 2016). Specifically, integrated networks (INs) (Lee et al., 2016) and co-expression  
71 networks (CNs) (Lee et al., 2017) have been proven to be robust methods for revealing the  
72 key driver of metabolic abnormalities, discovering new therapy strategies, as well as gaining  
73 systematic understanding of diseases (Bakhtiarizadeh et al., 2018; Mukund and Subramaniam,  
74 2017).

75  
76 Previously, multiple studies in individual tissues have been performed and provided new  
77 insights into the underlying mechanisms of diseases (Das et al., 2019; Ounzain et al., 2014;  
78 Pedrotty et al., 2012; Williams et al., 2018). However, the crosstalk between different tissues  
79 and their dysregulation has not been examined in MI and other CVD-related complications  
80 (Priest and Tontonoz, 2019). Here we performed an integrated analysis of heart and other  
81 metabolically active tissues (liver, skeletal muscle and adipose tissue) using a mouse model of  
82 MI. We used several systems biology approaches to obtain a systematic picture of the

83 metabolic alterations that occur after an MI (**Figure 1A**), and validated our findings in human  
84 and mouse datasets.

## 85 **Results**

### 86 *Differential expression analysis shows a pronounced effect on gene expression 24 h post* 87 *MI*

88 To study global biological alterations and systemic whole-body effects associated with MI,  
89 we obtained heart, liver, skeletal muscle, and white adipose tissue from mice 6 h and 24 h  
90 after either an MI (induced by ligating the left ascending coronary artery) or a sham operation  
91 (as control). We generated transcriptomics data and identified differentially expressed genes  
92 (DEGs) 6 and 24 h post MI and sham operation in all tissues, with the most significant  
93 differences occurring after 24 h (**Table S1, Figure 1B**). Principal component analysis (PCA)  
94 showed a close clustering between the control (for both time points) and MI (6 h and 24 h  
95 separately) samples for heart tissue but clustering by extraction time points (6 h and 24 h  
96 clusters) for the other tissues (**Figure S1**). We present the transcriptional changes associated  
97 with MI in **Table S1** and the DEGs (FDR < 5%) using an UpSet plot (Lex et al., 2014) in  
98 **Figure 1C**.

99

100 All tissues showed a more pronounced effect in terms of the number of DEGs 24 h post MI  
101 (**Figure 1C**). As expected, the most affected tissue was the heart (393 DEGs at 6 h, 3318  
102 DEGs at 24 h, and 318 DEGs were the same at both time points). By contrast, 136, 641 and  
103 374 genes were significantly changed in liver, skeletal muscle and adipose tissues 24 h post  
104 MI compared to control, respectively. More than 33% of the DEGs that significantly changed  
105 in the other tissues also changed in the heart (**Figure 1C**). Interestingly, more than 97% of the  
106 shared DEGs between heart and skeletal muscle changed in the same direction, with  
107 corresponding numbers of 88% and 64% in adipose and liver, respectively.

108

### 109 *Functional analysis reveals widespread mitochondrial, fatty acid, immune, and protein and* 110 *RNA-related alterations post MI with liver shows contrasting trend*

111 We performed gene-set enrichment analysis (GSEA) with KEGG pathways (**Table S2,**  
112 **Figure 1D**) and gene ontology (GO) biological processes (BPs) (**Table S3, Figure 2A**) to  
113 identify altered biological functions and pathways 24 h after an MI. Mitochondrial functions  
114 (specifically, mitochondrial translation, respiratory chain and oxidative phosphorylation) were  
115 significantly downregulated in the heart, muscle and adipose tissues but not in the liver.  
116 Processes related to oxidative stress were upregulated in the heart and skeletal muscle. Fatty  
117 acid beta-oxidation was downregulated in the heart and adipose but upregulated in the liver.

118 Processes and pathways related to immune systems were significantly upregulated in the heart  
119 and skeletal muscle but significantly downregulated in liver. Processes associated with protein  
120 and RNA processing, ribosome biogenesis and protein targeting endoplasmic reticulum were  
121 upregulated in all tissues except liver whereas protein processing in endoplasmic reticulum  
122 and RNA transport pathways were upregulated in all tissues.

123 We also observed that liver was showing opposite trends compared to the other tissues in  
124 other important functions, such as fatty acid metabolism and immune response. By checking  
125 regulation at the gene level, we observed that only 16 DEGs in liver showed opposite  
126 regulation compared to the other tissues whereas 97 out of the 136 DEGs in liver were not  
127 DEGs in any other tissues (**Table S4**). Therefore, the differences we observed in liver were  
128 mainly due to different DEGs rather than opposite regulation compared to other tissues.

129

### 130 *Tissue-specific altered biological functions point to specificity of metabolic and signaling* 131 *responses to MI*

132 The functional analysis also indicated that several metabolic pathways (including cholesterol,  
133 ascorbate and aldarate, linoleic acid, and sphingolipid metabolism pathways) and signaling  
134 pathways (including GnRH, FoxO, cAMP and prolactin signaling pathways) were  
135 significantly upregulated in heart 6 h after an MI (**Table S2, Figure S2A**). We also observed  
136 significant down regulation of tryptophan metabolism and upregulation of glycosaminoglycan  
137 biosynthesis in heart 24 h after an MI (**Table S2, Figure S2A**). Processes related to retinol  
138 metabolism were upregulated in heart at both timepoints. Pathways that were previously  
139 associated with cardiac hypertrophy and cardiac remodeling (e.g. JAK-STAT, MAPK,  
140 estrogen, and TNF signaling pathways, and ECM-receptor interaction) were significantly  
141 upregulated in heart 6 and 24 h after an MI (**Figure S1B**).

142

143 Our analysis also indicated significant metabolic differences in adipose tissue 24 h after an MI  
144 (**Figure S2B**). Fructose and mannose metabolism, glyoxylate and dicarboxylate metabolism,  
145 glycolysis/gluconeogenesis, and pentose phosphate pathways, glycine, serine and threonine  
146 metabolism and pyrimidine metabolism, as well as endocrine systems (e.g. insulin signaling  
147 pathway and regulation of lipolysis in adipocytes) were downregulated in adipose tissue.  
148 We observed that the PPAR signaling pathway was upregulated whereas glutathione was  
149 downregulated in liver 24 h post-infarction (**Figure S2B**). We found that sphingolipid

150 metabolism and immune-related pathways were upregulated in skeletal muscle 24 h post-  
151 infarction (**Figure S2B**).

152

153 ***Reporter metabolite analyses show significant alterations in fatty acid, amino acid, retinol,***  
154 ***and estrogen metabolism post MI***

155 To predict the effect of the transcriptional changes on metabolism, we performed reporter  
156 metabolite analyses (**Table S5**) using the gene-to-metabolites mapping from the Mouse  
157 Metabolic Reaction database (Mardinoglu et al., 2015); results in each tissue 24 h after MI are  
158 shown in **Figure 2B**. In agreement with our analyses above, reporter metabolites related to  
159 oxidative phosphorylation, such as *ubiquinol*, *ubiquinone*, *NADH* and *NAD+*, were  
160 downregulated in all tissues except liver. Moreover, *linolenoyl-CoA*, *acetyl CoA*, and several  
161 other fatty acyl-CoA-related metabolites were downregulated in heart and adipose tissue but  
162 upregulated in liver. We also found that several *5-S-glutathionyl* metabolite forms, known to  
163 be related to phenylalanine, tyrosine and tryptophan biosynthesis, were downregulated in  
164 heart, liver and skeletal muscle. The same pattern of downregulation was also observed for  
165 metabolites related to estrogen metabolism, specifically metabolites related to oestrone and its  
166 glutathione conjugate derivative. Moreover, *12-keto-LTB4* and *12-oxo-c-LTB3*, related to  
167 leukotriene metabolism, and *hepoxilin A3*, an arachidonic acid, were also found to be  
168 downregulated in heart, liver, and skeletal muscle.

169

170 The liver showed the highest alteration in reporter metabolites, which is attributed to its role  
171 as one of the most metabolically active tissues. We found that several reporter metabolites  
172 related to retinol metabolism, namely *retinal*, *retinol*, *retinoate*, and *all-trans-18-*  
173 *hydroxyretinoic acid*, were significantly downregulated only in liver tissue. Retinol  
174 metabolism has been previously associated with MI (Lima et al., 2018; Palace et al., 1999).

175

176 ***Network analyses unveil universal and tissue-specific clusters and mechanisms post MI***

177 The use of co-expression network (CN) analyses can assist in elucidating the functional  
178 relationships between genes in a specific cell and tissue (Lee et al., 2017). Here, we  
179 performed CN analysis to reveal the functional relationship between the DEGs by generating  
180 tissue-specific CNs and selected highly connected genes (the top 5% positively correlated  
181 genes that fulfilled  $FDR < 0.05$ ) (**Table 1**). To better define the structure of the networks, we  
182 used the Leiden clustering algorithm (Traag et al., 2019) by maximizing the modularity scores

183 (**Figure 3A-D**) and selected the clusters that include more than 30 genes. Next, we  
184 superimposed DEGs 24 h post-infarction onto the network (**Table S1**) and identified the  
185 components of the clusters that were affected by an MI. We also used functional analysis with  
186 GO BP and KEGG pathways to understand the specific functions associated with each cluster  
187 by using the Enrichr algorithm (FDR < 0.05) (Chen et al., 2013; Kuleshov et al., 2016). We  
188 summarized the GO BP terms with Revigo (**Table S6**) (Supek et al., 2011) and checked the  
189 average clustering coefficient to define the centrality of each cluster (**Table S6**) (Lee et al.,  
190 2017). Among the clusters, we identified the key clusters as those with the highest average  
191 clustering coefficient, allowing us to identify sets of genes whose time-dependent coordinated  
192 changes showed the strongest relationships.

193

194 Interestingly, key clusters contained genes with similar functionalities including RNA  
195 processing, transports, and RNA metabolic processes in all tissue-specific CNs (**Table S6**). In  
196 addition, we found that the majority of the DEGs associated with those clusters were  
197 significantly upregulated. These observations strengthen the findings of the functional  
198 analysis above (**Figure 2A**) and further highlight how embryonically distinct tissues display  
199 similar functional responses to MI, with the most highly connected groups of genes preserved  
200 between different tissues (**Table S6, Figure 3E**).

201

### 202 *Community detection reveals tissue-specific clusters post MI*

203 We investigated the tissue specificity of each cluster by performing enrichment analysis with  
204 data from the Mouse Gene Atlas (Su et al., 2004), which involved counting the number of  
205 tissue-specific genes.

206

207 The heart network showed the highest number of tissue-specific genes in cluster Heart-3 (302  
208 genes). Based on DEG analysis, we found that 522 genes were downregulated and 192 genes  
209 were upregulated in the cluster. The enriched GO BP terms in the cluster were mitochondrial  
210 transport, protein processing and respiratory chain, cardiac muscle cell action potential,  
211 response to muscle stretch, and heart contraction (**Figure 3F**). We observed that the results of  
212 the KEGG pathway enrichment analysis were consistent with those obtained from GO BP  
213 analysis (**Table S6**).

214



215 In the liver network, cluster Liver-2 showed the highest tissue specificity (479 genes). In this  
216 cluster, we found that 15 genes were significantly downregulated and 17 genes were  
217 significantly upregulated. Based on GO BP enrichment analysis, the genes in this cluster were  
218 associated with cholesterol metabolism and homeostasis, lipid transport, glutathione  
219 metabolism, lipoprotein metabolism, and glucose 6-phosphate metabolism (**Table S6**). KEGG  
220 enrichment analysis also showed that the genes in the cluster were related to retinol,  
221 carbohydrate, lipid and amino-acid metabolism (**Table S6**).

222

223 The muscle network had two clusters with high tissue specificity: cluster Muscle-4 (276  
224 genes) and Muscle-5 (143 genes). Muscle-4 showed association with GO BP terms such as  
225 mitochondrial transport, protein processing and respiratory chain, response to muscle stretch,  
226 and muscle contraction (**Table S6**). In contrast, the KEGG pathway in this cluster showed  
227 relation to glycolysis/gluconeogenesis, propanoate metabolism, glyoxylate and dicarboxylate  
228 metabolism, and several signaling pathways (e.g. oxytocin, glucagon, cGMP-PKG and HIF-1)  
229 (**Table S6**). Muscle-5 was enriched in GO BP terms associated with protein  
230 dephosphorylation, muscle contraction and intracellular protein transport (**Table S6**). We also  
231 found that insulin, MAPK and Wnt signaling pathways were associated to Muscle-5 from the  
232 KEGG enrichment analysis (**Table S6**).

233

234 The adipose tissue network showed tissue specificity in cluster Adipose-2 (33 genes), which  
235 is associated with GO BP processes including mRNA processing, regulation of mitotic cell  
236 cycle phase, ribosome biogenesis, and viral processes (**Table S6**). We observed that the  
237 results of the KEGG pathway enrichment analysis were consistent with those obtained from  
238 GO BP analysis, with additional associations with multiple signaling and regulatory pathways  
239 (**Table S6**).

240

#### 241 ***Tissue-specific clusters show important tissue-specific changes post MI***

242 To understand the specific behavior of each tissue, we further studied the tissue-specific  
243 clusters in the CNs (**Figure 4A**). Heart specific cluster, Heart-3, was driven by several central  
244 genes including *Pln*, *Pde4b*, and *Atp2a2* (related to regulation of cardiac muscle contraction)  
245 and *Pdha1* and *Vdac1* (related to mitochondrial functions). These genes were also found to be  
246 significantly differentially expressed in heart 24 hours post MI (**Table S1**). Genes in the  
247 heart-specific cluster were related to multiple other processes/pathways, e.g. oxytocin

248 signaling pathway, and several metabolic pathways (glycogen, inositol phosphate and purine)  
249 (**Table S6**).

250

251 Mitochondrial dysfunction in the heart leads to disturbance of energy (ATP) production  
252 (Kiyuna et al., 2018; Palaniyandi et al., 2010) and, in the presence of oxygen, to  
253 accumulation of reactive oxygen species (ROS), which can cause oxidative stress. *Vdac1*, a  
254 key gene for regulation of mitochondria function and one of the central genes in the heart-  
255 specific cluster (see above), is significantly downregulated in MI (Camara et al., 2017). *Vdac1*  
256 is located in the outer mitochondrial membrane and is involved directly in cardioprotection  
257 (Schwartz et al., 2007) within the cGMP/PKG pathway (**Figure S3A**). In the same pathway,  
258 we also observed down-regulation of the reporter metabolite hydrogen peroxide (**Table S5**), a  
259 ROS that is related to cardioprotection (Schwartz et al., 2007; Yada et al., 2006). We also  
260 observed downregulation of *Pdha1*, which is known to have a substantial role in both the  
261 HIF-1 signaling pathway and the pyruvate metabolism pathway that converts pyruvate to  
262 acetyl-CoA in the mitochondria (**Figure S3B**). Acetyl-CoA is used in the TCA cycle to  
263 produce NADH and FADH<sub>2</sub>, which are both needed for ATP production and were  
264 downregulated in our reporter metabolite analysis of the heart. Our findings are thus  
265 consistent with dysfunctional mitochondria and ATP production in the heart in response to an  
266 MI. *Pdha1* has been also been linked to the heart sensitivity during to ischemic stress, where  
267 its deficiency can compromise AMP-activated protein kinase activation (Sun et al., 2016).

268

269 In skeletal muscle and adipose tissue, we found that central genes in their respective tissue-  
270 specific clusters related to fatty acid metabolism and lipid metabolism were significantly  
271 altered (**Table S6, Figure 5**). In liver-specific cluster, we found that their central genes were  
272 related to fatty-acid beta oxidation (*Cyp4a31*, *Cyp4a32*) and glutathione metabolism (*Gstm3*)  
273 (**Table S6, Figure 5A**). Alterations of fatty acid beta-oxidation and glutathione metabolism  
274 have previously been reported in non-alcoholic fatty liver disease, a known risk factor of  
275 CVD (Alexander et al., 2019; Mardinoglu et al., 2017a). Moreover, in liver, we also found  
276 that retinol metabolism was uniquely related to genes in the liver-specific cluster, mainly  
277 driven by four significantly differentially expressed central genes of the clusters, i.e.  
278 *Cyp26a1*, *Cyp4a31*, *Cyp4a32*, and *Hsd17b6* (**Table S6**). A previous study showed that  
279 mortality from CVD in older individuals was accompanied by impaired liver ability to store  
280 retinol (Lima et al., 2018).

281

282 ***Multi-tissue modeling reveals key metabolic pathways affected post MI***

283 To investigate the metabolic responses to MI in and across tissues in the mice, we constructed  
284 a multi-tissue genome-scale metabolic model. The model consisted of five tissue-specific  
285 genome scale metabolic models, namely heart, liver, skeletal muscle, adipose, and small  
286 intestine. The small intestine model (for which we do not have transcriptomic data) was added  
287 to include ingestion and conversion of dietary nutrients into chylomicrons, which are directly  
288 secreted into blood and transport lipids to other tissues (Mardinoglu et al., 2015). The final  
289 mouse multi-tissue model included 19,859 reactions, 13,284 metabolites, 7,116 genes and 41  
290 compartments. We predicted the metabolic fluxes in mice 24 h after an MI or sham operation  
291 by integrating the dietary input, tissue-specific resting energy expenditure and transcriptomics  
292 data.

293

294 The modeling showed that oxygen uptake, carbon dioxide production and the oxidative  
295 phosphorylation pathway in heart, adipose and skeletal muscle were decreased in MI mice, in  
296 agreement with the downregulation of oxidative phosphorylation we observed in these tissues  
297 (**Table S7**). By contrast, liver showed slightly increased oxygen uptake, which might due to  
298 the slightly (not statistically significant) upregulated oxidative phosphorylation (**Table S7**).  
299 These findings indicate that the changes in oxygen and carbon dioxide fluxes and the  
300 oxidative phosphorylation pathway could serve as a positive control for predicting the  
301 changes due to MI in the fluxes.

302

303 Next, we investigated the tissue-specific metabolic flux changes in the same model (**Table**  
304 **S7**). We found that the pentose phosphate pathway was upregulated in heart 24 hours post MI,  
305 consistent with upregulated glucose metabolism after an MI. Elevated glycolysis could allow  
306 the heart to rapidly generate energy under stress conditions, and the enhanced pentose  
307 phosphate pathway could increase the NADPH level, which could help maintain the level of  
308 reduced glutathione in heart (Tran and Wang, 2019). We also found that adipose tissue  
309 secreted more ketone bodies, including acetoacetate and butyrate, into plasma; the plasma  
310 level of ketone bodies has been reported as a stress marker in acute MI (Miyamoto et al.,  
311 1999). Notably, relatively small metabolic changes were found in liver and skeletal muscle,  
312 which is probably due to the small number of transcriptomic changes in metabolic pathways  
313 in these tissues.

314

315 *Single-cell analysis highlights cell-type patterns among central genes in a heart-specific*  
316 *cluster*

317 We then questioned whether and how our gene set from both central and heart-specific  
318 clusters identified by bulk RNA-seq data would perform at the single cell level. We examined  
319 the DEGs from most central and heart-specific cluster genes in an independent single-cell  
320 dataset of heart failure in human (Wang et al., 2020). We observed that the majority of the  
321 heart-specific genes clustered together in both cardiomyocyte- (CM) and non-CM-enriched  
322 data during heart failure, with higher expression levels in CM-enriched data (**Figure S4**). On  
323 the other hand, the genes from the most central cluster showed no particular clustering  
324 pattern. We also analyzed the clustered tissue-specific genes, and found three distinct groups:  
325 group 1, which consisted of genes related to the TCA cycle, glycolysis and HIF-1 signaling  
326 pathways; group 2, which consisted of genes with higher expression in all cell types and were  
327 related to heart-specific functions and propanoate and pyruvate metabolism; and group 3,  
328 which consisted of genes related to cholesterol and lipid metabolism and cGMP-PKG  
329 signaling pathways.

330

331 Although these gene sets were identified through analysis of bulk RNA-seq data, a clustering  
332 analysis through UMAP (McInnes et al., 2018) highlighted clear distinctions between CM-  
333 and non-CM-enriched data at the single-cell level (**Figure 6A**). We found that CM-enriched  
334 cells (consisting of ~43% smooth muscle cells and ~36% fibroblasts) (**Figure 6B, top left**)  
335 were dominated by the mean expression of genes from the heart-specific cluster (**Figure 6C**),  
336 with very high expression of genes in groups 1 and 2 (**Figure 6D-E**). By contrast, non-CM  
337 cells showed a large heterogeneity in terms of cell type (**Figure 6B, right**). Furthermore, this  
338 cluster showed low mean expression of gene groups 1 and 3, and lower mean expression of  
339 gene group 2 than did CM-enriched cells (**Figure 6D-F**). Approximately 22% of the non-CM  
340 cells were dominated by genes from the most central cluster (**Figure 6C**), whereas 76% of  
341 those cells were endothelial cells. Finally, we observed that the central cluster (**Figure 6C**  
342 **orange**) tended to display overall lower expression of gene group 2 (**Figure 6E bottom**  
343 **right**). Altogether, these observations indicate that heart-specific and central clusters tend to  
344 display distinct patterns of gene expression and distribution among cell subtypes, both in CM  
345 and non-CM-enriched cells.

346

### 347 ***Validating our findings with publicly available datasets***

348 We validated our observations in heart tissue in two independent cohorts of bulk RNA-seq  
349 data from mouse heart (**Table S8**). We filtered both validation cohorts to get and analyzed  
350 only 24 hours post-MI data. We found that there were 2169 DEGs in heart 24 h after  
351 infarction from our data were validated in at least one of the independent cohort (959 in both)  
352 (**Figure 6G**). We also found that 109 out of the 123 most connected genes in our heart-  
353 specific cluster were also significantly differentially expressed in at least one of the  
354 independent cohorts (81 in both). By performing functional analysis of the validation cohorts,  
355 we found that ~61% of GO BP and 84% of KEGG pathways identified in our analysis of the  
356 heart were also present in at least one of the validation cohorts 24 h after infarction (**Figure**  
357 **6H-I**). In both cohorts, we observed downregulation of mitochondrial functions and fatty acid  
358 metabolism processes. We also observed upregulation of processes and pathways related to  
359 retinol metabolism and inflammatory response in both validation cohorts.

360

### 361 ***Identification of driver genes in MI***

362 We observed that *Flnc*, *Lgals3*, *Prkaca* and *Pprc1* showed important response to MI. These  
363 genes were 4 of 16 genes that were DEGs in at least three tissues and validated in both  
364 validation cohorts (**Table S9**). *Flnc*, *Lgals3* and *Pprc1* were upregulated in heart, skeletal  
365 muscle, and adipose, whereas *Prkaca* was downregulated in these three tissues. We further  
366 retrieved their neighbors at each tissue specific CNs, showed their regulations from  
367 differential expression results, and performed functional analysis in **Table S9**.

368

369 *Flnc*, which encodes filamin-C, was part of heart and skeletal muscle-specific CN cluster and  
370 also part of gene group 2 at the single-cell level (**Figure S4**). Its neighbor genes were found to  
371 be significantly (FDR < 0.05) associated to several functions, including TCA cycle, pyruvate  
372 metabolism, glycolysis pathway, and involved in mitochondrial functions. Specifically, they  
373 were related to heart-specific processes in heart, VEGF signaling pathway in muscle,  
374 carbohydrate metabolism in adipose, and to MAPK signaling pathway and muscle contraction  
375 in heart and muscle.

376

377 *Lgals3* (encodes galectin-3) and *Prkaca* were among the most central genes in central clusters  
378 (**Table S6**). The neighbors of *Lgals3* were significantly related to cell cycle and protein  
379 digestion and absorption pathway in all tissues, and to RNA and mRNA related-processes in

380 muscle and adipose tissue. The neighbors of *Prkaca* were related to insulin signaling pathway  
381 in heart and adipose, and several mitochondrial functions in adipose. *Pprc1* was part of most  
382 central clusters in heart and adipose tissue CN, and its neighbors were related to ribosomal  
383 RNA processing and ribosome biogenesis.

384

385 The median expression of these genes at the single-cell level is shown in **Table S9, Figure**  
386 **S5**. We found that all genes were expressed in all cell types in CM and non-CM enriched  
387 cells, except *Pprc1*. In CM cells, *Flnc* showed highest median expression in macrophages,  
388 whilst *Prkaca* showed highest median expression in fibroblasts. *Lgals3* had similar median  
389 expression in all cell types. More heterogeneity was seen in non-CM cells: *Flnc* showed high  
390 median expression in macrophages and fibroblasts, whilst *Lgals3* were observed to have high  
391 median expression in fibroblasts.

392

393

394 **Discussion**

395 CVD has a complex etiology and is responsible for a range of systemic effects, hindering our  
396 understanding of its consequences on different tissues. Here, we took advantage of the  
397 technological advances in high-throughput RNA-seq and applied integrative network analyses  
398 to comprehensively explore the underlying biological effects of MI. Specifically, we  
399 generated RNA-seq data from heart, liver, skeletal muscle and adipose tissue obtained from  
400 mice 6 and 24 h after an MI or sham operation. We used transcriptomics data analyses  
401 (differential expression, functional analysis, and reporter metabolites analysis) to determine  
402 the systemic effects of the MI across multiple tissues. Moreover, we performed CN analyses  
403 to pinpoint important key and tissue-specific clusters in each tissue, and identified the key  
404 genes in each cluster. Finally, we used a whole-body modelling approach to identify the  
405 crosstalk between tissues and reveal the global metabolic alterations, before finally validating  
406 our findings with publicly available independent MI cohorts.

407  
408 Based on our analyses, we observed downregulation of heart-specific functions and  
409 upregulation of lipid metabolism and inflammatory response in heart, muscle, and adipose  
410 tissue after an MI (**Figure 4B**). Liver showed a distinct response with respect to the other  
411 three tissues, including downregulation of inflammatory response. We observed that fatty acid  
412 metabolism was downregulated in heart and adipose tissue, whereas fatty acid beta-oxidation  
413 was upregulated and glutathione metabolism was downregulated in liver. We also observed  
414 upregulation of oxidative stress in heart and skeletal muscle. We also observed  
415 downregulation of mitochondrial functions in heart, muscle, and adipose tissue. Furthermore,  
416 we found upregulation of retinol metabolism in heart and downregulation of retinol  
417 metabolites in liver (**Figure 4B**).

418  
419 We hypothesized that downregulation of fatty acid metabolism from adipose tissue was due to  
420 exchange of fatty acids with other tissues (liver and muscle) (**Figure 4B**). We also observed  
421 the flow of retinol from liver to heart during MI, consistent with previous reports (Palace et  
422 al., 1999). These MI-associated alterations lead to dysfunctional mitochondria and decreased  
423 energy production, especially in heart and skeletal muscle.

424  
425 We further examined our results with single cell RNA-seq data. Although our gene set was  
426 extracted from bulk RNA-seq data analysis, it still had a strong presence at the single cell

427 RNA level, in both CM and NCM cells. We also validated our results with publicly available  
428 MI datasets generated in separate independent studies. The validation results strengthened our  
429 findings on the altered functions/pathways and the important heart-specific genes after an MI.  
430

431 Importantly, our analyses of gene clusters highlighted multiple key genes in the response to  
432 MI in different tissues. Specifically, we observed that *Flnc*, *Prkaca*, *Lgals3*, and *Pprc1*  
433 showed important responses in heart, skeletal muscle, and adipose tissue. Moreover, *Flnc*,  
434 *Lgals3*, and *Prkaca* showed strong presence at the single cell level. *Flnc* is involved in actin  
435 cytoskeleton organization in heart and skeletal muscle, and previous studies have shown that  
436 this gene has critical role in CVD (Hall et al., 2020; Zhou et al., 2020). Similarly, *Prkaca*, an  
437 important metabolic gene, has also been shown to play an important function during CVD  
438 (Bers, 2008; Diviani et al., 2011; Turnham and Scott, 2016). *Lgals3*, related to acute  
439 inflammation response, has been studied intensively in recent years as a key gene in CVD,  
440 and as a potential CVD therapy target (Suthahar et al., 2018; Zhong et al., 2019). Lastly,  
441 *Pprc1*, as important regulator of mitochondrial biogenesis, has not been explored for its direct  
442 relationship with CVD; however, mitochondrial biogenesis appears to be an important  
443 response to CVD (Piantadosi and Suliman, 2012; Ren et al., 2010; Siasos et al., 2018).  
444

445 In summary, we systematically unveiled the deregulation of biological processes and  
446 pathways that resulted from MI in heart, liver, muscle, and adipose tissue by integrating  
447 transcriptomic data and the use of biological networks. We also identified the key clusters and  
448 central genes using generated tissue-specific CNs. In this study, we demonstrated a strategy to  
449 utilize multi-tissue transcriptomic data to identify alteration of biological processes and  
450 pathways to systemically explore the effect of a disease.

451

#### 452 **Limitation of the Study**

453 We recognized several limitations to be noted on this research. First, only transcriptomic data  
454 was analyzed in this research, hence the sensitivity might be limited especially for short  
455 timepoint, e.g. 6 hours after MI. Second, we focused our analysis in this research only on  
456 protein-coding genes. Third, to explore more about the shift in metabolism due to MI, longer  
457 timepoints needs to be explored. This opens new opportunities for future research, including  
458 analyzing the non-protein-coding gene signatures and longer timepoints.

459



460 **Author Contribution**

461 MK performed the animal experiments, MA performed the computational analysis and  
462 analyzed the clinical data together with RB, SD, HT, MU, MC, JW, DE, CZ, AM, and JB  
463 coordinated the generation of the clinical data. MA, MK, AM and JB wrote the paper and all  
464 authors were involved in editing the paper.

465

466 **Acknowledgements**

467 This work was financially supported by the Knut and Alice Wallenberg Foundation, Swedish  
468 Research Foundation and Swedish Heart-Lung Foundation.

469

470 **Conflict of Interest**

471 JW, MC, DE are employees at AstraZeneca. The other authors declare no conflict of interest.

472

## 473 **Figure Legends**

474 **Figure 1** (A) Overview of this study (B) Number of differentially expressed genes for each  
475 tissue at each time point. Effect of MI shown to be more pronounced after 24 h. (C) UpSet  
476 plot to show intersection between differentially expressed genes ( $FDR < 5\%$ ) in different  
477 tissues. The plot showed that each tissue has its specific set of genes that were affected by MI.  
478 (D) KEGG pathway analysis ( $FDR < 0.05$  in at least 3 tissues) for 24 hours post MI  
479 compared to its control for each tissue. We observed that 141 (5 upregulated) and 125 (14  
480 upregulated) pathways are significantly altered in heart 6 and 24 h after infarction,  
481 respectively. For other tissues, we found that 24 (9 upregulated), 61 (54 upregulated) and 48  
482 (15 upregulated) pathways are altered in liver, muscle, and adipose, respectively.

483 **Figure 2** (A) Functional analysis with GO ( $FDR < 0.05\%$  in at least 3 tissues) revealed that  
484 944 (919 upregulated) and 1019 (970 upregulation) BPs are significantly altered in heart 6  
485 and 24 h after infarction, respectively. The results also showed 38 (16 upregulated), 376 (357  
486 upregulated) and 193 (116 upregulated) BPs are significantly altered 24 h after infarction in  
487 liver, muscle and adipose, respectively. Most tissues show significant alterations in multiple  
488 biological processes, including mitochondrial functions, RNA processes, cell adhesion,  
489 ribosome and immune systems. The results of this analysis showed alterations concordant  
490 with those observed for KEGG pathways. (B) Reporter metabolites analysis shows significant  
491 alternation in important metabolites. Our analysis revealed that 169, 324, 118 and 51  
492 reporter metabolites are significantly altered in heart, liver, skeletal muscle and adipose  
493 tissues, respectively, at 24 h post-infarction (Table S4)

494 **Figure 3** Network analyses. (A) Heart co-expression network clusters with superimposed  
495 DEGs 24 h post-infarction (Blue = down-regulated, Red = up-regulated) marked with the  
496 cluster numbers. The edges between the clusters were aggregation of the inter-cluster edges  
497 (B) Liver. (C) Muscle. (D) Adipose. (E) Intersection of the most central clusters in all tissues  
498 shows that the central architecture of the network was conserved in all tissues. We found 4  
499 sub-clusters within the network intersection. Top 10 most connected genes are marked in  
500 black. (F) Enriched GO BP in heart-specific cluster generated by Revigo.

501

502 **Figure 4** (A) Similarity of functions in the most central cluster and specific functions of each  
503 tissue-specific cluster. (B) Functional analysis for each tissue and hypothesized flow of  
504 metabolites

505 **Figure 5** (A) Significantly differentially expressed central genes of each tissue-specific cluster  
506 to fatty acid metabolism, as one of the most affected metabolic process. (B) Lipid metabolism.  
507 Red = upregulated, blue = downregulated.

508 **Figure 6** (A-C) UMAP clustering of the single cell RNA-seq data with our gene set based on  
509 the CM enrichment, cell types, and network gene cluster type (D-F) colored based on the  
510 mean expression of the gene groups (G) DEGs intersection of our data and validation cohort  
511 (H) & (I) Intersection of functional analysis results (GO BP and KEGG Pathways) of our  
512 data and validation cohort  
513

514 **Table**

515 *Table 1 Properties of the co-expression network*

| Tissue  | # of Genes | # of Edges | # of Clusters | Modularity Scores |
|---------|------------|------------|---------------|-------------------|
| Heart   | 8793       | 1570898    | 7             | 0.540179085       |
| Liver   | 7760       | 1103589    | 6             | 0.577273459       |
| Muscle  | 8834       | 1660603    | 7             | 0.521239124       |
| Adipose | 10790      | 2636378    | 8             | 0.495469439       |

516

517 **STAR Methods**

518 ***Induction of MI***

519 10-week-old male C57Bl/6N mice were fasted for 4 h before induction of myocardial  
520 infarction. The mice were then anesthetized with isoflurane, orally intubated, and connected  
521 to a small-animal ventilator (SAR-830, Geneq, Montreal, Canada) distributing a mixture of  
522 oxygen, air and 2–3% isoflurane. ECG electrodes were placed on the extremities, and cardiac  
523 rhythm was monitored during surgery. An incision was made between the 4th and 5th ribs to  
524 reveal the upper part of the anterior left ventricle (LV) wall and the lower part of the left  
525 atrium. Myocardial infarction was induced by ligating the left anterior descending (LAD)  
526 coronary artery immediately after the bifurcation of the left coronary artery 1. The efficacy of  
527 the procedure was immediately verified by characteristic ECG changes, and akinesis of the  
528 LV anterior wall. After verification of the infarction, the lungs were hyperinflated, positive  
529 end-expiratory pressure was applied, and the chest was closed. Sham mice were handled  
530 identically, but no ligation of the LAD coronary artery was performed (and thus, no ischemia  
531 was induced in these mice). The mice received an intraperitoneal injection of 0.1 ml  
532 buprenorphine to relieve postoperative pain and were allowed to recover spontaneously after  
533 stopping isoflurane administration. Mice were killed with an overdose of isoflurane 6 h or 24  
534 h after occlusion or sham operation. We collected the left ventricle (the whole left ventricle  
535 containing mainly infarcted tissue) of the heart, whereas white adipose tissue (WAT) was  
536 collected from the abdomen and musculus soleus was taken as the muscle tissue. Mouse  
537 hearts and biopsies from the liver, muscle and WAT were snap-frozen in liquid nitrogen and  
538 stored at -80°C until analysis. All mice studies were approved by the local animal ethics  
539 committee and conform to the guidelines from Directive 2010/63/EU of the European  
540 Parliament on the protection of animals used for scientific purposes.

541

542 ***Echocardiography in mice***

543 Echocardiographic examination, using VisualSonics VEVO 2100 system (VisualSonics Inc,  
544 Ontario, Canada), which includes an integrated rail system for consistent positioning of the  
545 ultrasound probe was performed 6 and 24 h after an MI to determine the size of the MI. We  
546 calculated infarct size based on wall motion score index (WMSI) 24 h after myocardial  
547 infarction by a 16-segments model on 3 short axis images, as 0 for normal, ½ for reduced wall  
548 thickening and excursion in a segment and 1 for no wall thickening and excursion in a  
549 segment. WMSI was calculated as the sum of scores divided by the total number of segments.

550 Hair removal gel was applied to isoflurane-anesthetized (1.2%) mice chest to minimize  
551 resistance to ultrasonic beam transmission. The mice were then placed on a heating pad and  
552 extremities were connected to an ECG. A 55 MHz linear transducer (MS550D) was used for  
553 imaging. An optimal parasternal long axis (LAX) cine loop of >1000 frames/s was acquired  
554 using the ECG-gated kilohertz visualization technique. Parasternal short axis cine-loops were  
555 acquired at 1, 3, and 5 mm below the mitral annulus. Infarct size was calculated based on wall  
556 motion score index 6 and 24 hours after myocardial infarction by a 16-segments model on  
557 LAX and 3 short axis images view, as 0 for normal, ½ for reduced wall thickening and  
558 excursion in a segment and 1 for no wall thickening and excursion in a segment. The data  
559 were evaluated using VevoStrain™ software system (VisualSonics Inc, Ontario, Canada).

560

### 561 ***RNA extraction and sequencing***

562 Total RNA was isolated from homogenized heart tissue using RNeasy Fibrous Tissue Mini  
563 Kit (Qiagen). cDNA was synthesized with the high-capacity cDNA Reverse Transcription Kit  
564 (Applied Biosystems) and random primers. mRNA expression of genes of interest was  
565 analyzed with TaqMan real-time PCR in a ViiA™ 7 system (Applied Biosystems). RNA  
566 sequencing library were prepared with Illumina RNA-Seq with Poly-A selections.  
567 Subsequently, the libraries were sequenced on NovaSeq6000 (NovaSeq Control Software  
568 1.6.0/RNA v3.4.4) with a 2x51 setup using ‘NovaSeqXp’ workflow in ‘S1’ mode flow cell.  
569 The Bcl was converted to FastQ by bcl2fastq\_v2.19.1.403 from CASAVA software suite  
570 (Sanger/phred33/Illumina 1.8+ quality scale).

571

### 572 ***RNA-sequencing data analysis***

573 The raw RNA-sequencing results were processed using Kallisto (Bray et al., 2016) with index  
574 file generated from the Ensembl mouse reference genome (Release-96) (Zerbino et al., 2017).  
575 The output from Kallisto, both estimated count and TPM (Transcript per kilobase million),  
576 were subsequently mapped to gene using the mapping file retrieved from Ensembl BioMart  
577 website, by filtering only protein coding genes and transcripts. Genes with mean expression  
578 less than 1 TPM in each condition were filtered. For data exploration, we used PCA from  
579 sklearn package (Pedregosa et al., 2011) in Python 3.7 and used TPM values as the input.  
580 Subsequently, we performed differential gene expression analysis using DESeq2 package in  
581 R. We utilized the capabilities from DESeq2 to normalize the rounded estimated count data  
582 and to correct for confounding factors (such as time). To define a gene as differentially

583 expressed (DEGs), a gene has to fulfill a criterion of  $FDR < 5\%$ . The results of differential  
584 expression analysis were then used for functional analysis.

585

586 We checked the tissue specificity of the DEGs in each tissue with the data from Mouse Gene  
587 Atlas (Su et al., 2004). For all the tissue-specific genes, we also checked their human-  
588 homolog genes in the human secretome database (Uhlén et al., 2019).

589

### 590 ***Functional analysis***

591 We performed functional analysis using the R package PIANO (Väremo et al., 2013). As the  
592 input, we used the fold changes and p-values from the DESeq2, and also GO BP and KEGG  
593 pathways gene-set collections from Enrichr (Chen et al., 2013; Kuleshov et al., 2016), and  
594 metabolites from Mouse Metabolic Reaction database (Mardinoglu et al., 2015). To define a  
595 process or pathway as significant, we used a cut off of  $FDR < 5\%$  for the distinct direction of  
596 PIANO (both up and down).

597

### 598 ***Co-expression network generation***

599 We generated the co-expression network by generating gene-gene Spearman correlation ranks  
600 within a tissue type, using *spearmanr* function from SciPy (Jones et al., 2001) in Python 3.7.  
601 Using the same environment, we performed multiple hypothesis testing using Benjamini-  
602 Hochberg method from *statsmodels* (Perktold et al., 2017). Correlation data were filtered with  
603 criterion of adjusted p-value  $< 5\%$ .

604

605 The top 5% of filtered correlation results were then loaded into iGraph module (Csardi and  
606 Nepusz, 2006) in Python 3.7 as an unweighted network. To find the subnetworks, we  
607 employed the Leiden clustering algorithm (Traag et al., 2019) with *ModularityVertexPartition*  
608 method. Each cluster was analyzed by using Enrichr (Chen et al., 2013; Kuleshov et al., 2016)  
609 to get the enriched GO BP and KEGG pathways. Criterion  $FDR < 0.05$  were used to find the  
610 significantly enriched terms. Clusters with less than 30 genes were discarded, to be able to get  
611 significant functional analysis results. Since GO BP was relatively sparse, we used Revigo  
612 (Supek et al., 2011) to summarize the GO BP into a higher level. Revigo was further  
613 employed to build a GO BP network. Clustering coefficient was calculated based on the  
614 average local clustering coefficient function within iGraph.

615

## 616 ***Multi-tissue metabolic modeling***

617 We combined tissue-specific models (of heart, liver, muscle, adipose and small intestine)  
618 constructed previously (Mardinoglu et al., 2015) in a multi-tissue model by adding an  
619 additional compartment representing the plasma, which allows the exchange of metabolites  
620 among different tissues. Blocked reactions that could not carry fluxes (and the unused  
621 metabolites and genes linked to these reactions) were removed from the models. In addition,  
622 the dietary input reactions and constraints were added to the small intestine model to simulate  
623 the food intake (**Table S7**). Specifically, we assumed that the mice weighed 30 g and  
624 consumed 4.5 g chow diet per day (15 g/100 g body weight) based on a previous study  
625 (Kummitha et al., 2014). We also calculated the tissue-specific resting energy expenditures  
626 and set them as mandatory metabolic constraints based on previous studies and resting energy  
627 expenditure for other tissues was incorporated by including a mandatory glucose secretion  
628 flux out from the system with the lower bound calculated based on ATP (**Table S7**)  
629 (Kummitha et al., 2014).

630

631 To simulate the metabolic flux distribution in the sham-operated mice, we set the lipid droplet  
632 accumulation reaction in adipose tissue (m3\_Adipose\_LD\_pool) as the objective function so  
633 that the energy additional to the resting energy expenditure will be stored as fat; we used  
634 parsimonious FBA to calculate the flux distribution. To simulate the flux distribution after an  
635 MI, we used the previously developed method Relative Metabolic Difference ver. 2  
636 (RMetD2) (Zhang et al., 2019) to integrate transcriptomic data. In brief, RMetD2 calculates  
637 the expected fluxes of reactions based on their reference fluxes and fold changes of gene  
638 expression, and searches for a flux distribution that is close to the expected fluxes while  
639 subject to the model constraints.

640

## 641 ***Validation of the results***

642 We validated our findings by performing similar steps of RNA sequencing and functional  
643 analysis for the publicly available mouse MI datasets GSE104187 and GSE52313 (Ounzain et  
644 al., 2014; Williams et al., 2018). Single-cell RNA-seq human data for heart failure was  
645 retrieved from GSE109816 (Wang et al., 2020). Hierarchical clustering of the single-cell data  
646 was performed with *clustermap* function from *seaborn* module in Python.

647



648 ***Data and code availability***

649 All raw RNA-sequencing data generated from this study can be accessed through accession  
650 number GSE153485. Codes used during the analysis are available on  
651 [https://github.com/sysmedicine/ArifEtAl\\_2020\\_MultiTissueMI](https://github.com/sysmedicine/ArifEtAl_2020_MultiTissueMI)

652 **Supplementary Tables**

653 *Table S1 Differential Expression Analysis Results*

654 *Table S2 KEGG Pathways*

655 *Table S3 Gene Ontology Biological Processes*

656 *Table S4 DEG comparison between Liver and other tissues*

657 *Table S5 Reporter Metabolite Analysis*

658 *Table S6 Enrichment Analyses of Clusters, Clusters properties*

659 *Table S7 Food Intake, Energy Expenditure, and Flux Balance Analysis (FBA) of Whole-Body*  
660 *Modeling*

661 *Table S8 Validation Result (Differential Expression and Functional Analysis)*

662 *Table S9 Detailed Information of 16 Key Genes that are DEGs in at least 3 tissues,*  
663 *Neighbors and Functional Analysis Results of The Neighbors of 4 key genes, and mean*  
664 *expression of 4 key genes in each cell-type in the scRNA data.*

665

## 666 **References**

- 667 Alexander, M., Loomis, A.K., van der Lei, J., Duarte-Salles, T., Prieto-Alhambra, D., Ansell,  
668 D., Pasqua, A., Lapi, F., Rijnbeek, P., and Mosseveld, M. (2019). Non-alcoholic fatty liver  
669 disease and risk of incident acute myocardial infarction and stroke: findings from matched  
670 cohort study of 18 million European adults. *bmj* *367*, 15367.
- 671 Bakhtiarzadeh, M.R., Hosseinpour, B., Shahhoseini, M., Korte, A., and Gifani, P. (2018).  
672 Weighted Gene Co-expression Network Analysis of Endometriosis and Identification of  
673 Functional Modules Associated With Its Main Hallmarks. *Frontiers in Genetics* *9*.
- 674 Benfeitas, R., Bidkhori, G., Mukhopadhyay, B., Klevstig, M., Arif, M., Zhang, C., Lee, S.,  
675 Cinar, R., Nielsen, J., and Uhlen, M. (2019). Characterization of heterogeneous redox  
676 responses in hepatocellular carcinoma patients using network analysis. *EBioMedicine* *40*,  
677 471-487.
- 678 Bers, D.M. (2008). Calcium cycling and signaling in cardiac myocytes. *Annu Rev Physiol* *70*,  
679 23-49.
- 680 Bidkhori, G., Benfeitas, R., Klevstig, M., Zhang, C., Nielsen, J., Uhlen, M., Boren, J., and  
681 Mardinoglu, A. (2018). Metabolic network-based stratification of hepatocellular carcinoma  
682 reveals three distinct tumor subtypes. *Proceedings of the National Academy of Sciences* *115*,  
683 E11874-E11883.
- 684 Bray, N.L., Pimentel, H., Melsted, P., and Pachter, L. (2016). Near-optimal probabilistic  
685 RNA-seq quantification. *Nature biotechnology* *34*, 525.
- 686 Camara, A.K., Zhou, Y., Wen, P.-C., Tajkhorshid, E., and Kwok, W.-M. (2017).  
687 Mitochondrial VDAC1: a key gatekeeper as potential therapeutic target. *Frontiers in*  
688 *physiology* *8*, 460.
- 689 Chen, E.Y., Tan, C.M., Kou, Y., Duan, Q., Wang, Z., Meirelles, G.V., Clark, N.R., and  
690 Ma'ayan, A. (2013). Enrichr: interactive and collaborative HTML5 gene list enrichment  
691 analysis tool. *BMC Bioinformatics* *14*, 128.
- 692 Csardi, G., and Nepusz, T. (2006). The igraph software package for complex network  
693 research. *InterJournal, Complex Systems* *1695*, 1-9.
- 694 Das, S., Frisk, C., Eriksson, M.J., Walentinsson, A., Corbascio, M., Hage, C., Kumar, C.,  
695 Asp, M., Lundeberg, J., and Maret, E. (2019). Transcriptomics of cardiac biopsies reveals  
696 differences in patients with or without diagnostic parameters for heart failure with preserved  
697 ejection fraction. *Scientific reports* *9*, 3179.
- 698 Diviani, D., Dodge-Kafka, K.L., Li, J., and Kamiloff, M.S. (2011). A-kinase anchoring  
699 proteins: scaffolding proteins in the heart. *American Journal of Physiology-Heart and*  
700 *Circulatory Physiology* *301*, H1742-H1753.
- 701 Hall, C.L., Gurha, P., Sabater-Molina, M., Asimaki, A., Futema, M., Lovering, R.C., Suárez,  
702 M.P., Aguilera, B., Molina, P., and Zorio, E. (2020). RNA sequencing-based transcriptome  
703 profiling of cardiac tissue implicates novel putative disease mechanisms in FLNC-associated  
704 arrhythmogenic cardiomyopathy. *International journal of cardiology* *302*, 124-130.
- 705 Jones, E., Oliphant, T., and Peterson, P. (2001). SciPy: Open source scientific tools for  
706 Python.
- 707 Kiyuna, L.A., e Albuquerque, R.P., Chen, C.-H., Mochly-Rosen, D., and Ferreira, J.C.B.  
708 (2018). Targeting mitochondrial dysfunction and oxidative stress in heart failure: challenges  
709 and opportunities. *Free Radical Biology and Medicine* *129*, 155-168.

- 710 Kuleshov, M.V., Jones, M.R., Rouillard, A.D., Fernandez, N.F., Duan, Q., Wang, Z., Koplev,  
711 S., Jenkins, S.L., Jagodnik, K.M., Lachmann, A., *et al.* (2016). Enrichr: a comprehensive gene  
712 set enrichment analysis web server 2016 update. *Nucleic Acids Research* *44*, W90-W97.
- 713 Kummitha, C.M., Kalhan, S.C., Saidel, G.M., and Lai, N. (2014). Relating tissue/organ  
714 energy expenditure to metabolic fluxes in mouse and human: experimental data integrated  
715 with mathematical modeling. *Physiological reports* *2*.
- 716 Lee, S., Zhang, C., Kilicarslan, M., Piening, B.D., Bjornson, E., Hallström, B.M., Groen,  
717 A.K., Ferrannini, E., Laakso, M., and Snyder, M. (2016). Integrated network analysis reveals  
718 an association between plasma mannose levels and insulin resistance. *Cell metabolism* *24*,  
719 172-184.
- 720 Lee, S., Zhang, C., Liu, Z., Klevstig, M., Mukhopadhyay, B., Bergentall, M., Cinar, R.,  
721 Ståhlman, M., Sikanic, N., and Park, J.K. (2017). Network analyses identify liver-specific  
722 targets for treating liver diseases. *Molecular systems biology* *13*.
- 723 Lex, A., Gehlenborg, N., Strobel, H., Vuilleumot, R., and Pfister, H. (2014). UpSet:  
724 visualization of intersecting sets. *IEEE transactions on visualization and computer graphics*  
725 *20*, 1983-1992.
- 726 Lima, I., Peres, W., Cruz, S., and Ramalho, A. (2018). Association of Ischemic  
727 Cardiovascular Disease with Inadequacy of Liver Store of Retinol in Elderly Individuals.  
728 *Oxidative medicine and cellular longevity* *2018*.
- 729 Mardinoglu, A., Bjornson, E., Zhang, C., Klevstig, M., Söderlund, S., Ståhlman, M., Adiels,  
730 M., Hakkarainen, A., Lundbom, N., and Kilicarslan, M. (2017a). Personal model-assisted  
731 identification of NAD<sup>+</sup> and glutathione metabolism as intervention target in NAFLD.  
732 *Molecular systems biology* *13*.
- 733 Mardinoglu, A., Boren, J., Smith, U., Uhlen, M., and Nielsen, J. (2017b). The employment of  
734 systems biology in gastroenterology and hepatology. *Nat Rev Gastroenterol Hepatol*.
- 735 Mardinoglu, A., and Nielsen, J. (2015). New paradigms for metabolic modeling of human  
736 cells. *Current Opinion in Biotechnology* *34*, 91-97.
- 737 Mardinoglu, A., Shoaie, S., Bergentall, M., Ghaffari, P., Zhang, C., Larsson, E., Bäckhed, F.,  
738 and Nielsen, J. (2015). The gut microbiota modulates host amino acid and glutathione  
739 metabolism in mice. *Molecular Systems Biology* *11*, 834.
- 740 McInnes, L., Healy, J., and Melville, J. (2018). Umap: Uniform manifold approximation and  
741 projection for dimension reduction. arXiv preprint arXiv:180203426.
- 742 Miyamoto, T., Katayama, Y., and Harano, Y. (1999). Blood ketone body as a stress marker in  
743 acute myocardial infarction. *Nihon Kyukyu Igakukai Zasshi* *10*, 621-622.
- 744 Mukund, K., and Subramaniam, S. (2017). Co-expression network approach reveals  
745 functional similarities among diseases affecting human skeletal muscle. *Frontiers in*  
746 *physiology* *8*, 980.
- 747 Nielsen, J. (2017). Systems biology of metabolism: a driver for developing personalized and  
748 precision medicine. *Cell metabolism* *25*, 572-579.
- 749 Ounzain, S., Micheletti, R., Beckmann, T., Schroen, B., Alexanian, M., Pezzuto, I., Crippa,  
750 S., Nemir, M., Sarre, A., and Johnson, R. (2014). Genome-wide profiling of the cardiac  
751 transcriptome after myocardial infarction identifies novel heart-specific long non-coding  
752 RNAs. *European heart journal* *36*, 353-368.

- 753 Palace, V.P., Hill, M.F., Khaper, N., and Singal, P.K. (1999). Metabolism of vitamin A in the  
754 heart increases after a myocardial infarction. *Free Radical Biology and Medicine* 26, 1501-  
755 1507.
- 756 Palaniyandi, S.S., Qi, X., Yogalingam, G., Ferreira, J.C.B., and Mochly-Rosen, D. (2010).  
757 Regulation of mitochondrial processes: a target for heart failure. *Drug Discovery Today:*  
758 *Disease Mechanisms* 7, e95-e102.
- 759 Pedregosa, F., Varoquaux, G., Gramfort, A., Michel, V., Thirion, B., Grisel, O., Blondel, M.,  
760 Prettenhofer, P., Weiss, R., and Dubourg, V. (2011). Scikit-learn: Machine learning in  
761 Python. *Journal of machine learning research* 12, 2825-2830.
- 762 Pedrotty, D.M., Morley, M.P., and Cappola, T.P. (2012). Transcriptomic biomarkers of  
763 cardiovascular disease. *Progress in cardiovascular diseases* 55, 64-69.
- 764 Perktold, J., Seabold, S., and Taylor, J. (2017). *Statsmodels: Statistics in python* (Oct).
- 765 Piantadosi, C.A., and Suliman, H.B. (2012). Transcriptional control of mitochondrial  
766 biogenesis and its interface with inflammatory processes. *Biochimica et Biophysica Acta*  
767 (BBA)-General Subjects 1820, 532-541.
- 768 Priest, C., and Tontonoz, P. (2019). Inter-organ cross-talk in metabolic syndrome. *Nature*  
769 *Metabolism*.
- 770 Ren, J., Pulakat, L., Whaley-Connell, A., and Sowers, J.R. (2010). Mitochondrial biogenesis  
771 in the metabolic syndrome and cardiovascular disease. *Journal of molecular medicine* 88,  
772 993-1001.
- 773 Schwertz, H., Carter, J.M., Abdudurehman, M., Russ, M., Buerke, U., Schlitt, A., Müller-  
774 Werdan, U., Prondzinsky, R., Werdan, K., and Buerke, M. (2007). Myocardial  
775 ischemia/reperfusion causes VDAC phosphorylation which is reduced by cardioprotection  
776 with a p38 MAP kinase inhibitor. *PROTEOMICS* 7, 4579-4588.
- 777 Siasos, G., Tsigkou, V., Kosmopoulos, M., Theodosiadis, D., Simantiris, S., Tagkou, N.M.,  
778 Tsimpiktsioglou, A., Stampouloglou, P.K., Oikonomou, E., and Mourouzis, K. (2018).  
779 Mitochondria and cardiovascular diseases—from pathophysiology to treatment. *Annals of*  
780 *translational medicine* 6.
- 781 Su, A.I., Wiltshire, T., Batalov, S., Lapp, H., Ching, K.A., Block, D., Zhang, J., Soden, R.,  
782 Hayakawa, M., Kreiman, G., *et al.* (2004). A gene atlas of the mouse and human protein-  
783 encoding transcriptomes. *Proceedings of the National Academy of Sciences of the United*  
784 *States of America* 101, 6062-6067.
- 785 Sun, W., Quan, N., Wang, L., Yang, H., Chu, D., Liu, Q., Zhao, X., Leng, J., and Li, J.  
786 (2016). Cardiac-specific deletion of the *Pdha1* gene sensitizes heart to toxicological actions of  
787 ischemic stress. *Toxicological Sciences* 151, 193-203.
- 788 Supek, F., Bošnjak, M., Škunca, N., and Šmuc, T. (2011). REVIGO summarizes and  
789 visualizes long lists of gene ontology terms. *PloS one* 6, e21800.
- 790 Suthahar, N., Meijers, W.C., Silljé, H.H., Ho, J.E., Liu, F.-T., and de Boer, R.A. (2018).  
791 Galectin-3 activation and inhibition in heart failure and cardiovascular disease: an update.  
792 *Theranostics* 8, 593.
- 793 Traag, V.A., Waltman, L., and van Eck, N.J. (2019). From Louvain to Leiden: guaranteeing  
794 well-connected communities. *Scientific reports* 9.
- 795 Tran, D.H., and Wang, Z.V. (2019). Glucose Metabolism in Cardiac Hypertrophy and Heart  
796 Failure. *Journal of the American Heart Association* 8, e012673.

- 797 Turanli, B., Zhang, C., Kim, W., Benfeitas, R., Uhlen, M., Arga, K.Y., and Mardinoglu, A.  
798 (2019). Discovery of therapeutic agents for prostate cancer using genome-scale metabolic  
799 modeling and drug repositioning. *EBioMedicine* *42*, 386-396.
- 800 Turnham, R.E., and Scott, J.D. (2016). Protein kinase A catalytic subunit isoform PRKACA;  
801 History, function and physiology. *Gene* *577*, 101-108.
- 802 Uhlén, M., Karlsson, M.J., Hober, A., Svensson, A.-S., Scheffel, J., Kotol, D., Zhong, W.,  
803 Tebani, A., Strandberg, L., Edfors, F., *et al.* (2019). The human secretome. *Science Signaling*  
804 *12*, eaaz0274.
- 805 Våremo, L., Nielsen, J., and Nookaew, I. (2013). Enriching the gene set analysis of genome-  
806 wide data by incorporating directionality of gene expression and combining statistical  
807 hypotheses and methods. *Nucleic Acids Research* *41*, 4378-4391.
- 808 Wang, L., Yu, P., Zhou, B., Song, J., Li, Z., Zhang, M., Guo, G., Wang, Y., Chen, X., and  
809 Han, L. (2020). Single-cell reconstruction of the adult human heart during heart failure and  
810 recovery reveals the cellular landscape underlying cardiac function. *Nature Cell Biology* *22*,  
811 108-119.
- 812 WHO (2019). Cardiovascular diseases (CVDs) Fact sheets.
- 813 Williams, A.L., Khadka, V., Tang, M., Avelar, A., Schunke, K.J., Menor, M., and Shohet,  
814 R.V. (2018). HIF1 mediates a switch in pyruvate kinase isoforms after myocardial infarction.  
815 *Physiological genomics* *50*, 479-494.
- 816 Yada, T., Shimokawa, H., Hiramatsu, O., Haruna, Y., Morita, Y., Kashihara, N., Shinozaki,  
817 Y., Mori, H., Goto, M., and Ogasawara, Y. (2006). Cardioprotective role of endogenous  
818 hydrogen peroxide during ischemia-reperfusion injury in canine coronary microcirculation in  
819 vivo. *American Journal of Physiology-Heart and Circulatory Physiology* *291*, H1138-H1146.
- 820 Zerbino, D.R., Achuthan, P., Akanni, W., Amode, M R., Barrell, D., Bhai, J., Billis, K.,  
821 Cummins, C., Gall, A., Girón, C.G., *et al.* (2017). Ensembl 2018. *Nucleic Acids Research* *46*,  
822 D754-D761.
- 823 Zhang, C., Lee, S., Bidkhorji, G., Benfeitas, R., Lovric, A., Chen, S., Uhlen, M., Nielsen, J.,  
824 and Mardinoglu, A. (2019). RMetD2: a tool for integration of relative transcriptomics data  
825 into Genome-scale metabolic models. *BioRxiv*, 663096.
- 826 Zhong, X., Qian, X., Chen, G., and Song, X. (2019). The role of galectin-3 in heart failure  
827 and cardiovascular disease. *Clinical and Experimental Pharmacology and Physiology* *46*, 197-  
828 203.
- 829 Zhou, Y., Chen, Z.e., Zhang, L., Zhu, M., Tan, C., Zhou, X., Evans, S.M., Fang, X., Feng, W.,  
830 and Chen, J. (2020). Loss of Filamin C Is Catastrophic for Heart Function. *Circulation* *141*,  
831 869-871.
- 832

**A**

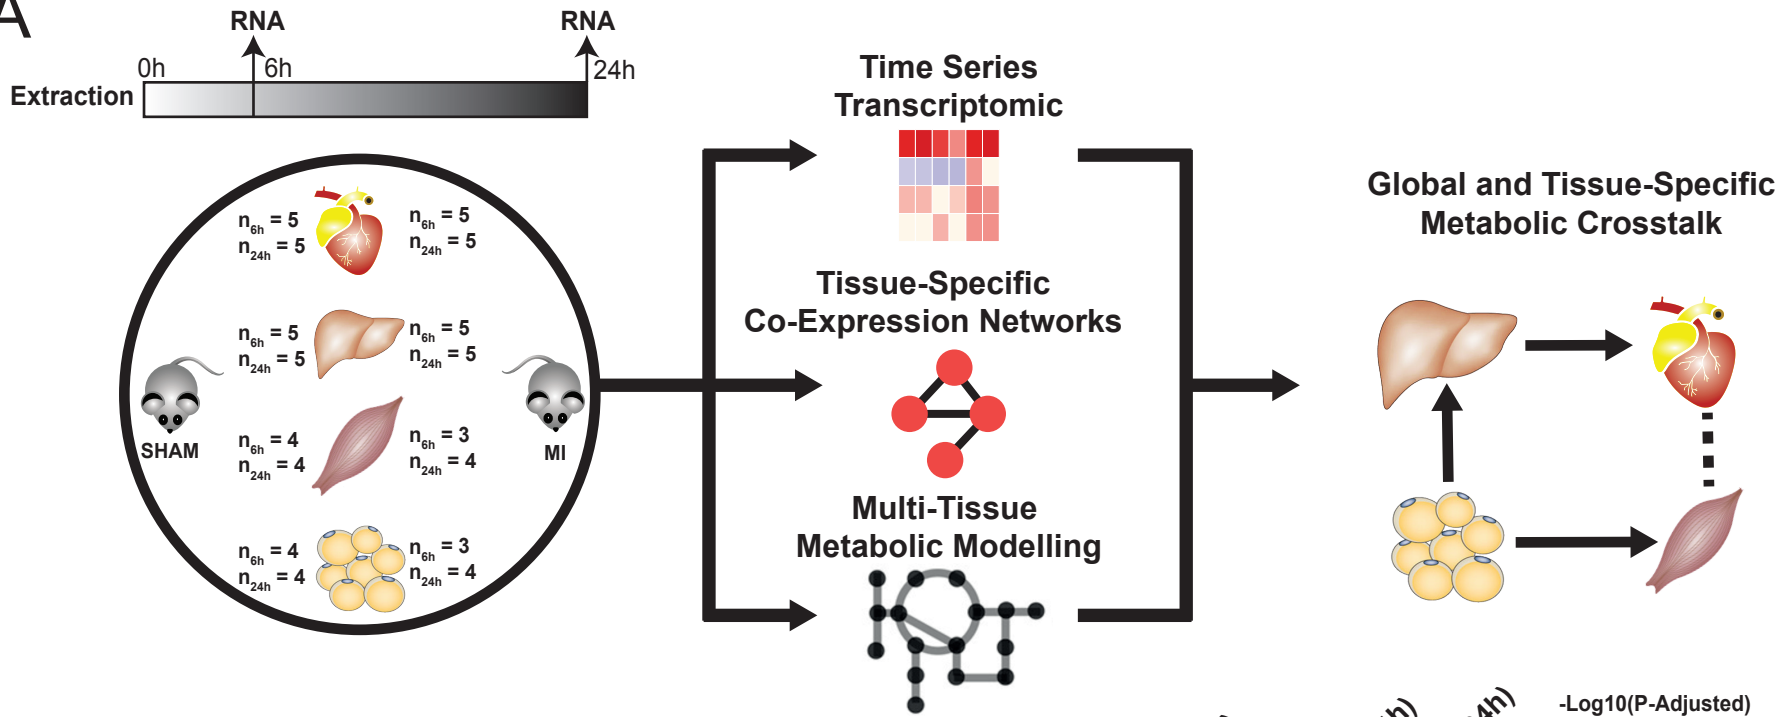

**B**

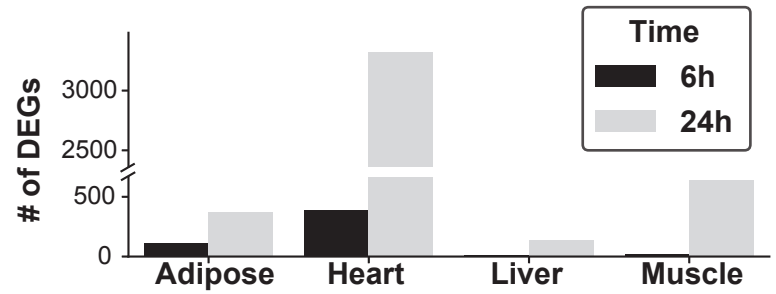

**C**

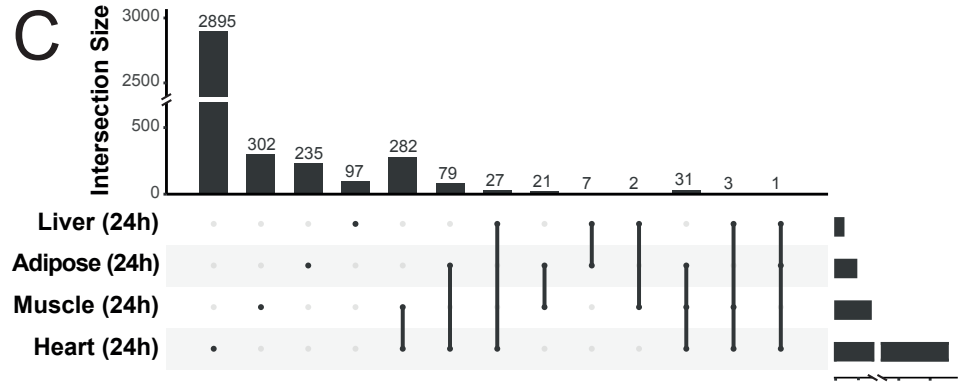

**D**

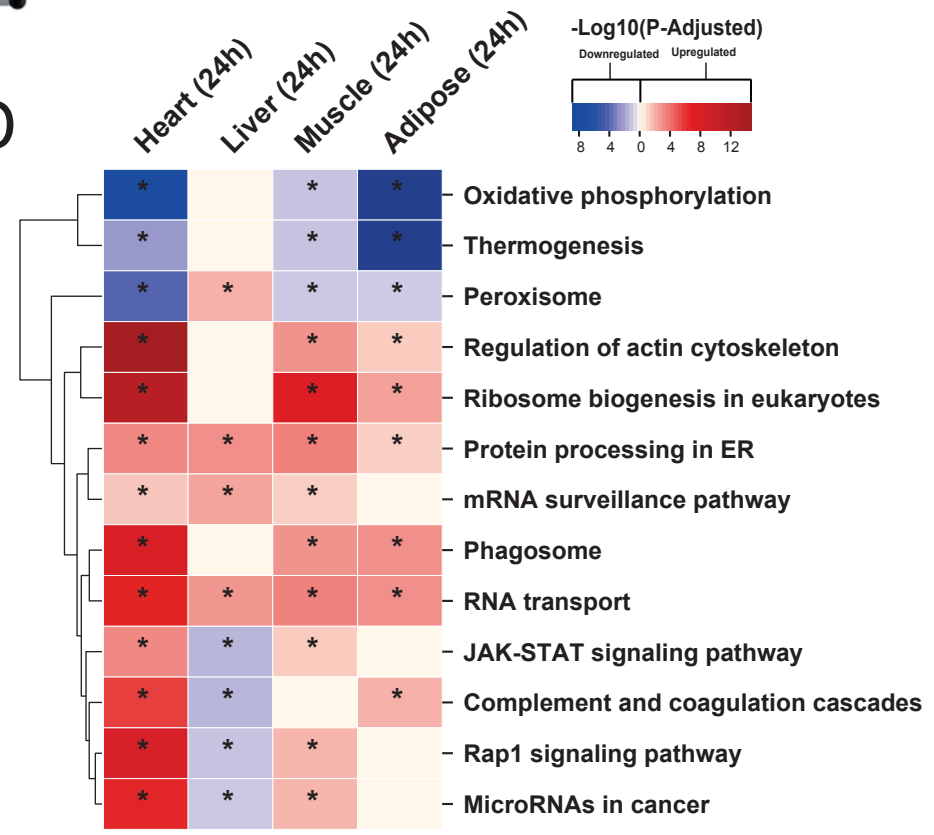

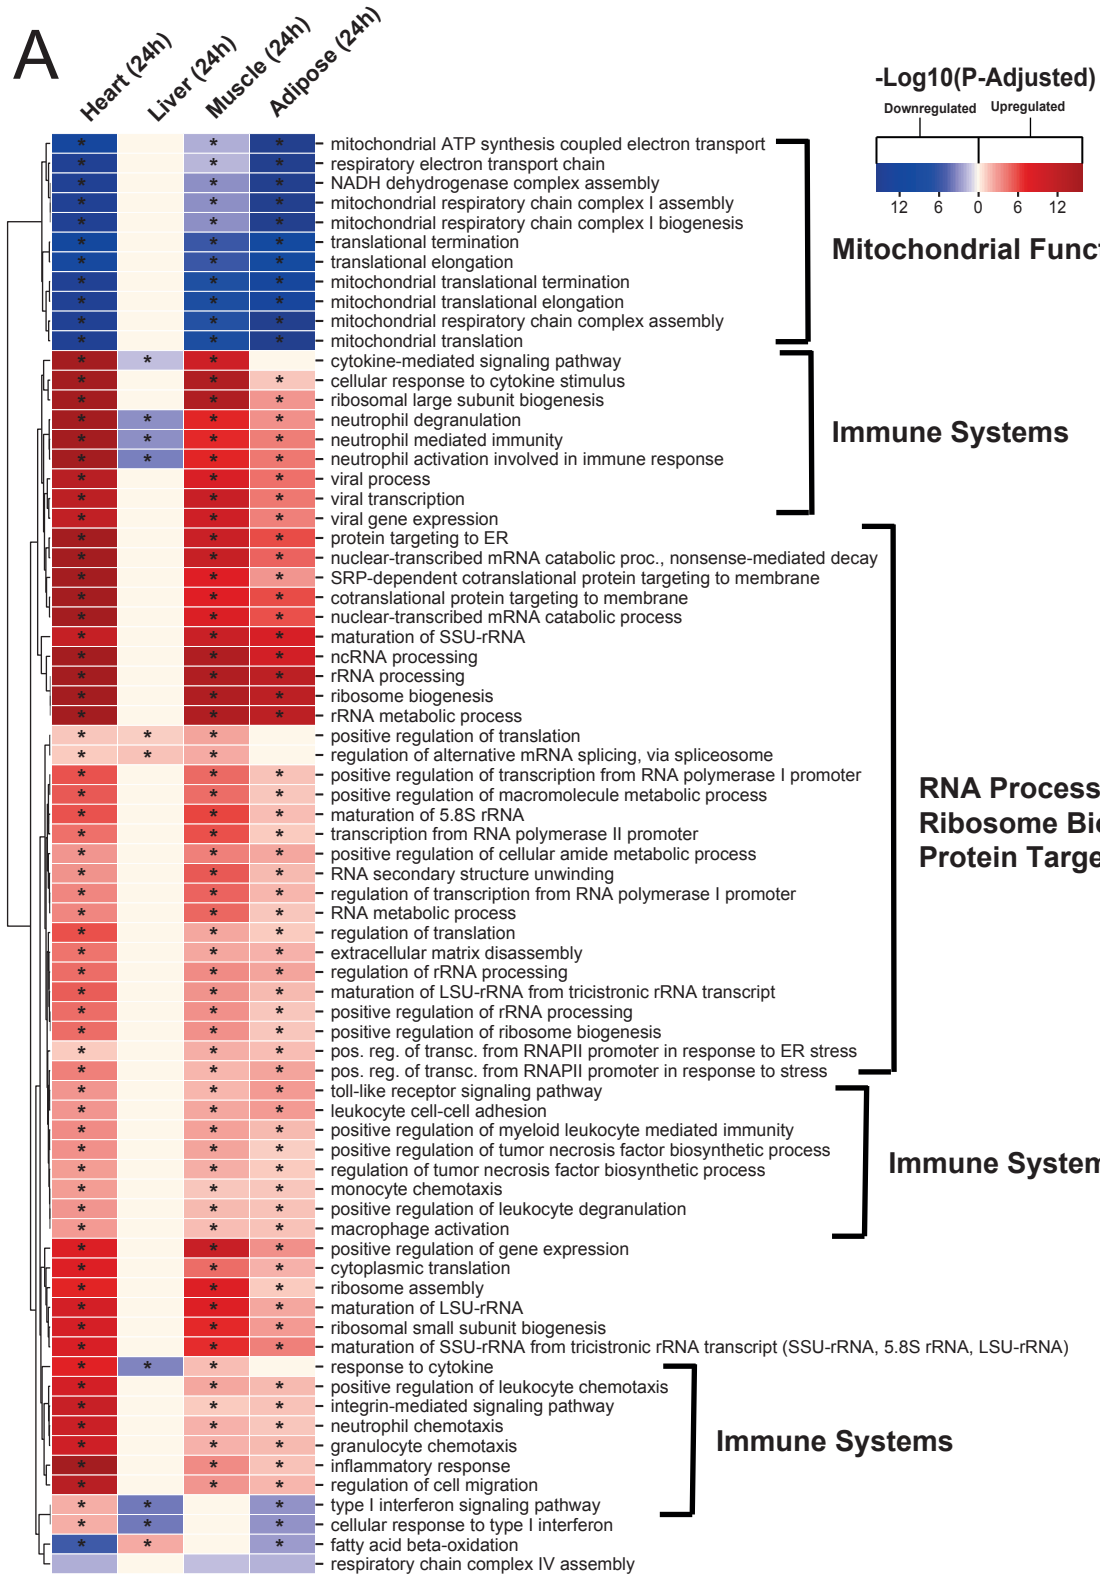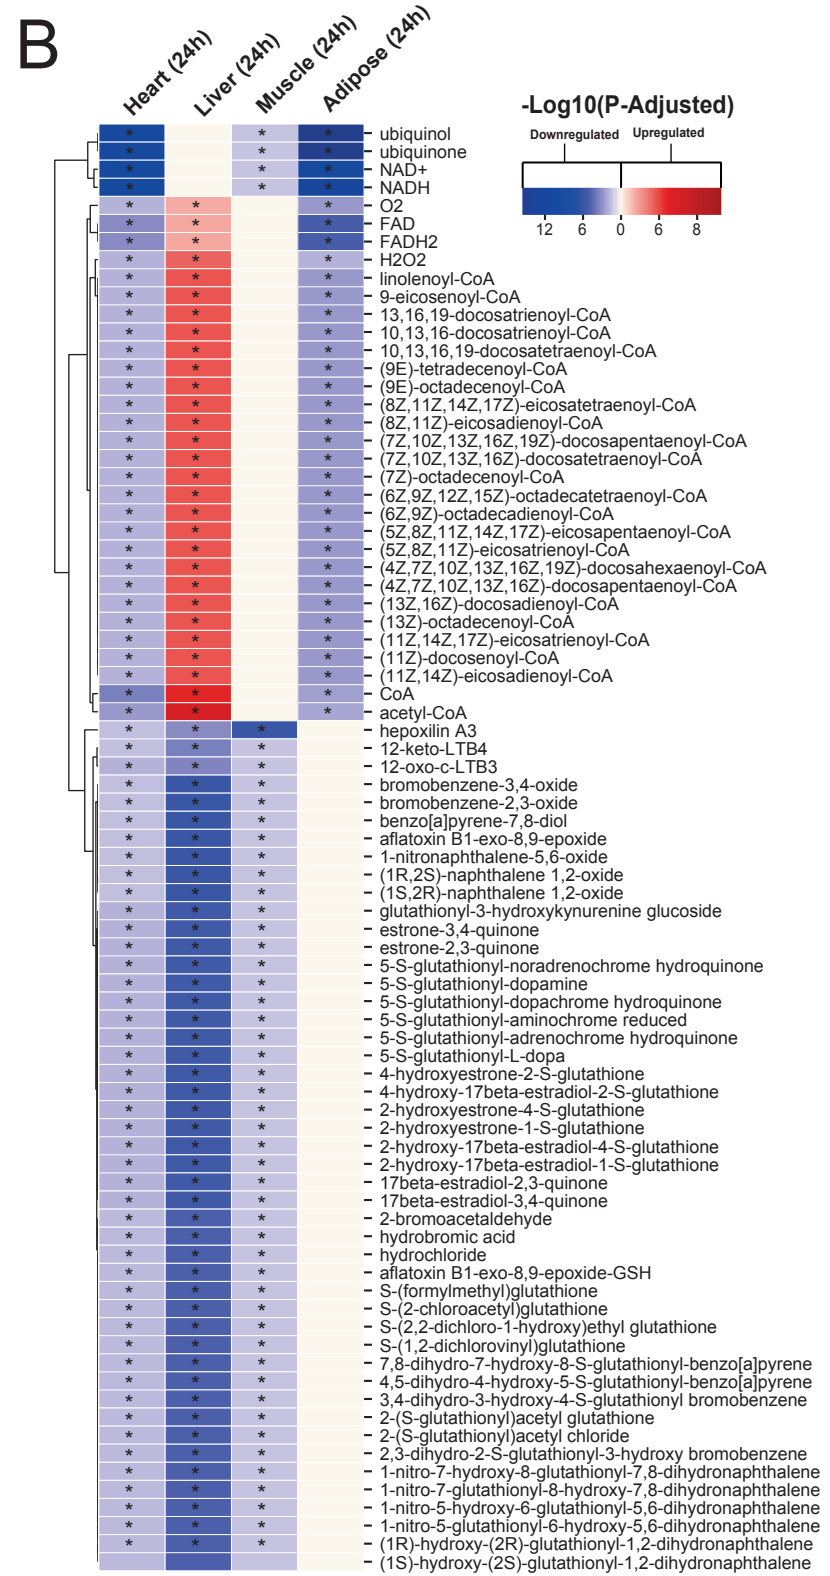



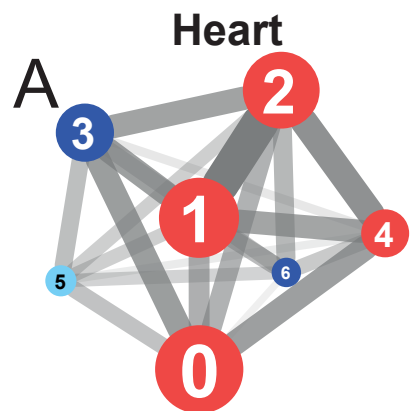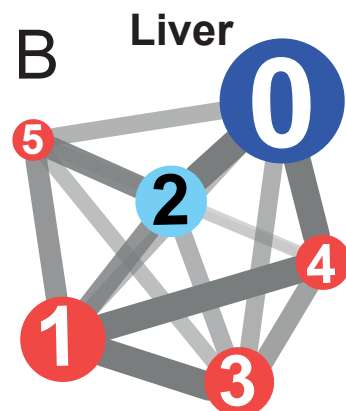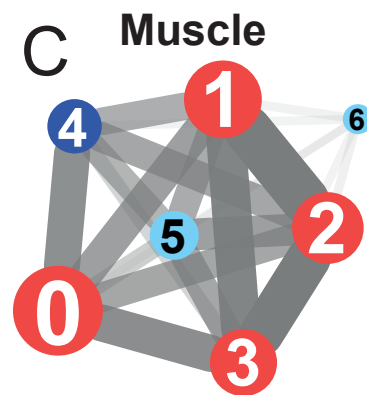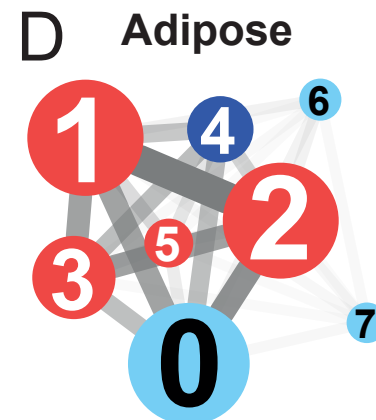

**E** Reg. of transcription from RNAP-II  
mRNA Processing

Regulation of Mitotic Cell Cycle Phase  
Ubiquitin-dependent Protein Catabolic Process

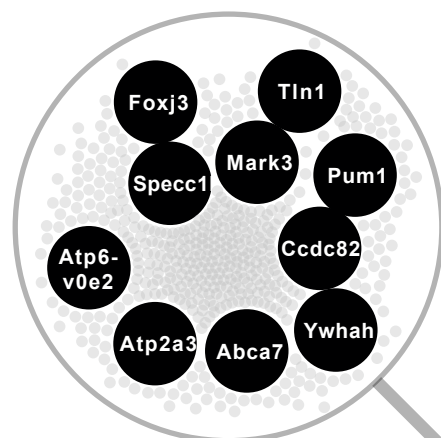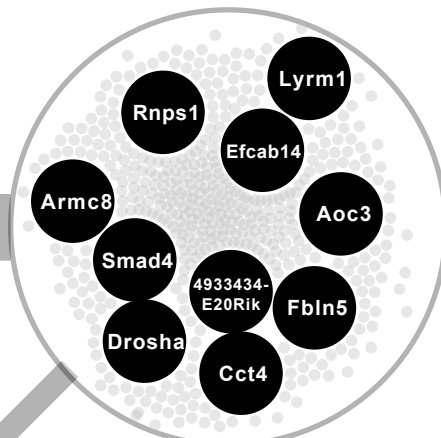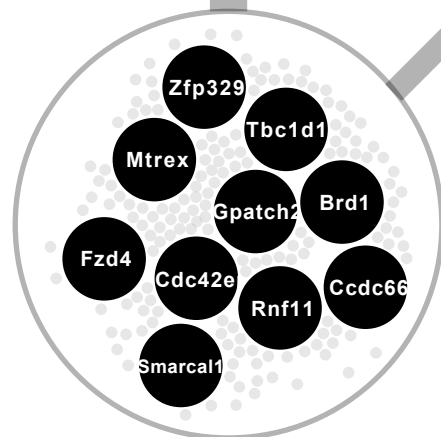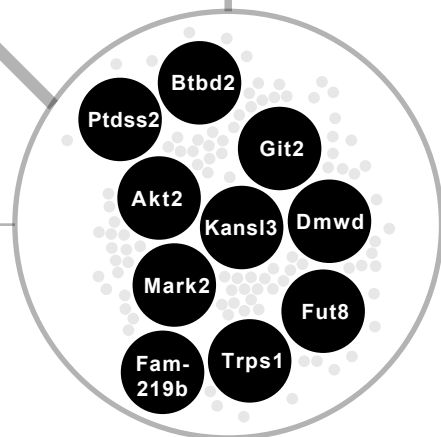

Amyloid Fibril formation  
Histone H3-K36 Demethylation

Nucleic Acid-templated Transcription  
Vesicle-mediated Transport

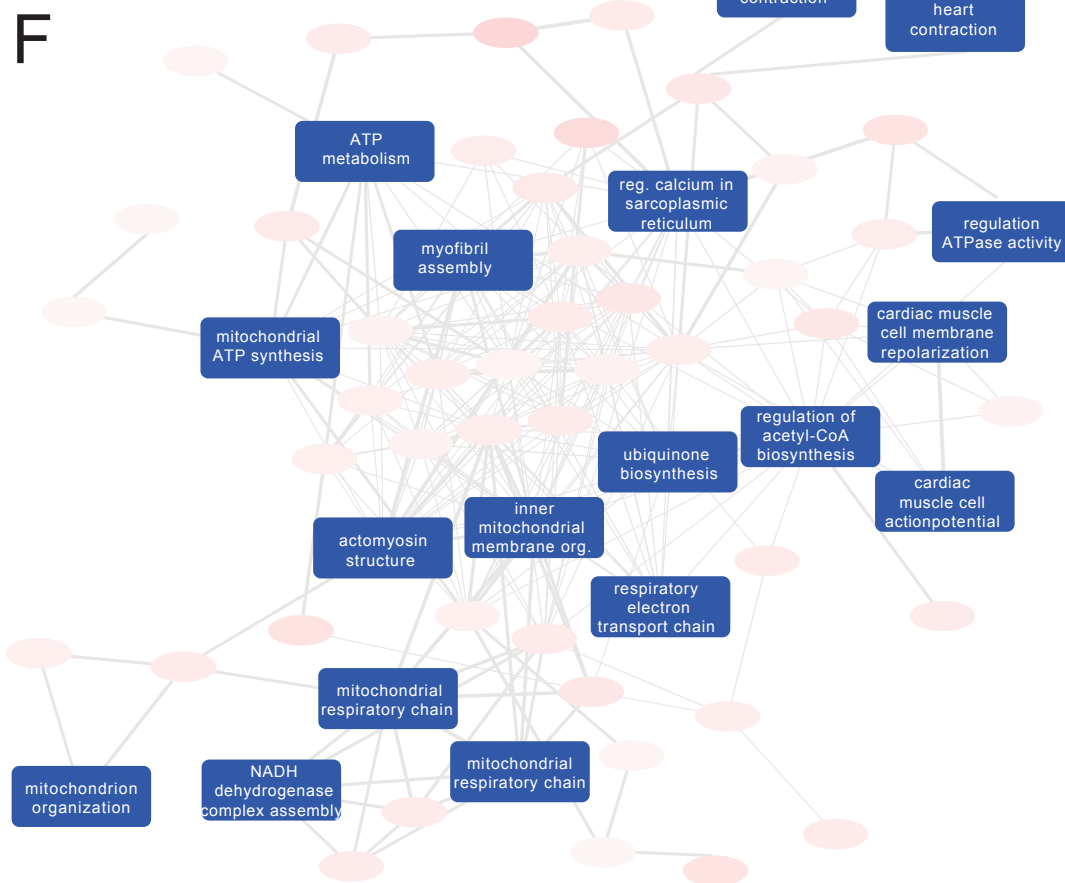

**A**

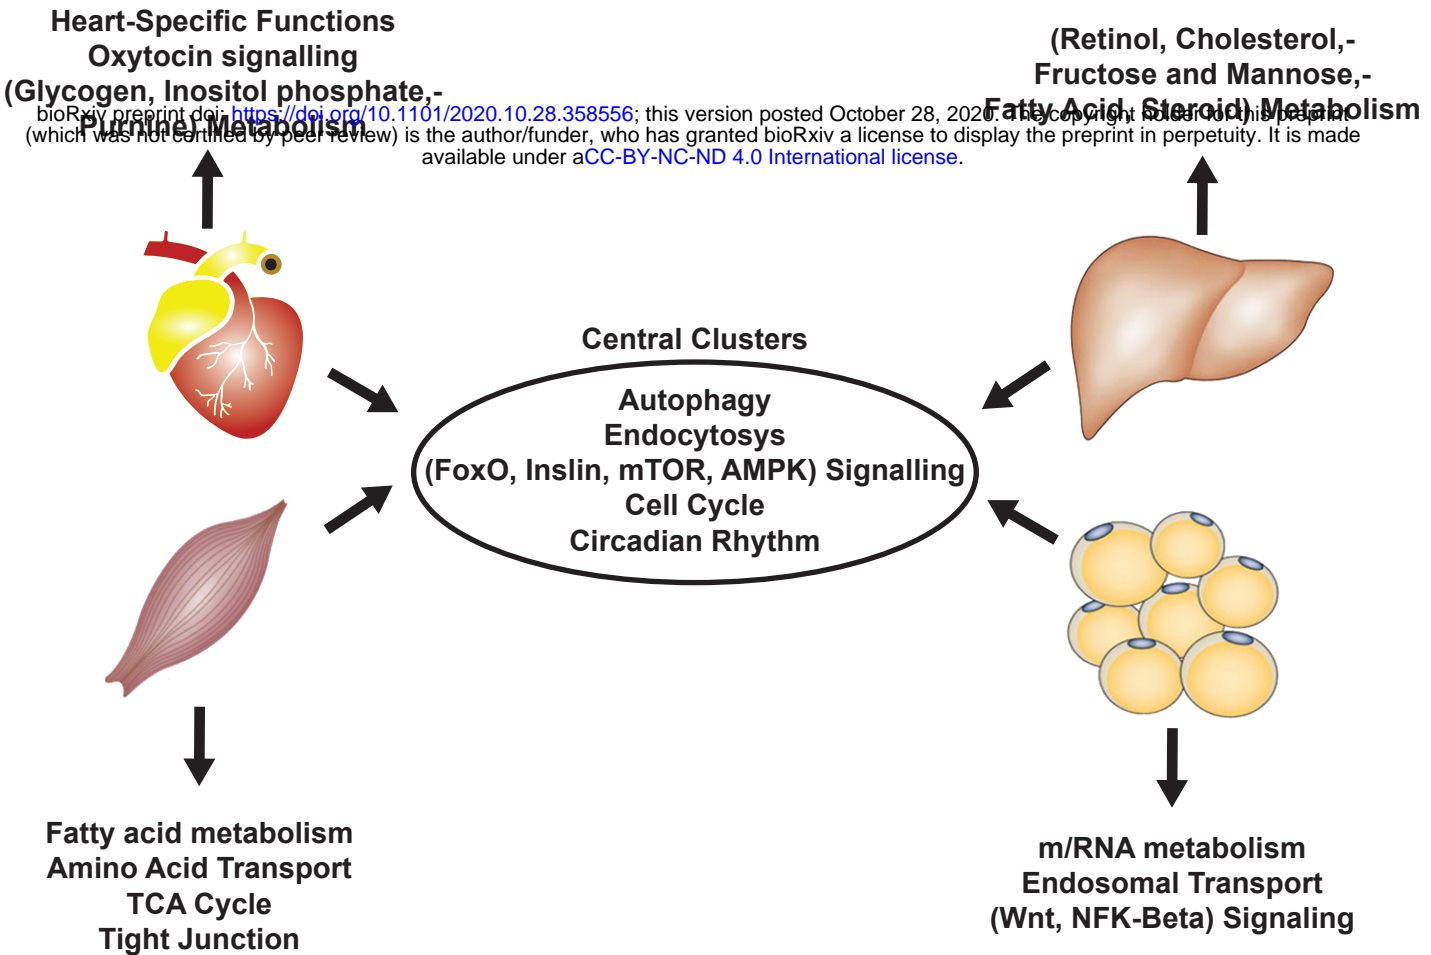

**B**

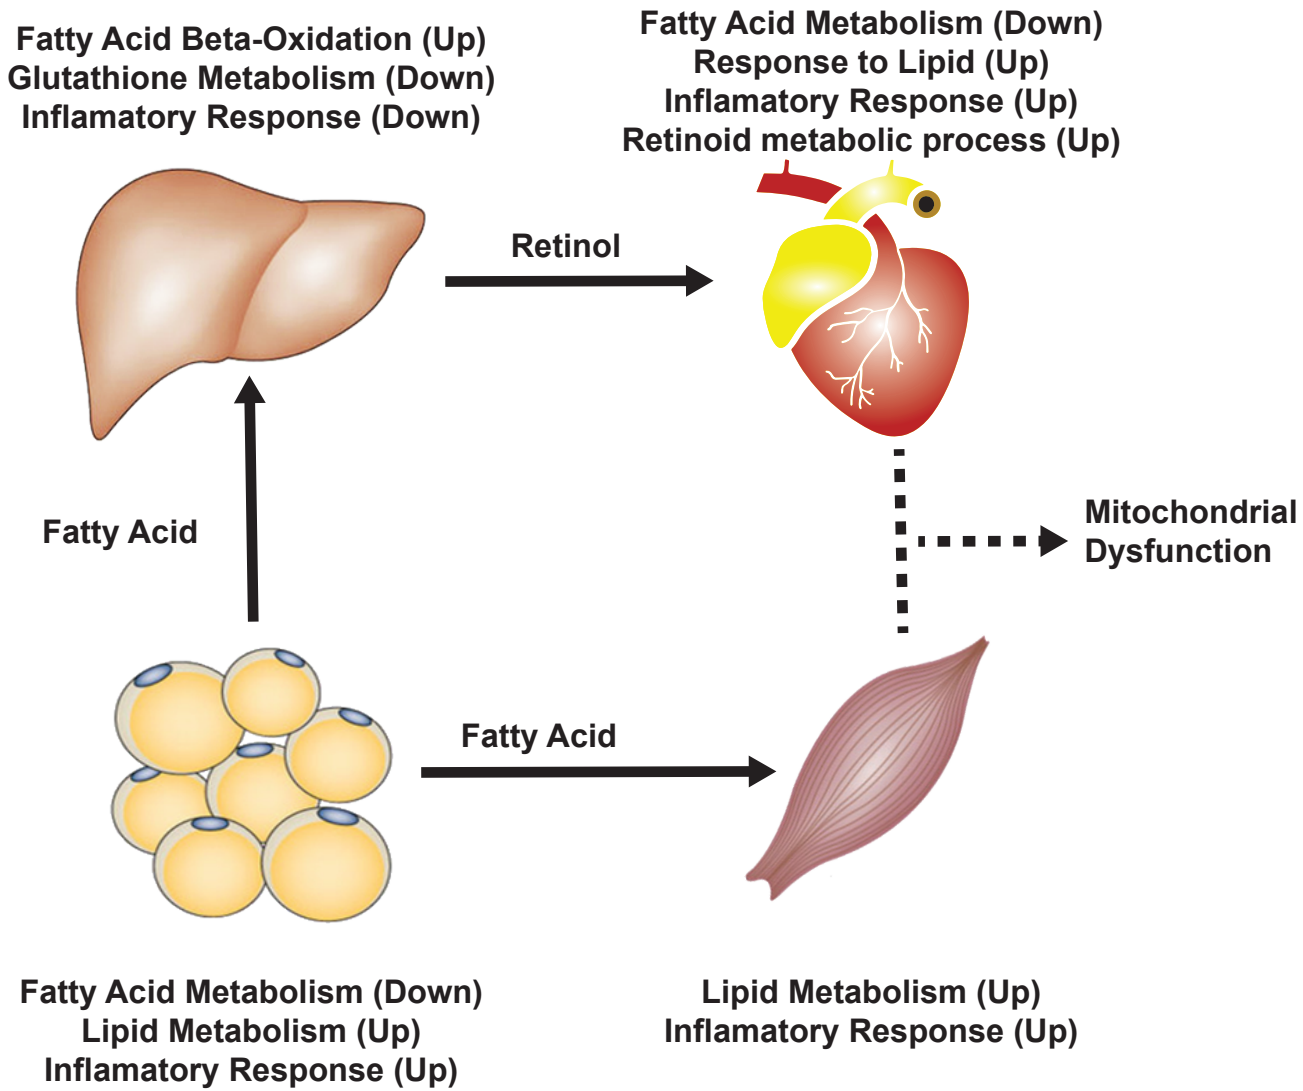

A

bioRxiv preprint doi: <https://doi.org/10.1101/2020.10.28.358556>; this version posted October 28, 2020. The copyright holder for this preprint (which was not certified by peer review) is the author/funder, who has granted bioRxiv a license to display the preprint in perpetuity. It is made available under aCC-BY-NC-ND 4.0 International license.

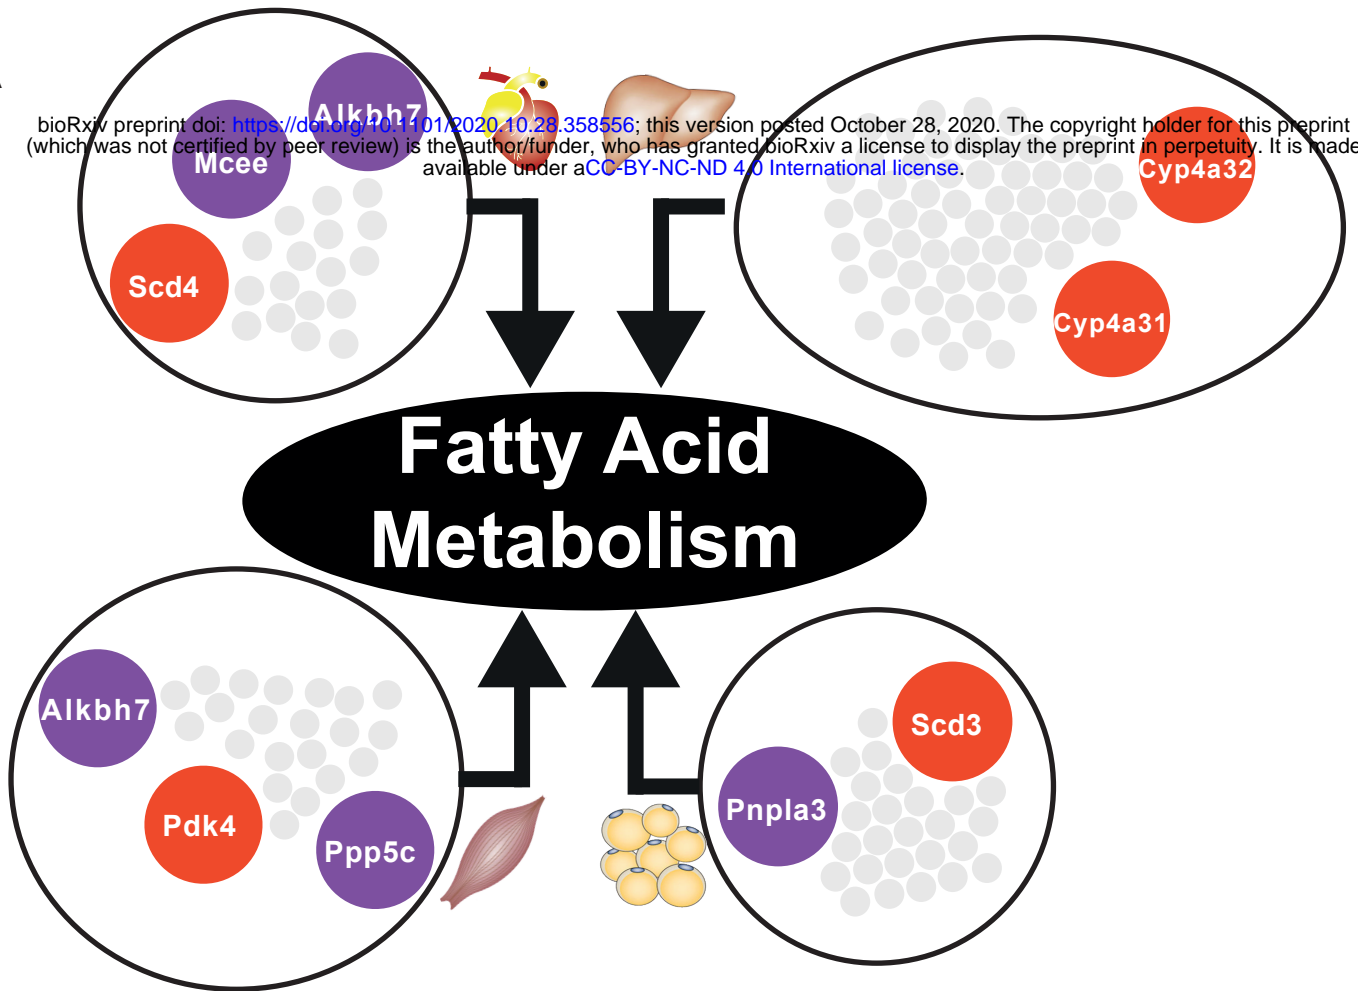

B

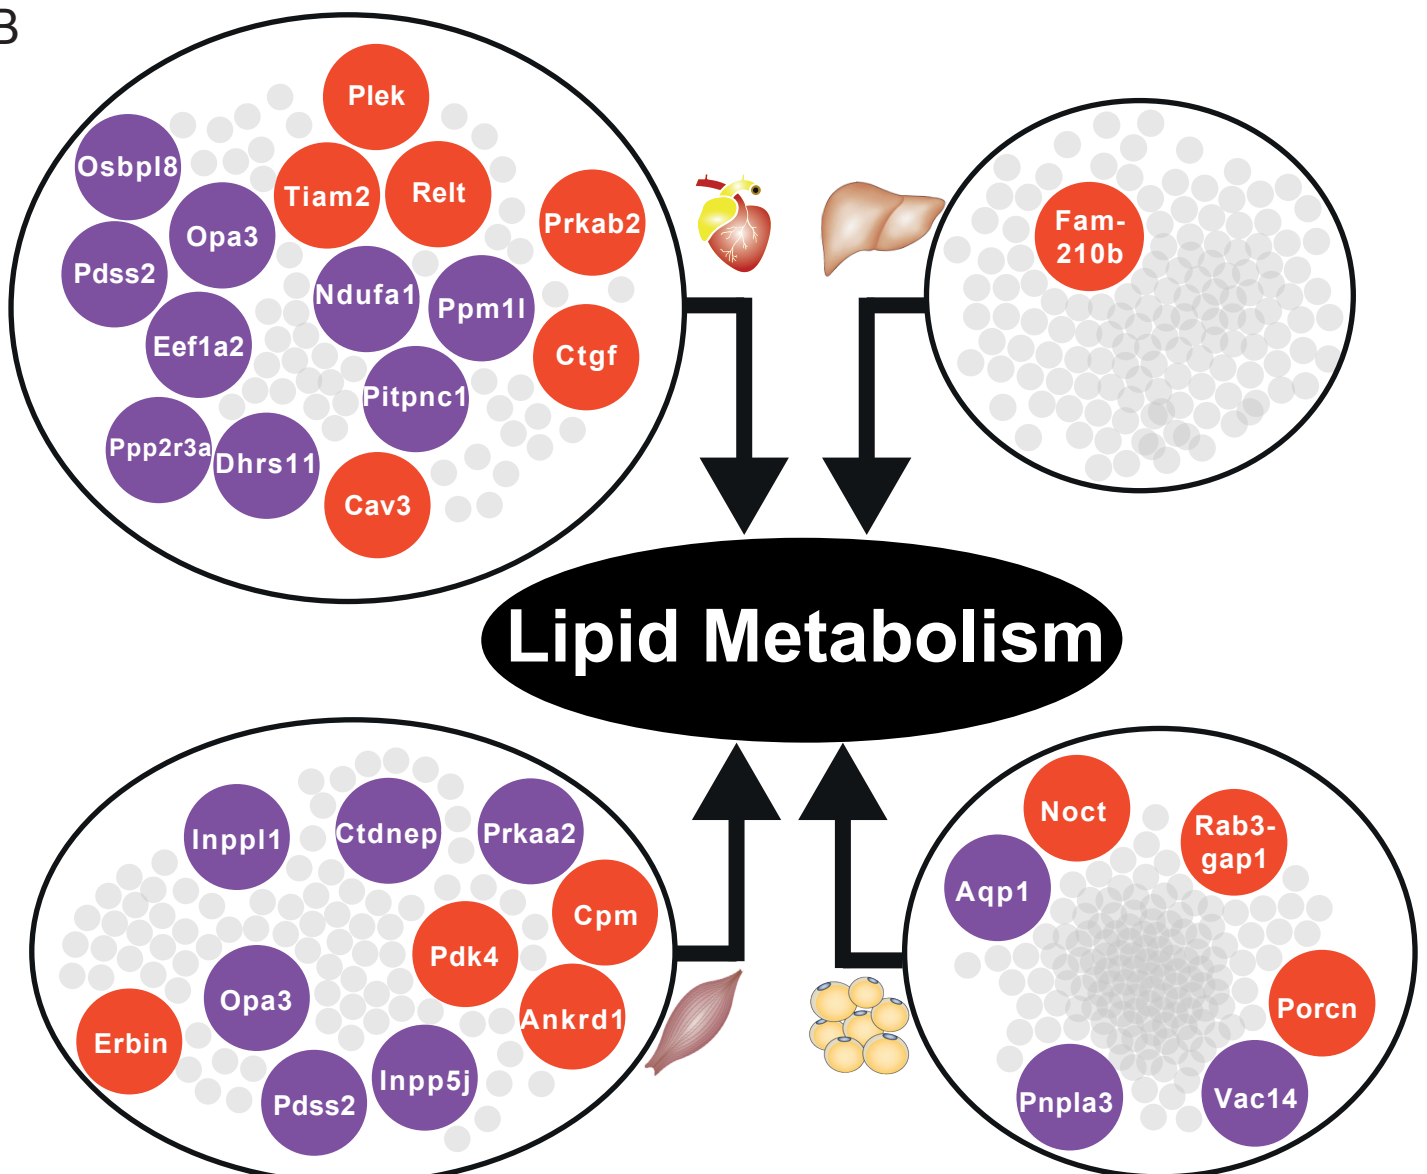

**A**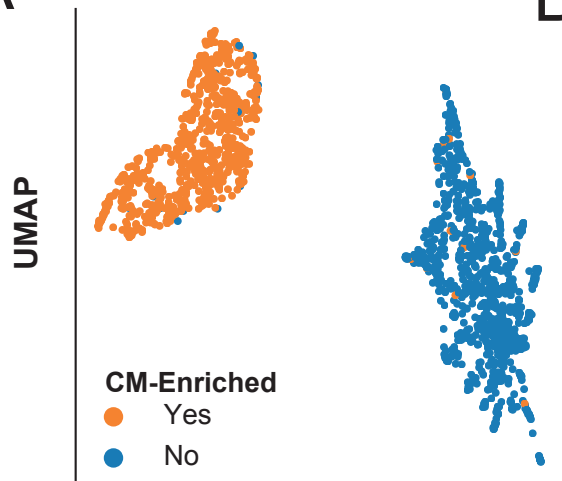**B**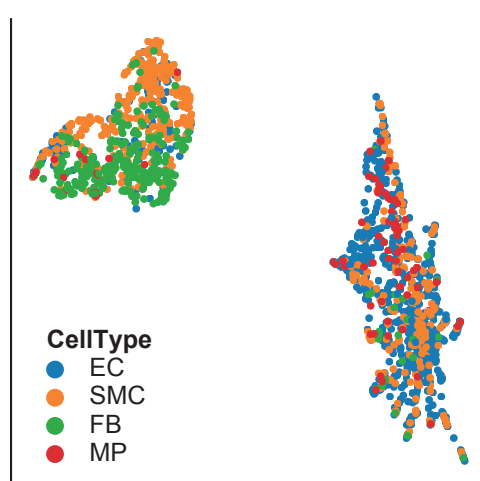**C**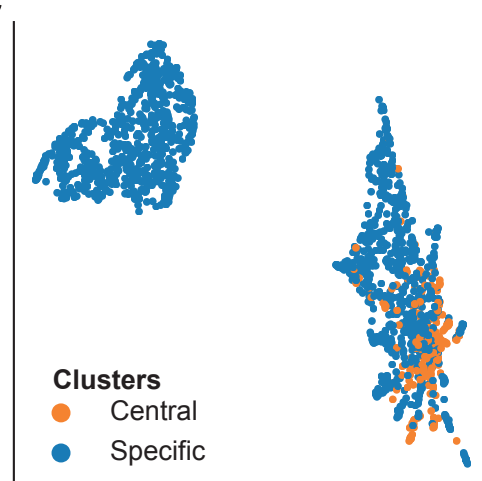**D**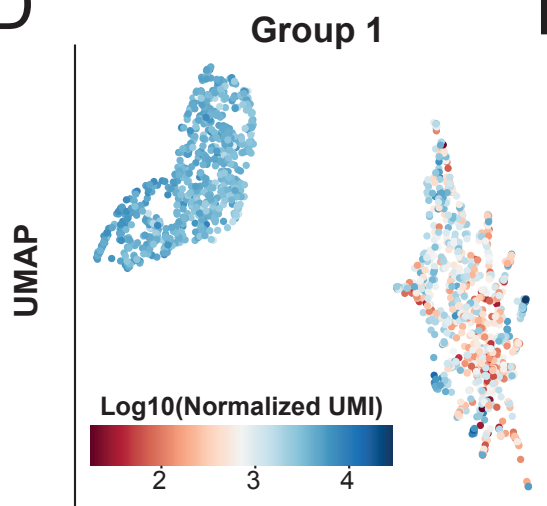**E**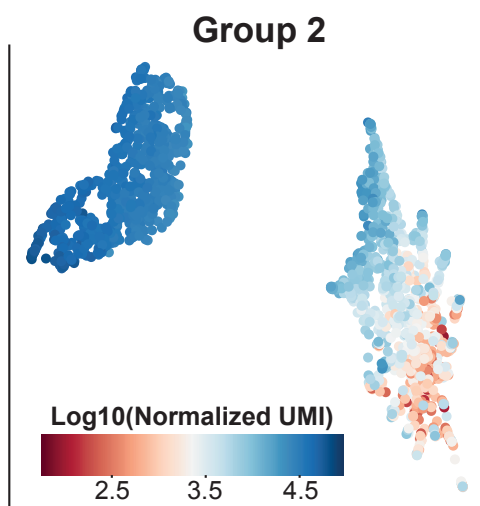**F**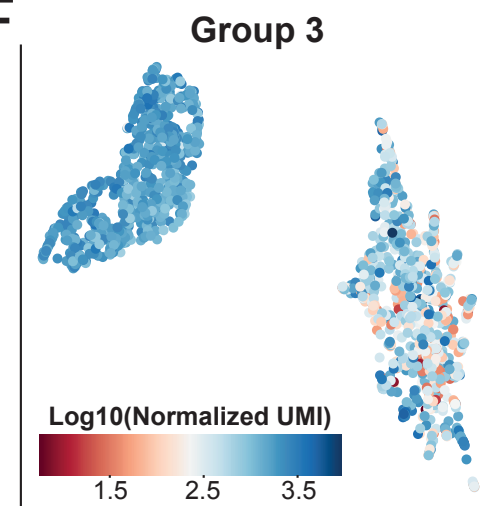**G**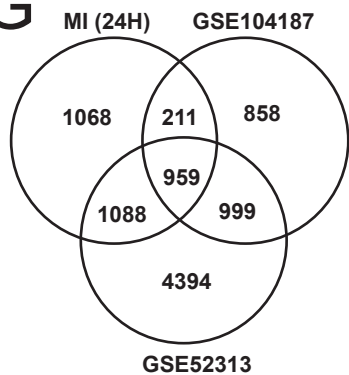**H**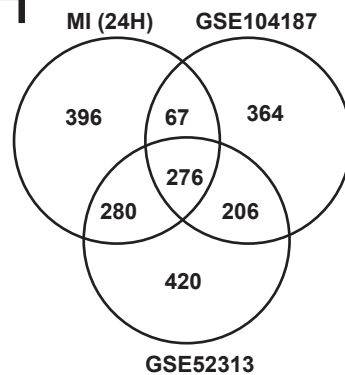**I**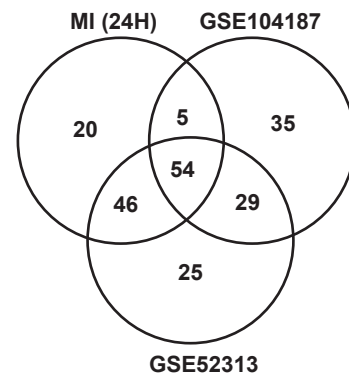

A

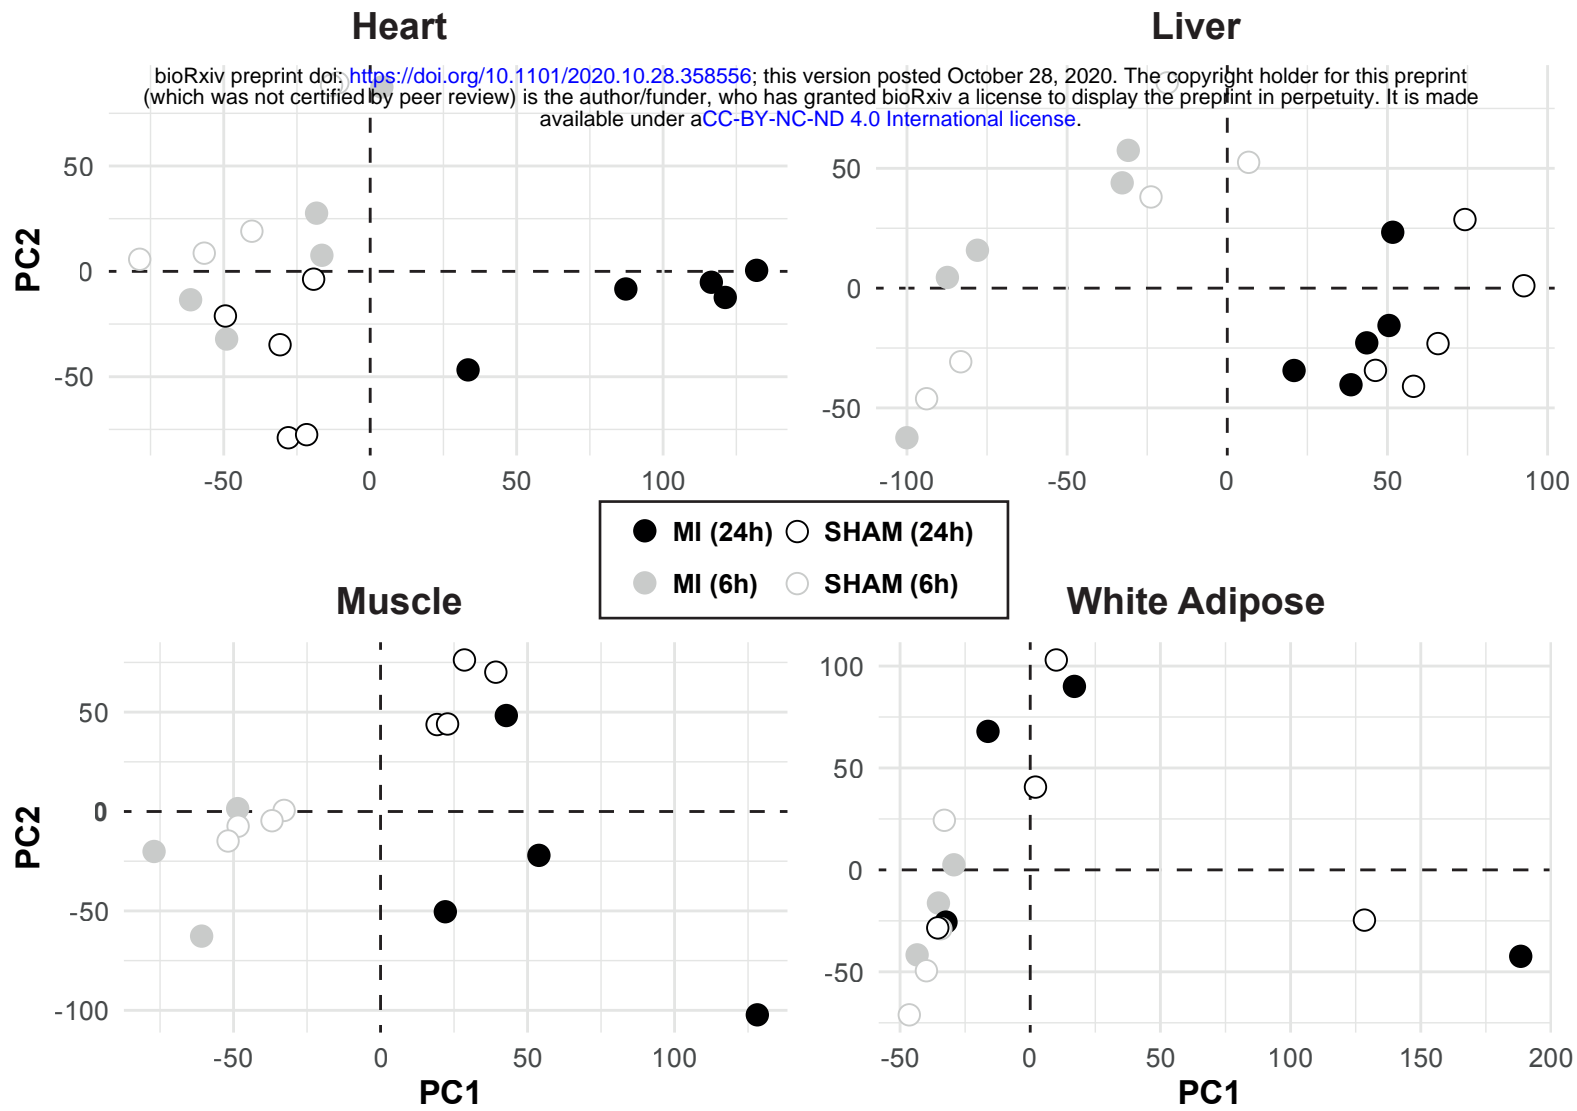

B

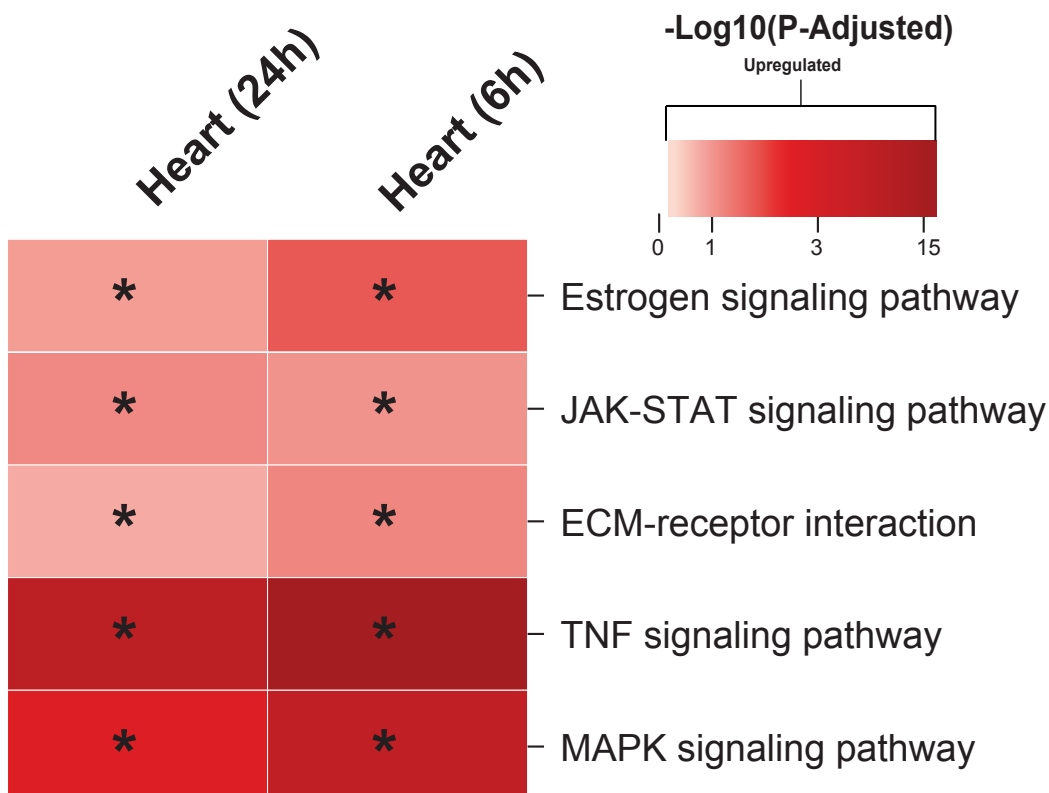

**Figure S1** (A) PCA plots of each tissue showing data from mice 6 and 24 h after an MI or sham operation. The plot showed that heart was affected the most by the change in conditions and the rest were most affected by time shifts. (B) KEGG pathways related to cardiac problems show activation after an MI.

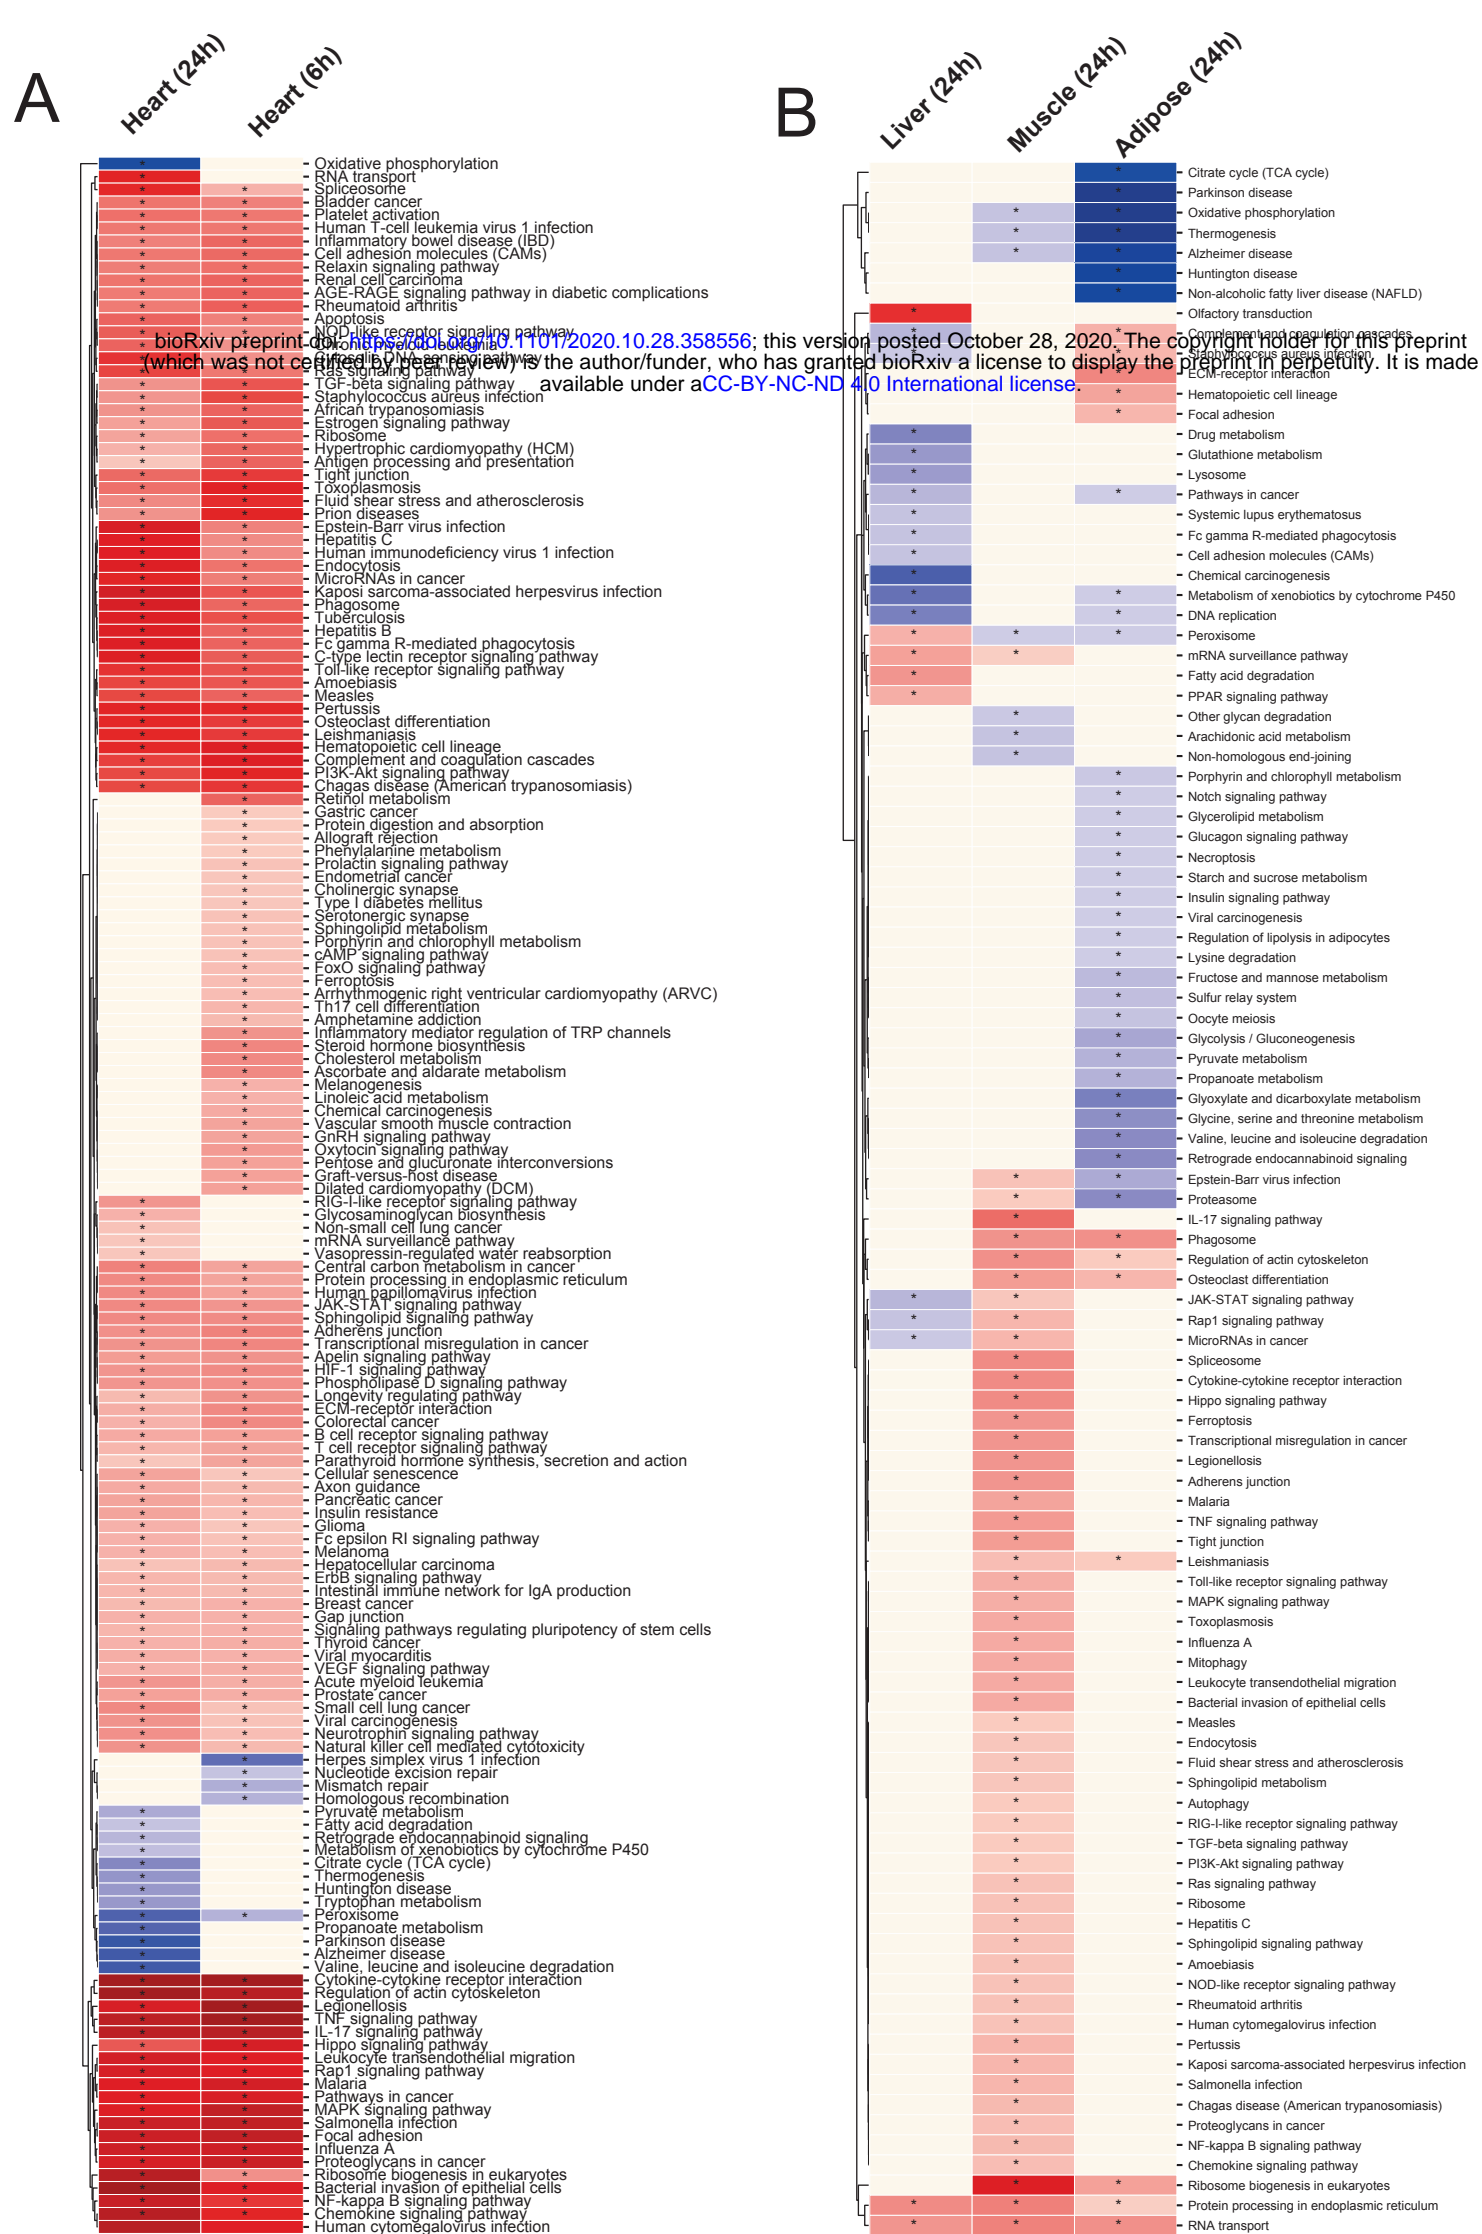

**Figure S2** KEGG pathway analysis results for each tissue (A) Heart 6- and 24- hours post MI (B) Liver, Muscle, and Adipose tissue 24 hours post MI.

A

cGMP-PKG SIGNALING PATHWAY

bioRxiv preprint doi: <https://doi.org/10.1101/2020.10.28.358556>; this version posted October 28, 2020. The copyright holder for this preprint (which was not certified by peer review) is the author/funder, who has granted bioRxiv a license to display the preprint in perpetuity. It is made available under aCC-BY-NC-ND 4.0 International license.

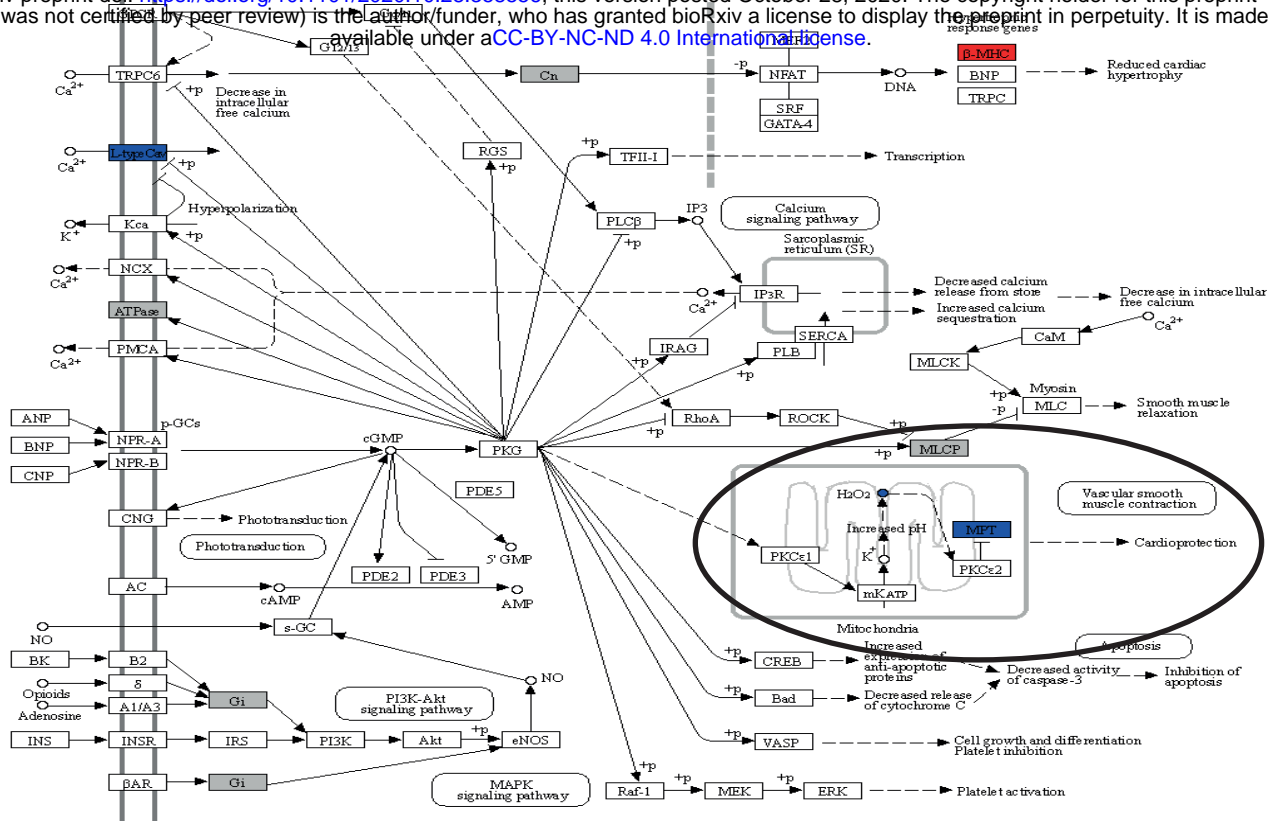

04022 6/4/19  
(c) Kanehisa Laboratories

B

HIF-1 SIGNALING PATHWAY

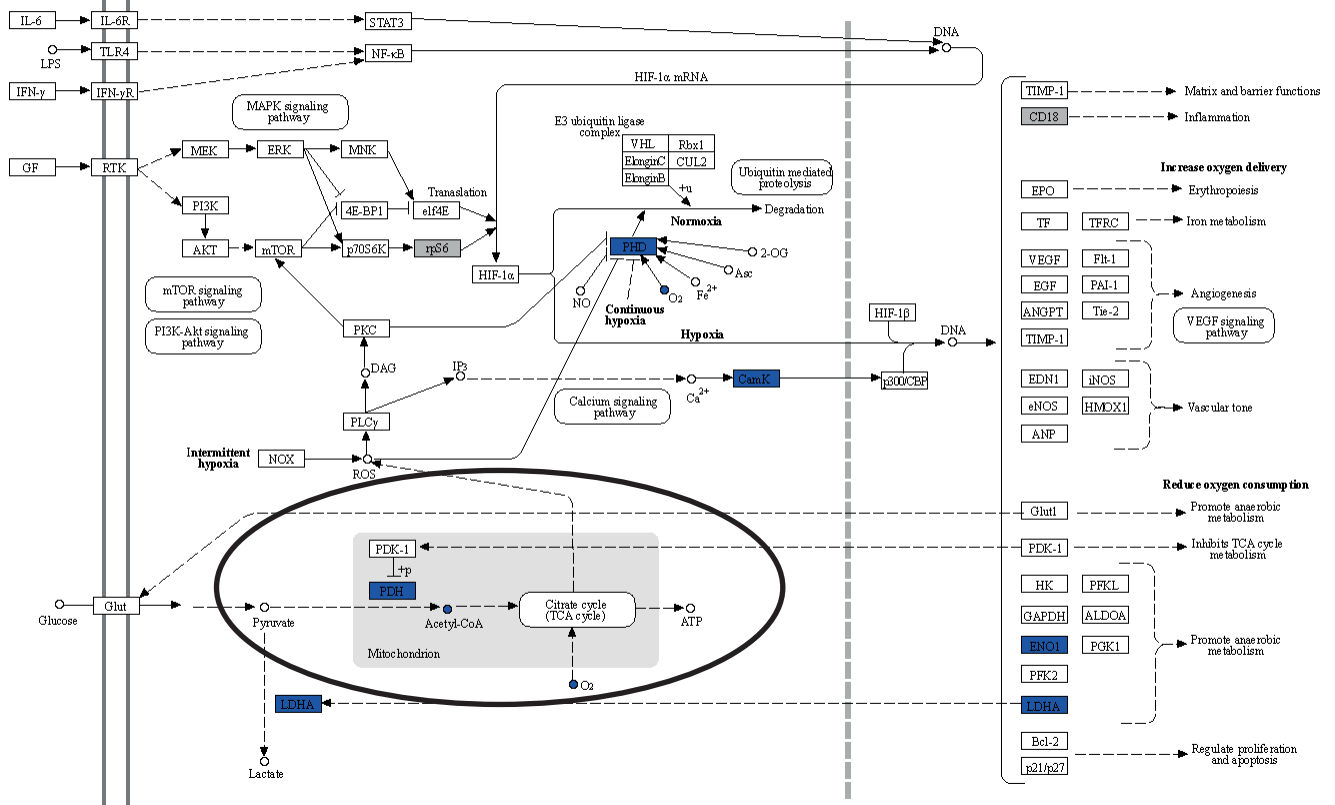

04066 7/5/19  
(c) Kanehisa Laboratories

Figure S3 (A) cGMP-PKG & (B) HIF-1 signaling pathway with overlay data from differential expression and reporter metabolites analysis.

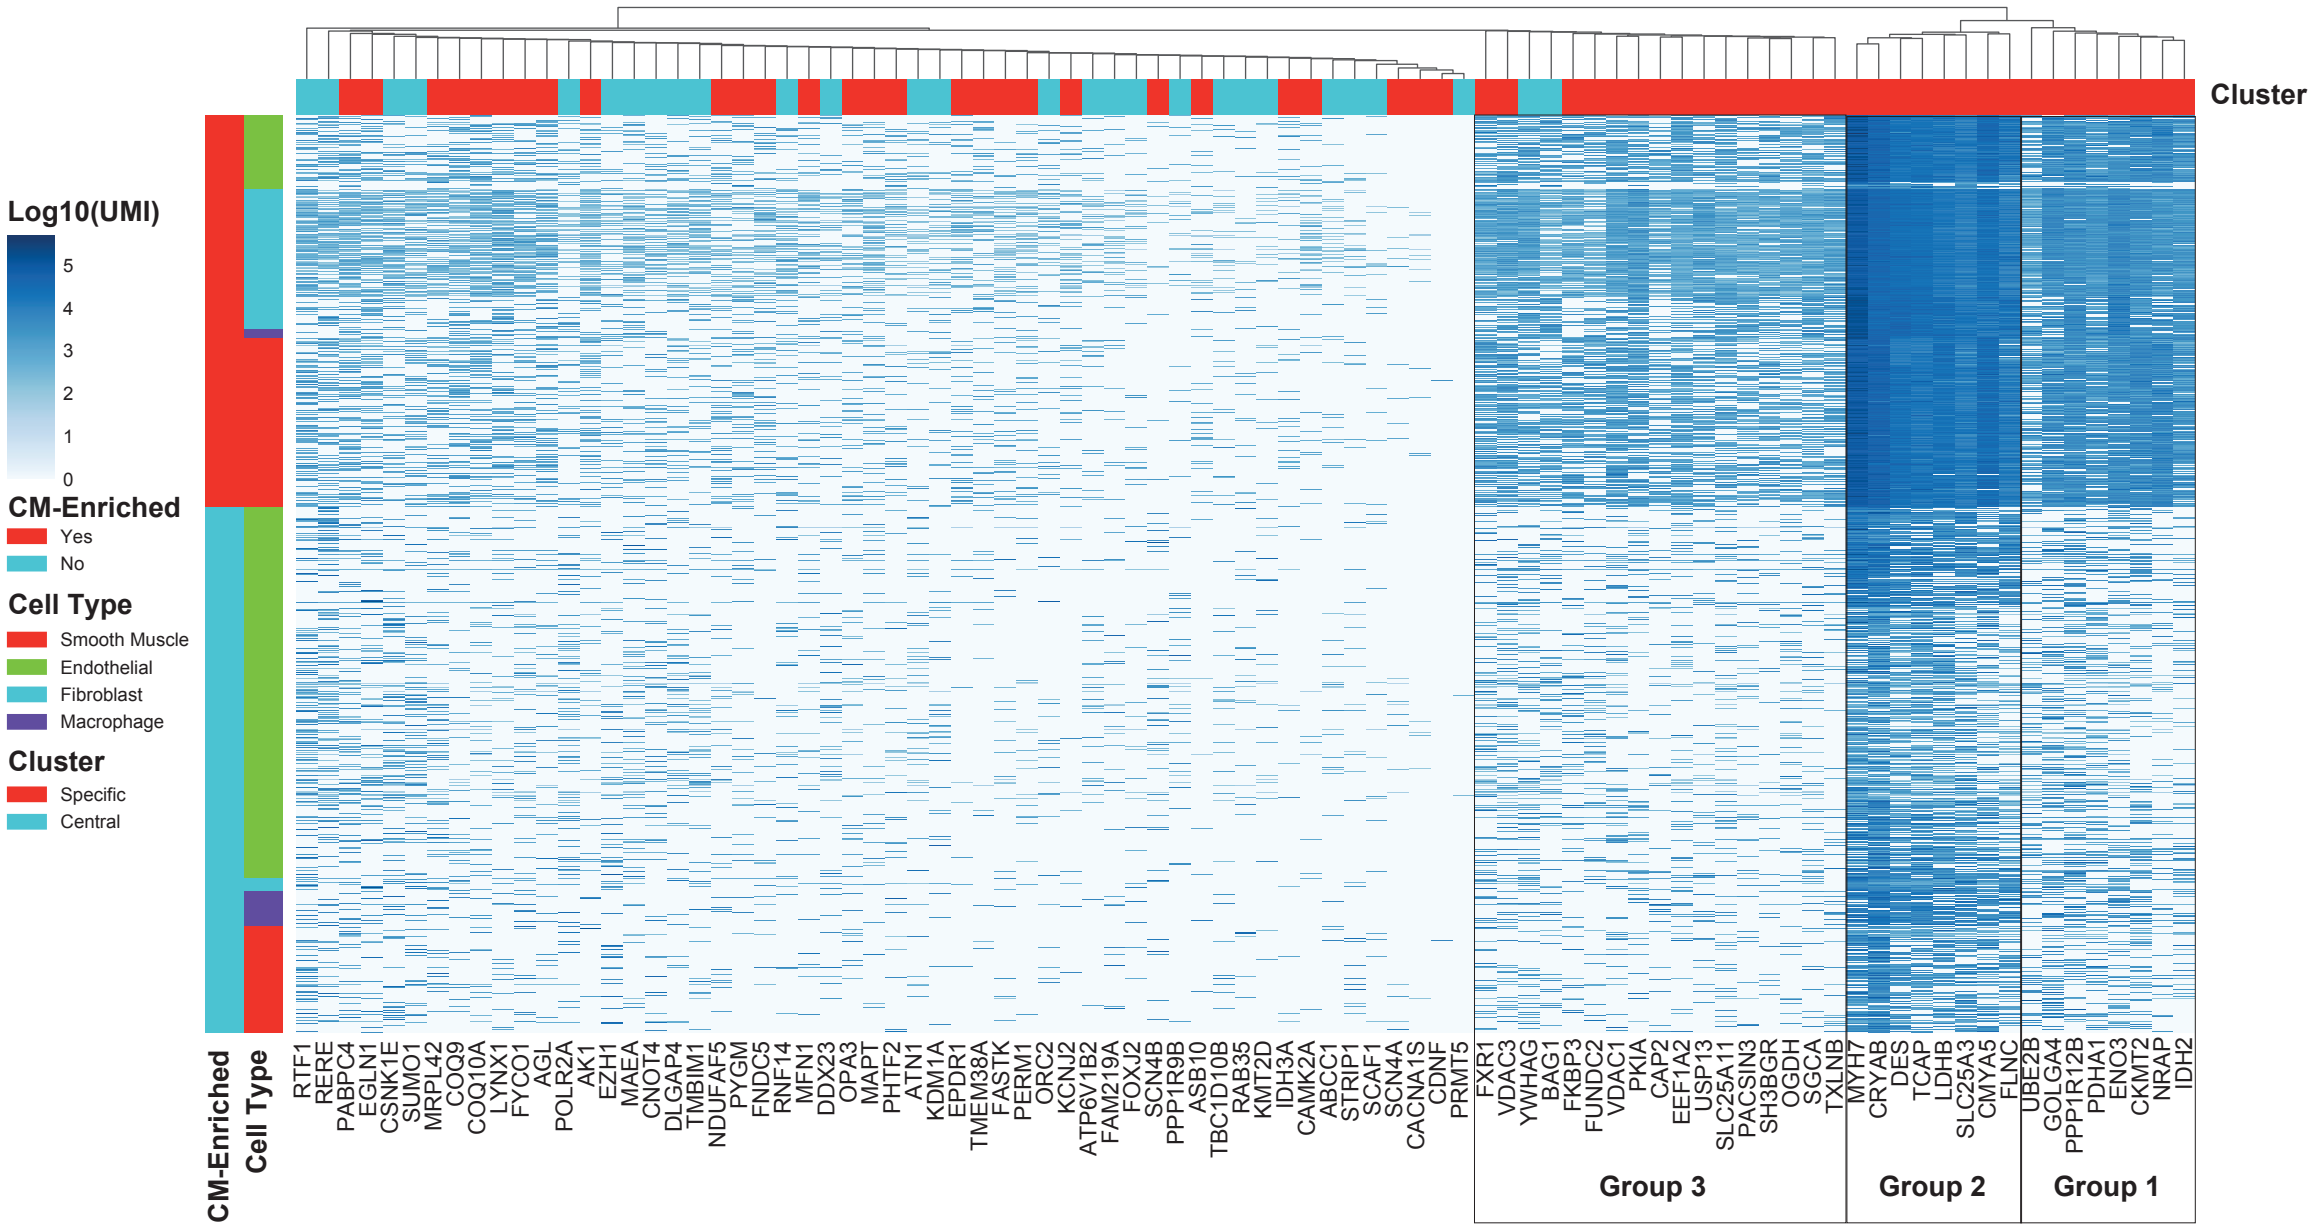

**Figure S4** Expression level of central genes from most central and tissue-specific clusters and their hierarchical clustering on the single cell level. activation after an MI.



UMAP

FLNC

LGALS3

PRKACA

PPRC1

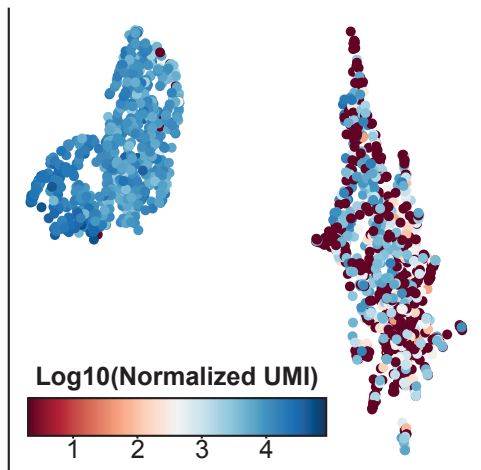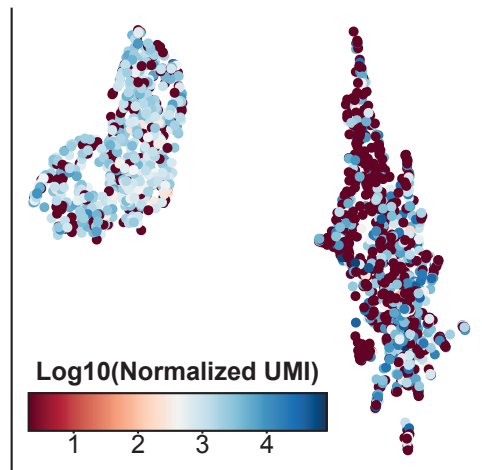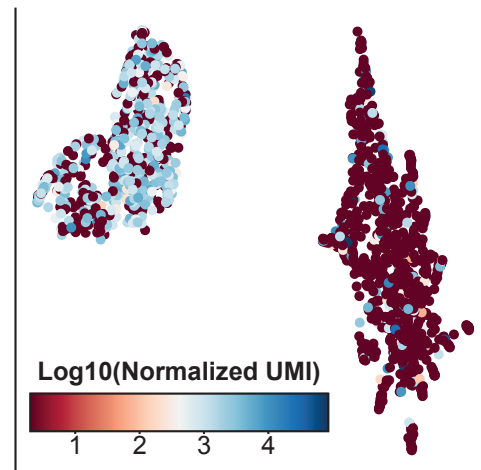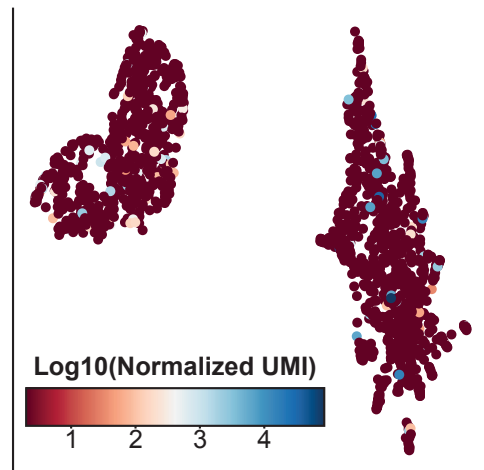

Figure S5 scRNA Expression of Flnc, Lgals3, and Prkaca.
