1                   **Integrative transcriptomic analysis of tissue-specific metabolic crosstalk after**  
2                                           **myocardial infarction**

3           Muhammad Arif<sup>1, #</sup>, Martina Klevstig<sup>2, #</sup>, Rui Benfeitas<sup>3</sup>, Stephen Doran<sup>4</sup>, Hasan Turkez<sup>5</sup>,  
4           Mathias Uhlén<sup>1</sup>, Maryam Clausen<sup>6</sup>, Johannes Wikström<sup>7</sup>, Damla Etal<sup>6</sup>, Cheng Zhang<sup>1</sup>, Malin  
5                                           Levin<sup>2</sup>, Adil Mardinoglu<sup>1, 4, \*</sup>, Jan Boren<sup>2, \*</sup>

6           <sup>1</sup>Science for Life Laboratory, KTH - Royal Institute of Technology, Stockholm, SE-17121,  
7           Sweden.

8  
9           <sup>2</sup>Department of Molecular and Clinical Medicine, University of Gothenburg, The Wallenberg  
10           Laboratory, Sahlgrenska University Hospital, Gothenburg, Sweden.

11  
12           <sup>3</sup>National Bioinformatics Infrastructure Sweden (NBIS), Science for Life Laboratory,  
13           Department of Biochemistry and Biophysics, Stockholm University, S-10691 Stockholm,  
14           Sweden

15  
16           <sup>4</sup>Centre for Host-Microbiome Interactions, Faculty of Dentistry, Oral & Craniofacial  
17           Sciences, King's College London, London, SE1 9RT, United Kingdom.

18  
19           <sup>5</sup>Department of Medical Biology, Faculty of Medicine, Atatürk University, Erzurum, 25240,  
20           Turkey.

21  
22           <sup>6</sup>Translational Genomics, BioPharmaceuticals R&D, Discovery Sciences, AstraZeneca,  
23           Gothenburg, Sweden.

24  
25           <sup>7</sup>Bioscience Cardiovascular, Research and Early Development, Cardiovascular, Renal and  
26           Metabolism (CVRM), BioPharmaceuticals R&D, AstraZeneca, Gothenburg, Sweden

27  
28           <sup>#</sup>Contributed equally.

29           <sup>\*</sup>Corresponding authors: Adil Mardinoglu and Jan Boren

30           Email: [adilm@scilifelab.se](mailto:adilm@scilifelab.se); [Jan.Boren@wlab.gu.se](mailto:Jan.Boren@wlab.gu.se)

31  
32

33 **Abstract/Summary**

34 Myocardial infarction (MI) promotes a range of systemic effects, many of which are  
35 unknown. Here, we investigated the alterations associated with MI progression in heart and  
36 other metabolically active tissues (liver, skeletal muscle, and adipose) in a mouse model of  
37 MI (induced by ligating the left ascending coronary artery) and sham-operated mice. We  
38 performed a genome-wide transcriptomic analysis on tissue samples obtained 6- and 24-hours  
39 post MI or sham operation. By generating tissue-specific biological networks, we observed:  
40 (1) dysregulation in multiple biological processes (including immune system, mitochondrial  
41 dysfunction, fatty-acid beta-oxidation, and RNA and protein processing) across multiple  
42 tissues post MI; and (2) tissue-specific dysregulation in biological processes in liver and heart  
43 post MI. Finally, we validated our findings in two independent MI cohorts. Overall, our  
44 integrative analysis highlighted both common and specific biological responses to MI across a  
45 range of metabolically active tissues.

46

47 **Keywords**

48 Systems biology; network analysis; whole-body modelling; cardiovascular disease;  
49 Myocardial infarction; multi-tissue; metabolically active tissues; liver; adipose; muscle

50

## 51 **Introduction**

52 Cardiovascular disease (CVD) is the leading cause of death worldwide, accounting for more  
53 than 17 million deaths globally in 2016 <sup>1</sup>. Myocardial infarction (MI) is one of the most  
54 common causes of CVD-related death, and is the result of severe coronary artery disease that  
55 develops from tapered arteries or chronic blockage of the arteries caused by accumulation of  
56 cholesterol or plaque (atherosclerosis). Many behavioral risk factors (including unhealthy  
57 diet, physical inactivity, excessive use of alcohol, and tobacco consumption), which are  
58 responsible for hypertension, obesity, diabetes, and hyperlipidemia by significantly altering  
59 metabolism, are also implicated in MI. These abnormalities are known as the high-risk factors  
60 of MI and CVDs in general.

61

62 Systems biology has been used in many studies to reveal the underlying molecular  
63 mechanisms of complex human diseases and to answer important biological questions related  
64 to the progression, diagnosis and treatment of the diseases. The use of systems biology has  
65 aided the discovery of new therapeutic approaches in multiple diseases <sup>1-3</sup> by identifying  
66 novel therapeutic agents and repositioning of existing drugs <sup>4</sup>. Systems biology has also been  
67 employed in the identification of novel biomarkers, characterization of patients and  
68 stratification of heterogenous cancer patients <sup>5-7</sup>. Specifically, integrated networks (INs) <sup>7</sup> and  
69 co-expression networks (CNs) <sup>8</sup> have been proven to be robust methods for revealing the key  
70 driver of metabolic abnormalities, discovering new therapy strategies, as well as gaining  
71 systematic understanding of diseases <sup>9,10</sup>.

72

73 Previously, multiple studies in individual tissues have been performed and provided new  
74 insights into the underlying mechanisms of diseases <sup>11-14</sup>. However, the crosstalk between  
75 different tissues and their dysregulation has not been examined in MI and other CVD-related  
76 complications <sup>15</sup>. Here we performed an integrated analysis of heart and other metabolically  
77 active tissues (liver, skeletal muscle and adipose tissue) using a mouse model of MI. We used  
78 several systems biology approaches to obtain a systematic picture of the metabolic alterations  
79 that occur after an MI (**Figure 1A**), and validated our findings in two independent datasets.

## 80 **Results**

### 81 *Differential expression analysis shows a pronounced effect on gene expression 24 h post*

#### 82 **MI**

83 To study global biological alterations and systemic whole-body effects associated with MI,  
84 we obtained heart, liver, skeletal muscle, and white adipose tissue from mice 6 h and 24 h  
85 after either an MI (induced by ligating the left ascending coronary artery) or a sham operation  
86 (as control). Total of 20 mice were used in this study (5 mice in each time and condition  
87 combination) (**Figure 1A**). We generated transcriptomics data and identified differentially  
88 expressed genes (DEGs) 6 and 24 h post MI and sham operation in all tissues, with the most  
89 significant differences occurring after 24 h (**Supplementary File 1, Figure 1B**). Principal  
90 component analysis (PCA) showed a close clustering between the control (for both time  
91 points) and MI (6 h and 24 h separately) samples for heart tissue but clustering by extraction  
92 time points (6 h and 24 h clusters) for the other tissues (**Figure 1 - Figure Supplement 1**).  
93 We present the transcriptional changes associated with MI in **Supplementary File 1** and the  
94 DEGs (FDR < 5%) using an UpSet plot<sup>16</sup> in **Figure 1C**.

95

96 All tissues showed a more pronounced effect in terms of the number of DEGs 24 h post MI  
97 (**Figure 1C**). As expected, the most affected tissue was the heart (393 DEGs at 6 h, 3318  
98 DEGs at 24 h, and 318 DEGs were the same at both time points). By contrast, 136, 641 and  
99 374 genes were significantly changed in liver, skeletal muscle and adipose tissues 24 h post  
100 MI compared to control, respectively. More than 33% of the DEGs that significantly changed  
101 in the other tissues also changed in the heart (**Figure 1C**). Interestingly, more than 97% of the  
102 shared DEGs between heart and skeletal muscle changed in the same direction, with  
103 corresponding numbers of 88% and 64% in adipose and liver, respectively.

104



105 *Functional analysis reveals widespread alterations of mitochondrial, fatty acid, immune,*  
106 *and protein and RNA-related biological processes post MI with liver shows contrasting*  
107 *trend*

108 We performed gene-set enrichment analysis (GSEA) with KEGG pathways (**Supplementary**  
109 **File 2, Figure 1D**) and gene ontology (GO) biological processes (BPs) (**Supplementary File**  
110 **3, Figure 2A**) to identify altered biological functions and pathways 24 h after an MI.

111 Mitochondrial functions (specifically, mitochondrial translation, respiratory chain and  
112 oxidative phosphorylation) were significantly downregulated in the heart, muscle and adipose  
113 tissues but not in the liver. Processes related to oxidative stress were upregulated in the heart  
114 and skeletal muscle. Fatty acid beta-oxidation was downregulated in the heart and adipose but  
115 upregulated in the liver. Processes and pathways related to immune systems were  
116 significantly upregulated in the heart and skeletal muscle but significantly downregulated in  
117 liver. Processes associated with protein and RNA processing, ribosome biogenesis and protein  
118 targeting endoplasmic reticulum were upregulated in all tissues except liver whereas protein  
119 processing in endoplasmic reticulum and RNA transport pathways were upregulated in all  
120 tissues.

121 We also observed that liver was showing opposite trends compared to the other tissues in  
122 other important functions, such as fatty acid metabolism and immune response. By checking  
123 regulation at the gene level, we observed that only 16 DEGs in liver showed opposite  
124 regulation compared to the other tissues whereas 97 out of the 136 DEGs in liver were not  
125 DEGs in any other tissues (**Supplementary File 4**). Therefore, the differences we observed in  
126 liver were mainly due to different DEGs rather than opposite regulation compared to other  
127 tissues.

128

129 *Tissue-specific altered biological functions point to specificity of metabolic and signaling*  
130 *responses to MI*

131 The functional analysis also indicated that several metabolic pathways (including cholesterol,  
132 ascorbate and aldarate, linoleic acid, and sphingolipid metabolism pathways) and signaling  
133 pathways (including GnRH, FoxO, cAMP and prolactin signaling pathways) were  
134 significantly upregulated in heart 6 h after an MI (**Supplementary File 2, Figure 1 - Figure**  
135 **Supplement 2**). We also observed significant down regulation of tryptophan metabolism and  
136 upregulation of glycosaminoglycan biosynthesis in heart 24 h after an MI (**Supplementary**  
137 **File 2, Figure 1 - Figure Supplement 2**). Processes related to retinol metabolism were  
138 upregulated in heart at both timepoints. Pathways that were previously associated with cardiac  
139 hypertrophy and cardiac remodeling (e.g. JAK-STAT, MAPK, estrogen, and TNF signaling  
140 pathways, and ECM-receptor interaction) were significantly upregulated in heart 6 and 24 h  
141 after an MI (**Figure 1 - Figure Supplement 4**).

142

143 Our analysis also indicated significant metabolic differences in adipose tissue 24 h after an MI  
144 (**Figure 1 - Figure Supplement 3**). Fructose and mannose metabolism, glyoxylate and  
145 dicarboxylate metabolism, glycolysis/gluconeogenesis, and pentose phosphate pathways,  
146 glycine, serine and threonine metabolism and pyrimidine metabolism, as well as endocrine  
147 systems (e.g. insulin signaling pathway and regulation of lipolysis in adipocytes) were  
148 downregulated in adipose tissue.

149 We observed that the PPAR signaling pathway was upregulated whereas glutathione was  
150 downregulated in liver 24 h post-infarction (**Figure 1 - Figure Supplement 3**). We found that  
151 sphingolipid metabolism and immune-related pathways were upregulated in skeletal muscle  
152 24 h post-infarction (**Figure 1 - Figure Supplement 3**).

153

154 ***Reporter metabolite analyses show significant alterations in fatty acid, amino acid, retinol,***  
155 ***and estrogen metabolism post MI***

156 To predict the effect of the transcriptional changes on metabolism, we performed reporter  
157 metabolite analyses (**Supplementary File 5**) using the gene-to-metabolites mapping from the  
158 Mouse Metabolic Reaction database<sup>17</sup>; results in each tissue 24 h after MI are shown in  
159 **Figure 2B**. In agreement with our analyses above, reporter metabolites related to oxidative  
160 phosphorylation, such as *ubiquinol*, *ubiquinone*, *NADH* and *NAD+*, were downregulated in all  
161 tissues except liver. Moreover, *linolenoyl-CoA*, *acetyl CoA*, and several other fatty acyl-CoA-  
162 related metabolites were downregulated in heart and adipose tissue but upregulated in liver.  
163 We also found that several *5-S-glutathionyl* metabolite forms, known to be related to  
164 phenylalanine, tyrosine and tryptophan biosynthesis, were downregulated in heart, liver and  
165 skeletal muscle. The same pattern of downregulation was also observed for metabolites  
166 related to estrogen metabolism, specifically metabolites related to oestrone and its glutathione  
167 conjugate derivative. Moreover, *12-keto-LTB4* and *12-oxo-c-LTB3*, related to leukotriene  
168 metabolism, and *hepoxilin A3*, an arachidonic acid, were also found to be downregulated in  
169 heart, liver, and skeletal muscle.

170

171 The liver showed the highest alteration in reporter metabolites, which is attributed to its role  
172 as one of the most metabolically active tissues. We found that several reporter metabolites  
173 related to retinol metabolism, namely *retinal*, *retinol*, *retinoate*, and *all-trans-18-*  
174 *hydroxyretinoic acid*, were significantly downregulated only in liver tissue. Retinol  
175 metabolism has been previously associated with MI<sup>18,19</sup>.

176

177 ***Network analyses unveil universal and tissue-specific clusters and mechanisms post MI***

178 The use of co-expression network (CN) analyses can assist in elucidating the functional  
179 relationships between genes in a specific cell and tissue<sup>8</sup>. Here, we performed CN analysis to  
180 reveal the functional relationship between the DEGs by generating tissue-specific CNs and  
181 selected highly connected genes (the top 5% positively correlated genes that fulfilled FDR <  
182 0.05) (**Table 1**). To better define the structure of the networks, we used the Leiden clustering  
183 algorithm<sup>20</sup> by maximizing the modularity scores (**Figure 3A-D**) and selected the clusters  
184 that include more than 30 genes. Next, we superimposed DEGs 24 h post-infarction onto the  
185 network (**Supplementary File 1**) and identified the components of the clusters that were

186 affected by an MI. We also used functional analysis with GO BP and KEGG pathways to  
187 understand the specific functions associated with each cluster by using the Enrichr algorithm  
188 (FDR < 0.05)<sup>21,22</sup>. We summarized the GO BP terms with Revigo (**Supplementary File 6**)<sup>23</sup>  
189 and checked the average clustering coefficient to define the centrality of each cluster  
190 (**Supplementary File 6**)<sup>8</sup>. Among the clusters, we identified the key clusters as those with  
191 the highest average clustering coefficient, allowing us to identify sets of genes whose time-  
192 dependent coordinated changes showed the strongest relationships.

193

194 Interestingly, key clusters contained genes with similar functionalities including RNA  
195 processing, transports, and RNA metabolic processes in all tissue-specific CNs  
196 (**Supplementary File 6**). In addition, we found that the majority of the DEGs associated with  
197 those clusters were significantly upregulated. These observations strengthen the findings of  
198 the functional analysis above (**Figure 2A**) and further highlight how embryonically distinct  
199 tissues display similar functional responses to MI, with the most highly connected groups of  
200 genes preserved between different tissues (**Supplementary File 6, Figure 3E**).

201

### 202 *Community detection reveals tissue-specific clusters post MI*

203 We investigated the tissue specificity of each cluster by performing enrichment analysis with  
204 data from the Mouse Gene Atlas<sup>24</sup>, which involved counting the number of tissue-specific  
205 genes.

206

207 The heart network showed the highest number of tissue-specific genes in cluster Heart-3 (302  
208 genes). Based on DEG analysis, we found that 522 genes were downregulated and 192 genes  
209 were upregulated in the cluster. The enriched GO BP terms in the cluster were mitochondrial  
210 transport, protein processing and respiratory chain, cardiac muscle cell action potential,  
211 response to muscle stretch, and heart contraction (**Figure 3F**). We observed that the results of  
212 the KEGG pathway enrichment analysis were consistent with those obtained from GO BP  
213 analysis (**Supplementary File 6**).

214

215 In the liver network, cluster Liver-2 showed the highest tissue specificity (479 genes). In this  
216 cluster, we found that 15 genes were significantly downregulated and 17 genes were  
217 significantly upregulated. Based on GO BP enrichment analysis, the genes in this cluster were  
218 associated with cholesterol metabolism and homeostasis, lipid transport, glutathione

219 metabolism, lipoprotein metabolism, and glucose 6-phosphate metabolism (**Supplementary**  
220 **File 6**). KEGG enrichment analysis also showed that the genes in the cluster were related to  
221 retinol, carbohydrate, lipid and amino-acid metabolism (**Supplementary File 6**).

222

223 The muscle network had two clusters with high tissue specificity: cluster Muscle-4 (276  
224 genes) and Muscle-5 (143 genes). Muscle-4 showed association with GO BP terms such as  
225 mitochondrial transport, protein processing and respiratory chain, response to muscle stretch,  
226 and muscle contraction (**Supplementary File 6**). In contrast, the KEGG pathway in this  
227 cluster showed relation to glycolysis/gluconeogenesis, propanoate metabolism, glyoxylate and  
228 dicarboxylate metabolism, and several signaling pathways (e.g. oxytocin, glucagon, cGMP-  
229 PKG and HIF-1) (**Supplementary File 6**). Muscle-5 was enriched in GO BP terms associated  
230 with protein dephosphorylation, muscle contraction and intracellular protein transport  
231 (**Supplementary File 6**). We also found that insulin, MAPK and Wnt signaling pathways  
232 were associated to Muscle-5 from the KEGG enrichment analysis (**Supplementary File 6**).

233

234 The adipose tissue network showed tissue specificity in cluster Adipose-2 (33 genes), which  
235 is associated with GO BP processes including mRNA processing, regulation of mitotic cell  
236 cycle phase, ribosome biogenesis, and viral processes (**Supplementary File 6**). We observed  
237 that the results of the KEGG pathway enrichment analysis were consistent with those  
238 obtained from GO BP analysis, with additional associations with multiple signaling and  
239 regulatory pathways (**Supplementary File 6**).

240

#### 241 *Tissue-specific clusters show important tissue-specific changes post MI*

242 To understand the specific behavior of each tissue, we further studied the tissue-specific  
243 clusters in the CNs (**Figure 4A**). Heart specific cluster, Heart-3, was driven by several central  
244 genes including *Pln*, *Pde4b*, and *Atp2a2* (related to regulation of cardiac muscle contraction)  
245 and *Pdha1* and *Vdac1* (related to mitochondrial functions). These genes were also found to be  
246 significantly differentially expressed in heart 24 hours post MI (**Supplementary File 1**).  
247 Genes in the heart-specific cluster were related to multiple other processes/pathways, e.g.  
248 oxytocin signaling pathway, and several metabolic pathways (glycogen, inositol phosphate  
249 and purine) (**Supplementary File 6**).

250

251 Mitochondrial dysfunction in the heart leads to disturbance of energy (ATP) production<sup>25,26</sup>  
252 and, in the presence of oxygen, to accumulation of reactive oxygen species (ROS), which can  
253 cause oxidative stress. *Vdac1*, a key gene for regulation of mitochondria function and one of  
254 the central genes in the heart-specific cluster (see above), is significantly downregulated in MI  
255<sup>27</sup>. *Vdac1* is located in the outer mitochondrial membrane and is involved directly in  
256 cardioprotection<sup>29</sup> within the cGMP/PKG pathway (**Figure 4 - Figure Supplement 1**). In the  
257 same pathway, we also observed down-regulation of the reporter metabolite hydrogen  
258 peroxide (**Supplementary File 5**), a ROS that is related to cardioprotection<sup>28,29</sup>. We also  
259 observed downregulation of *Pdha1*, which is known to have a substantial role in both the  
260 HIF-1 signaling pathway and the pyruvate metabolism pathway that converts pyruvate to  
261 acetyl-CoA in the mitochondria (**Figure 4 - Figure Supplement 2**). Acetyl-CoA is used in  
262 the TCA cycle to produce NADH and FADH<sub>2</sub>, which are both needed for ATP production  
263 and were downregulated in our reporter metabolite analysis of the heart. Our findings are thus  
264 consistent with dysfunctional mitochondria and ATP production in the heart in response to an  
265 MI. *Pdha1* has been also been linked to the heart sensitivity during to ischemic stress, where  
266 its deficiency can compromise AMP-activated protein kinase activation<sup>30</sup>.

267  
268 In skeletal muscle and adipose tissue, we found that central genes in their respective tissue-  
269 specific clusters related to fatty acid metabolism and lipid metabolism were significantly  
270 altered (**Supplementary File 6, Figure 5**). In liver-specific cluster, we found that their central  
271 genes were related to fatty-acid beta oxidation (*Cyp4a31*, *Cyp4a32*) and glutathione  
272 metabolism (*Gstm3*) (**Supplementary File 6, Figure 5A**). Alterations of fatty acid beta-  
273 oxidation and glutathione metabolism have previously been reported in non-alcoholic fatty  
274 liver disease, a known risk factor of CVD<sup>31,32</sup>. Moreover, in liver, we also found that retinol  
275 metabolism was uniquely related to genes in the liver-specific cluster, mainly driven by four  
276 significantly differentially expressed central genes of the clusters, i.e. *Cyp26a1*, *Cyp4a31*,  
277 *Cyp4a32*, and *Hsd17b6* (**Supplementary File 6**). A previous study showed that mortality  
278 from CVD in older individuals was accompanied by impaired liver ability to store retinol<sup>18</sup>.

### 280 ***Multi-tissue modeling reveals key metabolic pathways affected post MI***

281 To investigate the metabolic responses to MI in and across tissues in the mice, we constructed  
282 a multi-tissue genome-scale metabolic model. The model consisted of five tissue-specific  
283 genome scale metabolic models, namely heart, liver, skeletal muscle, adipose, and small

284 intestine. The small intestine model (for which we do not have transcriptomic data) was added  
285 to include ingestion and conversion of dietary nutrients into chylomicrons, which are directly  
286 secreted into blood and transport lipids to other tissues<sup>17</sup>. The final mouse multi-tissue model  
287 included 19,859 reactions, 13,284 metabolites, 7,116 genes and 41 compartments. We  
288 predicted the metabolic fluxes in mice 24 h after an MI or sham operation by integrating the  
289 dietary input, tissue-specific resting energy expenditure and transcriptomics data.

290

291 The modeling showed that oxygen uptake, carbon dioxide production and the oxidative  
292 phosphorylation pathway in heart, adipose and skeletal muscle were decreased in MI mice, in  
293 agreement with the downregulation of oxidative phosphorylation we observed in these tissues  
294 (**Supplementary File 7**). By contrast, liver showed slightly increased oxygen uptake, which  
295 might be due to the slightly (not statistically significant) upregulated oxidative  
296 phosphorylation (**Supplementary File 7**). These findings indicate that the changes in oxygen  
297 and carbon dioxide fluxes and the oxidative phosphorylation pathway could serve as a  
298 positive control for predicting the changes due to MI in the fluxes.

299

300 Next, we investigated the tissue-specific metabolic flux changes in the same model  
301 (**Supplementary File 7**). We found that the pentose phosphate pathway was upregulated in  
302 heart 24 hours post MI, consistent with upregulated glucose metabolism after an MI. Elevated  
303 glycolysis could allow the heart to rapidly generate energy under stress conditions, and the  
304 enhanced pentose phosphate pathway could increase the NADPH level, which could help  
305 maintain the level of reduced glutathione in heart<sup>33</sup>. In addition, we observed an increase  
306 uptake of alpha-ketoglutarate (AKG) of heart 24h after MI. It has been reported that  
307 supplementation of AKG could prevent heart from ischaemic injury<sup>34</sup>, and the increased  
308 uptake of AKG we observed after MI might be a natural protective metabolic response to MI.  
309 Moreover, we found there is a net lactate metabolic flux coming from liver to heart in the MI  
310 group. The influx of lactate has been reported to be positively correlated with the fraction of  
311 regional ejection of heart<sup>35</sup> and this net flux not only agrees well with the previous report but  
312 also additionally suggested the source of the lactate. We also found that adipose tissue  
313 secreted more ketone bodies, including acetoacetate and butyrate, into plasma; the plasma  
314 level of ketone bodies has been reported as a stress marker in acute MI<sup>36</sup>. Notably, relatively  
315 small metabolic changes were found in liver and skeletal muscle, which is probably due to the  
316 small number of transcriptomic changes in metabolic pathways in these tissues.

317



### 318 *Validating our findings with publicly available datasets*

319 We validated our observations in heart tissue in two independent cohorts of bulk RNA-seq  
320 data from mouse heart (**Supplementary File 8**). We filtered both validation cohorts to get and  
321 analyzed only 24 hours post-MI data. We found that there were 2169 DEGs from our heart 24  
322 h post MI data were validated in at least one of the independent cohorts (959 DEGs validated  
323 in both) (**Figure 6A**). We also found that 109 out of the 123 most connected genes in our  
324 heart-specific cluster were also significantly differentially expressed in at least one of the  
325 independent cohorts (81 in both). By performing functional analysis of the validation cohorts,  
326 we found that ~61% of GO BP and 84% of KEGG pathways identified in our analysis of the  
327 heart were also present in at least one of the validation cohorts 24 h after infarction (**Figure**  
328 **6B-C**). In both cohorts, we observed downregulation of mitochondrial functions and fatty acid  
329 metabolism processes. We also observed upregulation of processes and pathways related to  
330 retinol metabolism and inflammatory response in both validation cohorts.

331

### 332 *Identification of driver genes in MI*

333 We observed that *Flnc*, *Lgals3*, *Prkaca* and *Pprc1* showed important role to MI. These genes  
334 were 4 of 16 genes that were DEGs in at least three tissues and validated in both validation  
335 cohorts (**Supplementary File 9**). *Flnc*, *Lgals3* and *Pprc1* were upregulated in heart, skeletal  
336 muscle, and adipose, whereas *Prkaca* was downregulated in these three tissues. We further  
337 retrieved their neighbors at each tissue specific CNs, showed their regulations from  
338 differential expression results, and performed functional analysis in **Supplementary File 9**.

339

340 *Flnc*, which encodes filamin-C, was part of heart and skeletal muscle-specific CN cluster  
341 (**Figure S4**). Its neighbor genes were found to be significantly (FDR < 0.05) associated to  
342 several functions, including TCA cycle, pyruvate metabolism, glycolysis pathway, and  
343 involved in mitochondrial functions. Specifically, they were related to heart-specific  
344 processes in heart, VEGF signaling pathway in muscle, carbohydrate metabolism in adipose,  
345 and to MAPK signaling pathway and muscle contraction in heart and muscle.

346

347 *Lgals3* (encodes galectin-3) and *Prkaca* were among the most central genes in central clusters  
348 (**Supplementary File 6**). The neighbors of *Lgals3* were significantly related to cell cycle and  
349 protein digestion and absorption pathway in all tissues, and to RNA and mRNA related-  
350 processes in muscle and adipose tissue. The neighbors of *Prkaca* were related to insulin



351 signaling pathway in heart and adipose, and several mitochondrial functions in adipose. *Pprc1*  
352 was part of most central clusters in heart and adipose tissue CN, and its neighbors were  
353 related to ribosomal RNA processing and ribosome biogenesis.  
354

## 355 **Discussion**

356 CVD has a complex etiology and is responsible for a range of systemic effects, hindering our  
357 understanding of its consequences on different tissues. Here, we took advantage of the  
358 technological advances in high-throughput RNA-seq and applied integrative network analyses  
359 to comprehensively explore the underlying biological effects of MI. Specifically, we  
360 generated RNA-seq data from heart, liver, skeletal muscle and adipose tissue obtained from  
361 mice 6 and 24 h after an MI or sham operation. We used transcriptomics data analyses  
362 (differential expression, functional analysis, and reporter metabolites analysis) to determine  
363 the systemic effects of the MI across multiple tissues. Moreover, we performed CN analyses  
364 to pinpoint important key and tissue-specific clusters in each tissue, and identified the key  
365 genes in each cluster. Finally, we used a whole-body modelling approach to identify the  
366 crosstalk between tissues and reveal the global metabolic alterations, before finally validating  
367 our findings with publicly available independent MI cohorts.

368

369 Based on our analyses, we observed downregulation of heart-specific functions and  
370 upregulation of lipid metabolism and inflammatory response in heart, muscle, and adipose  
371 tissue after an MI (**Figure 4B**). Liver showed a distinct response with respect to the other  
372 three tissues, including downregulation of inflammatory response. We observed that fatty acid  
373 metabolism was downregulated in heart and adipose tissue, whereas fatty acid beta-oxidation  
374 was upregulated and glutathione metabolism was downregulated in liver. We also observed  
375 upregulation of oxidative stress in heart and skeletal muscle. We also observed  
376 downregulation of mitochondrial functions in heart, muscle, and adipose tissue. Furthermore,  
377 we found upregulation of retinol metabolism in heart and downregulation of retinol  
378 metabolites in liver (**Figure 4B**).

379

380 We hypothesized that downregulation of fatty acid metabolism from adipose tissue was due to  
381 exchange of fatty acids with other tissues (liver and muscle) (**Figure 4B**). We also observed  
382 the flow of retinol from liver to heart during MI, consistent with previous reports<sup>19</sup>. These  
383 MI-associated alterations lead to dysfunctional mitochondria and decreased energy  
384 production, especially in heart and skeletal muscle.

385

386 We also validated our results with publicly available MI datasets generated in separate  
387 independent studies. The validation results strengthened our findings on the altered  
388 functions/pathways and the important heart-specific genes after an MI.

389

390 Importantly, our analyses of gene clusters highlighted multiple key genes in the response to  
391 MI in different tissues. Specifically, we observed that *Flnc*, *Prkaca*, *Lgals3*, and *Pprc1*  
392 showed important responses in heart, skeletal muscle, and adipose tissue. *Flnc* is involved in  
393 actin cytoskeleton organization in heart and skeletal muscle, and previous studies have shown  
394 that this gene has critical role in CVD<sup>37,38</sup>. Similarly, *Prkaca*, an important metabolic gene,  
395 has also been shown to play an important function during CVD<sup>39-41</sup>. *Lgals3*, related to acute  
396 inflammation response, has been studied intensively in recent years as a key gene in CVD,  
397 and as a potential CVD therapy target<sup>42,43</sup>. Lastly, *Pprc1*, as important regulator of  
398 mitochondrial biogenesis, has not been explored for its direct relationship with CVD;  
399 however, mitochondrial biogenesis appears to be an important response to CVD<sup>44-46</sup>.

400

401 We recognized several limitations to be noted on this research. First, only transcriptomic data  
402 was analyzed in this research, hence the sensitivity might be limited especially for short  
403 timepoint, e.g. 6 hours after MI. Second, we focused our analysis in this research only on  
404 protein-coding genes. Third, to explore more about the shift in metabolism due to MI, longer  
405 timepoints needs to be explored. This opens new opportunities for future research, including  
406 analyzing the non-protein-coding gene signatures and longer timepoints.

407

408 In summary, we systematically unveiled the deregulation of biological processes and  
409 pathways that resulted from MI in heart, liver, muscle, and adipose tissue by integrating  
410 transcriptomic data and the use of biological networks. We also identified the key clusters and  
411 central genes using generated tissue-specific CNs. In this study, we demonstrated a strategy to  
412 utilize multi-tissue transcriptomic data to identify alteration of biological processes and  
413 pathways to systemically explore the effect of a disease.

414

#### 415 **Author Contribution**

416 MK performed the animal experiments, MA performed the computational analysis and  
417 analyzed the clinical data together with RB, SD, HT, MU, MC, JW, DE, CZ, AM, and JB

418 coordinated the generation of the clinical data. MA, MK, AM and JB wrote the paper and all  
419 authors were involved in editing the paper.

420

421 **Acknowledgements**

422 This work was financially supported by the Knut and Alice Wallenberg Foundation, Swedish  
423 Research Foundation and Swedish Heart-Lung Foundation.

424

425 **Conflict of Interest**

426 JW, MC, DE are employees at AstraZeneca. The other authors declare no conflict of interest.

427

428 **Material and Methods**

| <b>Key Resources Table</b>                |                                           |                            |                    |                                  |
|-------------------------------------------|-------------------------------------------|----------------------------|--------------------|----------------------------------|
| <b>Reagent type (species) or resource</b> | <b>Designation</b>                        | <b>Source or reference</b> | <b>Identifiers</b> | <b>Additional information</b>    |
| commercial assay or kit                   | RNeasy Fibrous Tissue Mini Kit            | Qiagen                     |                    | Heart and Skeletal Muscle Tissue |
| commercial assay or kit                   | RNeasy Mini Kit                           | Qiagen                     |                    | Liver Tissue                     |
| commercial assay or kit                   | RNeasy Lipid Tissue Mini Kit              | Qiagen                     |                    | Adipose Tissue                   |
| commercial assay or kit                   | cDNA Reverse Transcription Kit            | Applied Biosystems         |                    |                                  |
| commercial assay or kit                   | TaqMan real-time PCR in a ViiA™ 7 system  | Applied Biosystems         |                    |                                  |
| commercial assay or kit                   | NovaSeq6000                               | Illumina                   |                    |                                  |
| software, algorithm                       | NovaSeq Control Software 1.6.0/RNA v3.4.4 | Illumina                   |                    |                                  |
| software, algorithm                       | CASAVA Software Suite                     | Illumina                   |                    |                                  |
| software, algorithm                       | Kallisto                                  |                            | RRID:SCR_016582    |                                  |
| software,                                 | Python 3.7                                | Python                     | RRID:SCR_008394    |                                  |

|                     |                   |                                     |                                                                                       |  |
|---------------------|-------------------|-------------------------------------|---------------------------------------------------------------------------------------|--|
| algorithm           |                   | Programming Language                |                                                                                       |  |
| software, algorithm | sklearn           | Python Package                      | RRID:SCR_019053                                                                       |  |
| software, algorithm | R                 | R Project for Statistical Computing | RRID:SCR_001905                                                                       |  |
| software, algorithm | Rpy2              | Python Package                      | <a href="https://rpy2.github.io/">https://rpy2.github.io/</a>                         |  |
| software, algorithm | DESeq2            | R Package                           | RRID:SCR_015687                                                                       |  |
| software, algorithm | PIANO             | R Package                           | RRID:SCR_003200                                                                       |  |
| software, algorithm | SciPy             | Python Package                      | RRID:SCR_008058                                                                       |  |
| software, algorithm | Statsmodel        | Python Package                      | RRID:SCR_016074                                                                       |  |
| software, algorithm | iGraph            | Python Package                      | RRID:SCR_019225                                                                       |  |
| software, algorithm | Leiden Clustering | Python Package                      | <a href="https://github.com/vtraag/leidenalg">https://github.com/vtraag/leidenalg</a> |  |
| software, algorithm | Matlab            | Mathworks                           | RRID:SCR_001622                                                                       |  |

429

430 ***Induction of MI***

431 10-week-old male C57Bl/6N mice were fasted for 4 h before induction of myocardial  
432 infarction. The mice were then anesthetized with isoflurane, orally intubated, and connected  
433 to a small-animal ventilator (SAR-830, Geneq, Montreal, Canada) distributing a mixture of  
434 oxygen, air and 2–3% isoflurane. ECG electrodes were placed on the extremities, and cardiac  
435 rhythm was monitored during surgery. An incision was made between the 4th and 5th ribs to  
436 reveal the upper part of the anterior left ventricle (LV) wall and the lower part of the left  
437 atrium. Myocardial infarction was induced by ligating the left anterior descending (LAD)  
438 coronary artery immediately after the bifurcation of the left coronary artery 1. The efficacy of  
439 the procedure was immediately verified by characteristic ECG changes, and akinesis of the  
440 LV anterior wall. After verification of the infarction, the lungs were hyperinflated, positive

441 end-expiratory pressure was applied, and the chest was closed. Sham mice were handled  
442 identically (fasted, anesthetized, intubated, and connected to ventilator, and subsequently  
443 incised between 4<sup>th</sup> and 5<sup>th</sup> ribs), but no ligation of the LAD coronary artery was performed  
444 (and thus, no ischemia was induced in these mice). The mice received an intraperitoneal  
445 injection of 0.1 ml buprenorphine to relieve postoperative pain and were allowed to recover  
446 spontaneously after stopping isoflurane administration. Mice were killed with an overdose of  
447 isoflurane 6 h or 24 h after occlusion or sham operation. We collected the left ventricle (the  
448 whole left ventricle containing mainly infarcted tissue) of the heart, whereas white adipose  
449 tissue (WAT) was collected from the abdomen and musculus soleus was taken as the muscle  
450 tissue. Mouse hearts and biopsies from the liver, muscle and WAT were snap-frozen in liquid  
451 nitrogen and stored at -80°C until analysis. All mice studies were approved by the local  
452 animal ethics committee and conform to the guidelines from Directive 2010/63/EU of the  
453 European Parliament on the protection of animals used for scientific purposes.

454

#### 455 *Echocardiography in mice*

456 Echocardiographic examination, using VisualSonics VEVO 2100 system (VisualSonics Inc,  
457 Ontario, Canada), which includes an integrated rail system for consistent positioning of the  
458 ultrasound probe was performed 6 and 24 h after an MI to determine the size of the MI. We  
459 calculated infarct size based on wall motion score index (WMSI) 24 h after myocardial  
460 infarction by a 16-segments model on 3 short axis images, as 0 for normal, ½ for reduced wall  
461 thickening and excursion in a segment and 1 for no wall thickening and excursion in a  
462 segment. WMSI was calculated as the sum of scores divided by the total number of segments.  
463 Hair removal gel was applied to isoflurane-anesthetized (1.2%) mice chest to minimize  
464 resistance to ultrasonic beam transmission. The mice were then placed on a heating pad and  
465 extremities were connected to an ECG. A 55 MHz linear transducer (MS550D) was used for  
466 imaging. An optimal parasternal long axis (LAX) cine loop of >1000 frames/s was acquired  
467 using the ECG-gated kilohertz visualization technique. Parasternal short axis cine-loops were  
468 acquired at 1, 3, and 5 mm below the mitral annulus. Infarct size was calculated based on wall  
469 motion score index 6 and 24 hours after myocardial infarction by a 16-segments model on  
470 LAX and 3 short axis images view, as 0 for normal, ½ for reduced wall thickening and  
471 excursion in a segment and 1 for no wall thickening and excursion in a segment. The data  
472 were evaluated using VevoStrain™ software system (VisualSonics Inc, Ontario, Canada).

473

#### 474 ***RNA extraction and sequencing***

475 Total RNA was isolated from snap-frozen tissues using RNeasy Fibrous Tissue Mini Kit  
476 (Qiagen) for heart and skeletal muscle, RNeasy Mini Kit (Qiagen) for liver, or RNeasy Lipid  
477 Tissue Mini Kit (Qiagen) for adipose tissue. cDNA was synthesized with the high-capacity  
478 cDNA Reverse Transcription Kit (Applied Biosystems) and random primers. mRNA  
479 expression of genes of interest was analyzed with TaqMan real-time PCR in a ViiA™ 7  
480 system (Applied Biosystems). RNA sequencing libraries were prepared with Illumina RNA-  
481 Seq with Poly-A selections. Subsequently, the libraries were sequenced on NovaSeq6000  
482 (NovaSeq Control Software 1.6.0/RNA v3.4.4) with a 2x51 setup using ‘NovaSeqXp’  
483 workflow in ‘S1’ mode flow cell. The Bcl was converted to FastQ by bcl2fastq\_v2.19.1.403  
484 from CASAVA software suite (Sanger/phred33/Illumina 1.8+ quality scale).

485

#### 486 ***RNA-sequencing data analysis***

487 The raw RNA-sequencing results were processed using Kallisto<sup>47</sup> with index file generated  
488 from the Ensembl mouse reference genome (Release-96)<sup>48</sup>. The output from Kallisto, both  
489 estimated count and TPM (Transcript per kilobase million), were subsequently mapped to gene  
490 using the mapping file retrieved from Ensembl BioMart website, by filtering only protein  
491 coding genes and transcripts. Genes with mean expression less than 1 TPM in each condition  
492 were filtered. For data exploration, we used PCA from sklearn package<sup>49</sup> in Python 3.7 and  
493 used TPM values as the input.

494 Subsequently, we performed differential gene expression analysis using DESeq2<sup>50</sup> package in  
495 R. We utilized the capabilities from DESeq2 to normalize the rounded estimated count data  
496 and to correct for confounding factors (such as time). To define a gene as differentially  
497 expressed (DEGs), a gene has to fulfill a criterion of FDR < 5%. The results of differential  
498 expression analysis were then used for functional analysis.

499

500 We checked the tissue specificity of the DEGs in each tissue with the data from Mouse Gene  
501 Atlas<sup>24</sup>. For all the tissue-specific genes, we also checked their human-homolog genes in the  
502 human secretome database<sup>51</sup>.

503



## 504 ***Functional analysis***

505 We performed functional analysis using the R package PIANO<sup>52</sup>. As the input, we used the  
506 fold changes and p-values from the DESeq2, and also GO BP and KEGG pathways gene-set  
507 collections from Enrichr<sup>21,22</sup>, and metabolites from Mouse Metabolic Reaction database<sup>17</sup>.  
508 To define a process or pathway as significant, we used a cut off of FDR < 5% for the distinct  
509 direction of PIANO (both up and down).

510

## 511 ***Co-expression network generation***

512 We generated the co-expression network by generating gene-gene Spearman correlation ranks  
513 within a tissue type, using *spearmanr* function from SciPy<sup>53</sup> in Python 3.7. Using the same  
514 environment, we performed multiple hypothesis testing using Benjamini-Hochberg method  
515 from *statsmodels*<sup>54</sup>. Correlation data were filtered with criterion of adjusted p-value < 5%.

516

517 The top 5% of filtered correlation results were then loaded into iGraph module<sup>55</sup> in Python  
518 3.7 as an unweighted network. To find the subnetworks, we employed the Leiden clustering  
519 algorithm<sup>20</sup> with *ModularityVertexPartition* method. Each cluster was analyzed by using  
520 Enrichr<sup>21,22</sup> to get the enriched GO BP and KEGG pathways. Criterion FDR < 0.05 were used  
521 to find the significantly enriched terms. Clusters with less than 30 genes were discarded, to be  
522 able to get significant functional analysis results. Since GO BP was relatively sparse, we used  
523 Revigo<sup>23</sup> to summarize the GO BP into a higher level. Revigo was further employed to build  
524 a GO BP network. Clustering coefficient was calculated based on the average local clustering  
525 coefficient function within iGraph.

526

## 527 ***Multi-tissue metabolic modeling***

528 We combined tissue-specific models (of heart, liver, muscle, adipose and small intestine)  
529 constructed previously<sup>17</sup> in a multi-tissue model by adding an additional compartment  
530 representing the plasma, which allows the exchange of metabolites among different tissues.  
531 Blocked reactions that could not carry fluxes (and the unused metabolites and genes linked to  
532 these reactions) were removed from the models. In addition, the dietary input reactions and  
533 constraints were added to the small intestine model to simulate the food intake  
534 (**Supplementary File 7**). Specifically, we assumed that the mice weighed 30 g and consumed  
535 4.5 g chow diet per day (15 g/100 g body weight) based on a previous study<sup>56</sup>. We also

536 calculated the tissue-specific resting energy expenditures and set them as mandatory  
537 metabolic constraints based on previous studies and resting energy expenditure for other  
538 tissues was incorporated by including a mandatory glucose secretion flux out from the system  
539 with the lower bound calculated based on ATP (**Supplementary File 7**)<sup>56</sup>.

540

541 To simulate the metabolic flux distribution in the sham-operated mice, we set the lipid droplet  
542 accumulation reaction in adipose tissue (m3\_Adipose\_LD\_pool) as the objective function as  
543 we assume the energy additional to the resting energy expenditure will be mostly stored as fat  
544 rather than used by the muscle for physical activities because mice raised in the cages might  
545 have very little exercise. Then, we used parsimonious FBA to calculate the flux distribution.  
546 To simulate the flux distribution after an MI, we calculated an expected flux fold change of  
547 each reaction based on the FDR and expression fold changes of all genes associated with the  
548 reaction, and obtains a flux distribution that is closest to this expected flux distribution while  
549 satisfying the stoichiometric balance and flux constraints of the model. The mathematical  
550 formulation of the method is described as below,

$$\begin{aligned} \text{minimize } Z &= \sum_i |v_i - v_i^{exp}| \\ \text{s. t. } S * v &= 0 \\ lb &\leq v \leq ub \end{aligned}$$

551 where  $S$ ,  $v$ ,  $lb$ ,  $ub$  represent the stoichiometric matrix, flux distribution, lower bound and  
552 upper bound of all reactions, respectively. The  $v_i^{exp}$  represents the expected flux of  $i^{\text{th}}$   
553 reaction which is calculated as follows,

$$v_i^{exp} = v_i^{ref} * \sqrt{\prod_{j=1}^m FC_j}$$

554 where  $n$  is the number of gene sets that could independently catalyze the corresponding  
555 reaction, and  $FC_j$  represents the expected expression changes of  $j^{\text{th}}$  gene set which is  
556 calculated below,

$$FC_j = (1 - P_1) * fc_1 + P_1(1 - P_2) * fc_2 + \dots + \prod_{k=1}^{m-1} P_k(1 - P_n) * fc_n$$

557 where  $m$  is the number of genes in the  $i^{\text{th}}$  gene sets, and  $P_j$  and  $fc_j$  respectively represents the  
558 FDR and fold change of gene expression with  $j^{\text{th}}$  smallest fold change in this gene set. In this  
559 way, genes with lowest fold change will have a dominating effect within a gene set encoding

560 a protein complex, while the geometric mean of expected fold changes of gene sets encoding  
561 different isozymes of this reaction will be used as the final expected flux fold change of this  
562 reaction.

563

#### 564 *Validation of the results*

565 We validated our findings by performing similar steps of RNA sequencing and functional  
566 analysis for the publicly available mouse MI datasets GSE104187 and GSE52313<sup>13,14</sup>.

567

#### 568 *Data and code availability*

569 All raw RNA-sequencing data generated from this study can be accessed through accession  
570 number GSE153485. Codes used during the analysis are available on

571 [https://github.com/sysmedicine/ArifEtAl\\_2020\\_MultiTissueMI](https://github.com/sysmedicine/ArifEtAl_2020_MultiTissueMI)

## 572 **References**

- 573 1 Mardinoglu, A., Boren, J., Smith, U., Uhlen, M. & Nielsen, J. The employment of  
574 systems biology in gastroenterology and hepatology. *Nat. Rev. Gastroenterol. Hepatol*  
575 (2017).
- 576 2 Mardinoglu, A. & Nielsen, J. New paradigms for metabolic modeling of human cells.  
577 *Current Opinion in Biotechnology* **34**, 91-97 (2015).
- 578 3 Nielsen, J. Systems biology of metabolism: a driver for developing personalized and  
579 precision medicine. *Cell metabolism* **25**, 572-579 (2017).
- 580 4 Turanli, B. *et al.* Discovery of therapeutic agents for prostate cancer using genome-  
581 scale metabolic modeling and drug repositioning. *EBioMedicine* **42**, 386-396 (2019).
- 582 5 Benfeitas, R. *et al.* Characterization of heterogeneous redox responses in  
583 hepatocellular carcinoma patients using network analysis. *EBioMedicine* **40**, 471-487  
584 (2019).
- 585 6 Bidkhori, G. *et al.* Metabolic network-based stratification of hepatocellular carcinoma  
586 reveals three distinct tumor subtypes. *Proceedings of the National Academy of*  
587 *Sciences* **115**, E11874-E11883 (2018).
- 588 7 Lee, S. *et al.* Integrated network analysis reveals an association between plasma  
589 mannose levels and insulin resistance. *Cell metabolism* **24**, 172-184 (2016).
- 590 8 Lee, S. *et al.* Network analyses identify liver-specific targets for treating liver  
591 diseases. *Molecular systems biology* **13** (2017).
- 592 9 Bakhtiarzadeh, M. R., Hosseinpour, B., Shahhoseini, M., Korte, A. & Gifani, P.  
593 Weighted Gene Co-expression Network Analysis of Endometriosis and Identification  
594 of Functional Modules Associated With Its Main Hallmarks. *Frontiers in Genetics* **9**,  
595 doi:10.3389/fgene.2018.00453 (2018).
- 596 10 Mukund, K. & Subramaniam, S. Co-expression network approach reveals functional  
597 similarities among diseases affecting human skeletal muscle. *Frontiers in physiology*  
598 **8**, 980 (2017).
- 599 11 Pedrotty, D. M., Morley, M. P. & Cappola, T. P. Transcriptomic biomarkers of  
600 cardiovascular disease. *Progress in cardiovascular diseases* **55**, 64-69 (2012).
- 601 12 Das, S. *et al.* Transcriptomics of cardiac biopsies reveals differences in patients with  
602 or without diagnostic parameters for heart failure with preserved ejection fraction.  
603 *Scientific reports* **9**, 3179 (2019).
- 604 13 Ounzain, S. *et al.* Genome-wide profiling of the cardiac transcriptome after  
605 myocardial infarction identifies novel heart-specific long non-coding RNAs.  
606 *European heart journal* **36**, 353-368 (2014).
- 607 14 Williams, A. L. *et al.* HIF1 mediates a switch in pyruvate kinase isoforms after  
608 myocardial infarction. *Physiological genomics* **50**, 479-494 (2018).
- 609 15 Priest, C. & Tontonoz, P. Inter-organ cross-talk in metabolic syndrome. *Nature*  
610 *Metabolism*, doi:10.1038/s42255-019-0145-5 (2019).
- 611 16 Lex, A., Gehlenborg, N., Strobel, H., Vuillemot, R. & Pfister, H. UpSet: visualization  
612 of intersecting sets. *IEEE transactions on visualization and computer graphics* **20**,  
613 1983-1992 (2014).

- 614 17 Mardinoglu, A. *et al.* The gut microbiota modulates host amino acid and glutathione  
615 metabolism in mice. *Molecular Systems Biology* **11**, 834, doi:10.15252/msb.20156487  
616 (2015).
- 617 18 Lima, I., Peres, W., Cruz, S. & Ramalho, A. Association of Ischemic Cardiovascular  
618 Disease with Inadequacy of Liver Store of Retinol in Elderly Individuals. *Oxidative*  
619 *medicine and cellular longevity* **2018** (2018).
- 620 19 Palace, V. P., Hill, M. F., Khaper, N. & Singal, P. K. Metabolism of vitamin A in the  
621 heart increases after a myocardial infarction. *Free Radical Biology and Medicine* **26**,  
622 1501-1507 (1999).
- 623 20 Traag, V. A., Waltman, L. & van Eck, N. J. From Louvain to Leiden: guaranteeing  
624 well-connected communities. *Scientific reports* **9** (2019).
- 625 21 Chen, E. Y. *et al.* Enrichr: interactive and collaborative HTML5 gene list enrichment  
626 analysis tool. *BMC Bioinformatics* **14**, 128, doi:10.1186/1471-2105-14-128 (2013).
- 627 22 Kuleshov, M. V. *et al.* Enrichr: a comprehensive gene set enrichment analysis web  
628 server 2016 update. *Nucleic Acids Research* **44**, W90-W97, doi:10.1093/nar/gkw377  
629 (2016).
- 630 23 Supek, F., Bošnjak, M., Škunca, N. & Šmuc, T. REVIGO summarizes and visualizes  
631 long lists of gene ontology terms. *PLoS one* **6**, e21800 (2011).
- 632 24 Su, A. I. *et al.* A gene atlas of the mouse and human protein-encoding transcriptomes.  
633 *Proceedings of the National Academy of Sciences of the United States of America* **101**,  
634 6062-6067, doi:10.1073/pnas.0400782101 (2004).
- 635 25 Kiyuna, L. A., e Albuquerque, R. P., Chen, C.-H., Mochly-Rosen, D. & Ferreira, J. C.  
636 B. Targeting mitochondrial dysfunction and oxidative stress in heart failure:  
637 challenges and opportunities. *Free Radical Biology and Medicine* **129**, 155-168  
638 (2018).
- 639 26 Palaniyandi, S. S., Qi, X., Yogalingam, G., Ferreira, J. C. B. & Mochly-Rosen, D.  
640 Regulation of mitochondrial processes: a target for heart failure. *Drug Discovery*  
641 *Today: Disease Mechanisms* **7**, e95-e102 (2010).
- 642 27 Camara, A. K., Zhou, Y., Wen, P.-C., Tajkhorshid, E. & Kwok, W.-M. Mitochondrial  
643 VDAC1: a key gatekeeper as potential therapeutic target. *Frontiers in physiology* **8**,  
644 460 (2017).
- 645 28 Schwertz, H. *et al.* Myocardial ischemia/reperfusion causes VDAC phosphorylation  
646 which is reduced by cardioprotection with a p38 MAP kinase inhibitor.  
647 *PROTEOMICS* **7**, 4579-4588, doi:10.1002/pmic.200700734 (2007).
- 648 29 Yada, T. *et al.* Cardioprotective role of endogenous hydrogen peroxide during  
649 ischemia-reperfusion injury in canine coronary microcirculation in vivo. *American*  
650 *Journal of Physiology-Heart and Circulatory Physiology* **291**, H1138-H1146 (2006).
- 651 30 Sun, W. *et al.* Cardiac-specific deletion of the Pdhal gene sensitizes heart to  
652 toxicological actions of ischemic stress. *Toxicological Sciences* **151**, 193-203 (2016).
- 653 31 Mardinoglu, A. *et al.* Personal model-assisted identification of NAD<sup>+</sup> and  
654 glutathione metabolism as intervention target in NAFLD. *Molecular systems biology*  
655 **13** (2017).

- 656 32 Alexander, M. *et al.* Non-alcoholic fatty liver disease and risk of incident acute  
657 myocardial infarction and stroke: findings from matched cohort study of 18 million  
658 European adults. *bmj* **367**, 15367 (2019).
- 659 33 Tran, D. H. & Wang, Z. V. Glucose Metabolism in Cardiac Hypertrophy and Heart  
660 Failure. *Journal of the American Heart Association* **8**, e012673 (2019).
- 661 34 Kjellman, U. *et al.* Alpha-ketoglutarate for myocardial protection in heart surgery.  
662 *Lancet* **345**, 552-553, doi:10.1016/s0140-6736(95)90466-2 (1995).
- 663 35 Hattori, R. *et al.* Lactate metabolism in acute myocardial infarction and its relation to  
664 regional ventricular performance. *J Am Coll Cardiol* **5**, 1283-1291,  
665 doi:10.1016/s0735-1097(85)80338-7 (1985).
- 666 36 Miyamoto, T., Katayama, Y. & Harano, Y. Blood ketone body as a stress marker in  
667 acute myocardial infarction. *Nihon Kyukyu Igakukai Zasshi* **10**, 621-622 (1999).
- 668 37 Zhou, Y. *et al.* Loss of Filamin C Is Catastrophic for Heart Function. *Circulation* **141**,  
669 869-871 (2020).
- 670 38 Hall, C. L. *et al.* RNA sequencing-based transcriptome profiling of cardiac tissue  
671 implicates novel putative disease mechanisms in FLNC-associated arrhythmogenic  
672 cardiomyopathy. *International journal of cardiology* **302**, 124-130 (2020).
- 673 39 Diviani, D., Dodge-Kafka, K. L., Li, J. & Kapiloff, M. S. A-kinase anchoring proteins:  
674 scaffolding proteins in the heart. *American Journal of Physiology-Heart and*  
675 *Circulatory Physiology* **301**, H1742-H1753 (2011).
- 676 40 Turnham, R. E. & Scott, J. D. Protein kinase A catalytic subunit isoform PRKACA;  
677 History, function and physiology. *Gene* **577**, 101-108 (2016).
- 678 41 Bers, D. M. Calcium cycling and signaling in cardiac myocytes. *Annu. Rev. Physiol.*  
679 **70**, 23-49 (2008).
- 680 42 Zhong, X., Qian, X., Chen, G. & Song, X. The role of galectin-3 in heart failure and  
681 cardiovascular disease. *Clinical and Experimental Pharmacology and Physiology* **46**,  
682 197-203 (2019).
- 683 43 Suthahar, N. *et al.* Galectin-3 activation and inhibition in heart failure and  
684 cardiovascular disease: an update. *Theranostics* **8**, 593 (2018).
- 685 44 Ren, J., Pulakat, L., Whaley-Connell, A. & Sowers, J. R. Mitochondrial biogenesis in  
686 the metabolic syndrome and cardiovascular disease. *Journal of molecular medicine*  
687 **88**, 993-1001 (2010).
- 688 45 Siasos, G. *et al.* Mitochondria and cardiovascular diseases—from pathophysiology to  
689 treatment. *Annals of translational medicine* **6** (2018).
- 690 46 Piantadosi, C. A. & Suliman, H. B. Transcriptional control of mitochondrial  
691 biogenesis and its interface with inflammatory processes. *Biochimica et Biophysica*  
692 *Acta (BBA)-General Subjects* **1820**, 532-541 (2012).
- 693 47 Bray, N. L., Pimentel, H., Melsted, P. & Pachter, L. Near-optimal probabilistic RNA-  
694 seq quantification. *Nature biotechnology* **34**, 525 (2016).
- 695 48 Zerbino, D. R. *et al.* Ensembl 2018. *Nucleic Acids Research* **46**, D754-D761,  
696 doi:10.1093/nar/gkx1098 (2017).
- 697 49 Pedregosa, F. *et al.* Scikit-learn: Machine learning in Python. *Journal of machine*  
698 *learning research* **12**, 2825-2830 (2011).

- 699 50 Love, M. I., Huber, W. & Anders, S. Moderated estimation of fold change and  
700 dispersion for RNA-seq data with DESeq2. *Genome Biol* **15**, 550,  
701 doi:10.1186/s13059-014-0550-8 (2014).
- 702 51 Uhlén, M. *et al.* The human secretome. *Science Signaling* **12**, eaaz0274,  
703 doi:10.1126/scisignal.aaz0274 (2019).
- 704 52 Våremo, L., Nielsen, J. & Nookaew, I. Enriching the gene set analysis of genome-  
705 wide data by incorporating directionality of gene expression and combining statistical  
706 hypotheses and methods. *Nucleic Acids Research* **41**, 4378-4391,  
707 doi:10.1093/nar/gkt111 (2013).
- 708 53 Jones, E., Oliphant, T. & Peterson, P. SciPy: Open source scientific tools for Python.  
709 (2001).
- 710 54 Perktold, J., Seabold, S. & Taylor, J. (Oct, 2017).
- 711 55 Csardi, G. & Nepusz, T. The igraph software package for complex network research.  
712 *InterJournal, Complex Systems* **1695**, 1-9, doi:10.5281/zenodo.3630268 (2006).
- 713 56 Kummitha, C. M., Kalhan, S. C., Saidel, G. M. & Lai, N. Relating tissue/organ energy  
714 expenditure to metabolic fluxes in mouse and human: experimental data integrated  
715 with mathematical modeling. *Physiological reports* **2** (2014).
- 716
- 717



718 **Table**

719 Table 1 Properties of the co-expression network

| Tissue  | # of Genes | # of Edges | # of Clusters | Modularity Scores |
|---------|------------|------------|---------------|-------------------|
| Heart   | 8793       | 1570898    | 7             | 0.540             |
| Liver   | 7760       | 1103589    | 6             | 0.577             |
| Muscle  | 8834       | 1660603    | 7             | 0.521             |
| Adipose | 10790      | 2636378    | 8             | 0.495             |

720

721 **Figure Supplements**

722 **Figure 1 - Figure Supplement 1** Data Exploration of the Samples

723 **Figure 1 - Figure Supplement 2** KEGG pathway analysis results for Heart 6- and 24- hours

724 post MI

725 **Figure 1 - Figure Supplement 3** KEGG pathway analysis results for each tissue Liver,

726 Muscle, and Adipose tissue 24 hours post MI.

727 **Figure 1 - Figure Supplement 4** KEGG pathways related to cardiac problems show

728 activation after an MI.

729 **Figure 4 - Figure Supplement 1** cGMP-PKG with overlay data from differential expression

730 and reporter metabolites analysis.

731 **Figure 4 - Figure Supplement 2** HIF-1 signaling pathway with overlay data from differential

732 expression and reporter metabolites analysis.

733 **Supplementary Files**

734 **Supplementary File 1** Differential Expression Analysis Results



- 735 **Supplementary File 2** KEGG Pathways
- 736 **Supplementary File 3** Gene Ontology Biological Processes
- 737 **Supplementary File 4** DEG comparison between Liver and other tissues
- 738 **Supplementary File 5** Reporter Metabolite Analysis
- 739 **Supplementary File 6** Enrichment Analyses of Clusters, Clusters properties
- 740 **Supplementary File 7** Food Intake, Energy Expenditure, and Flux Balance Analysis (FBA)
- 741 of Whole-Body Modeling
- 742 **Supplementary File 8** Validation Result (Differential Expression and Functional Analysis)
- 743 **Supplementary File 9** Detailed Information of 16 Key Genes that are DEGs in at least 3
- 744 tissues and Neighbors and Functional Analysis Results of The Neighbors of 4 key genes

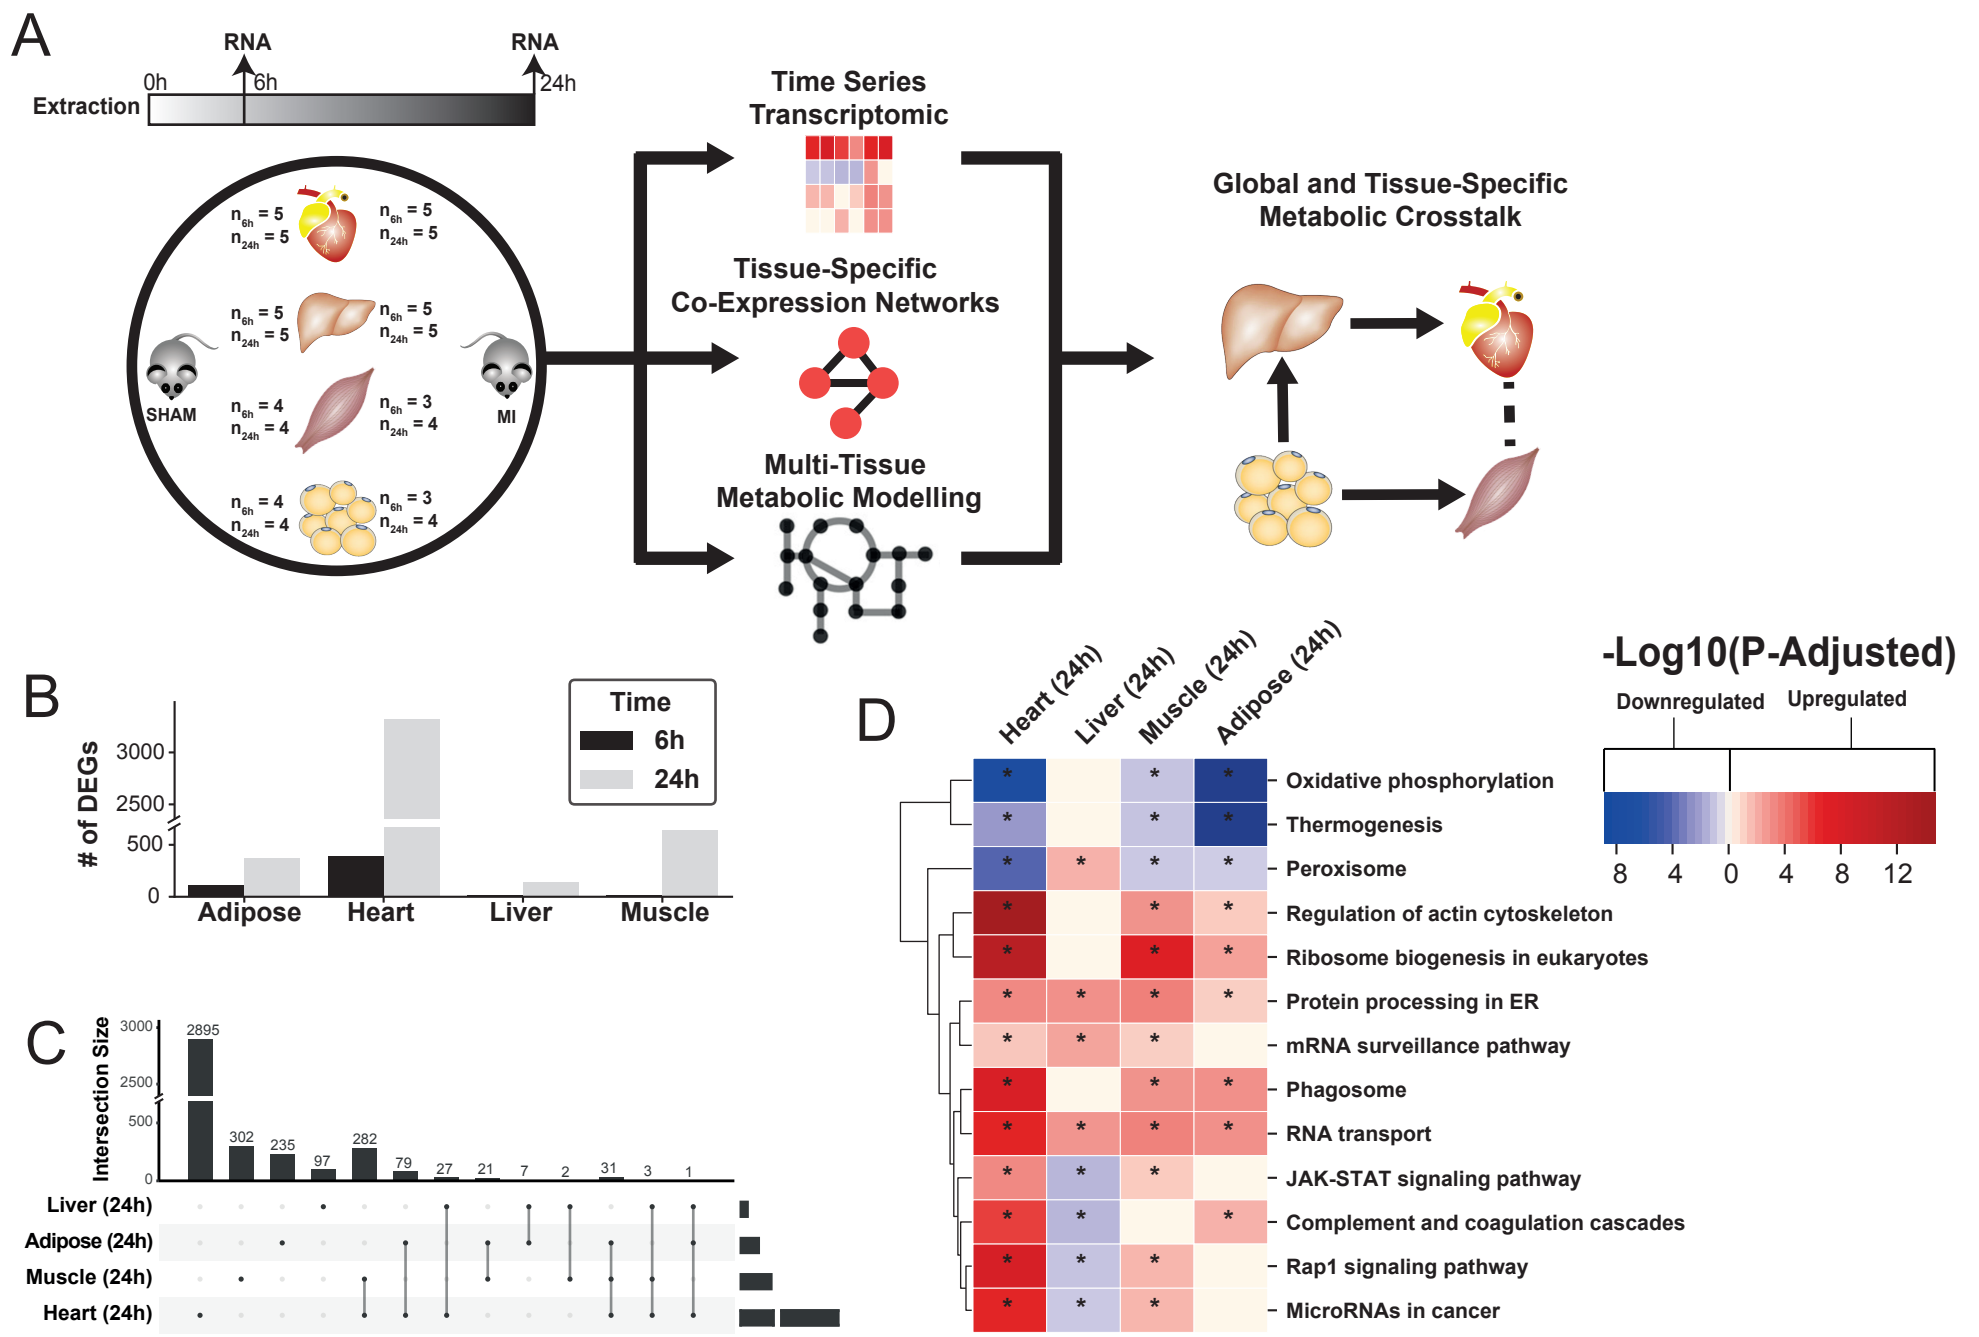

**Figure 1** (A) Overview of this study (B) Number of differentially expressed genes for each tissue at each time point. Effect of MI shown to be more pronounced after 24 h. (C) UpSet plot to show intersection between differentially expressed genes (FDR < 5%) in different tissues. The plot showed that each tissue has its specific set of genes that were affected by MI. (D) KEGG pathway analysis (FDR < 0.05 in at least 3 tissues) for 24 hours post MI compared to its control for each tissue. We observed that 141 (5 upregulated) and 125 (14 upregulated) pathways are significantly altered in heart 6 and 24 h after infarction, respectively. For other tissues, we found that 24 (9 upregulated), 61 (54 upregulated) and 48 (15 upregulated) pathways are altered in liver, muscle, and adipose, respectively.

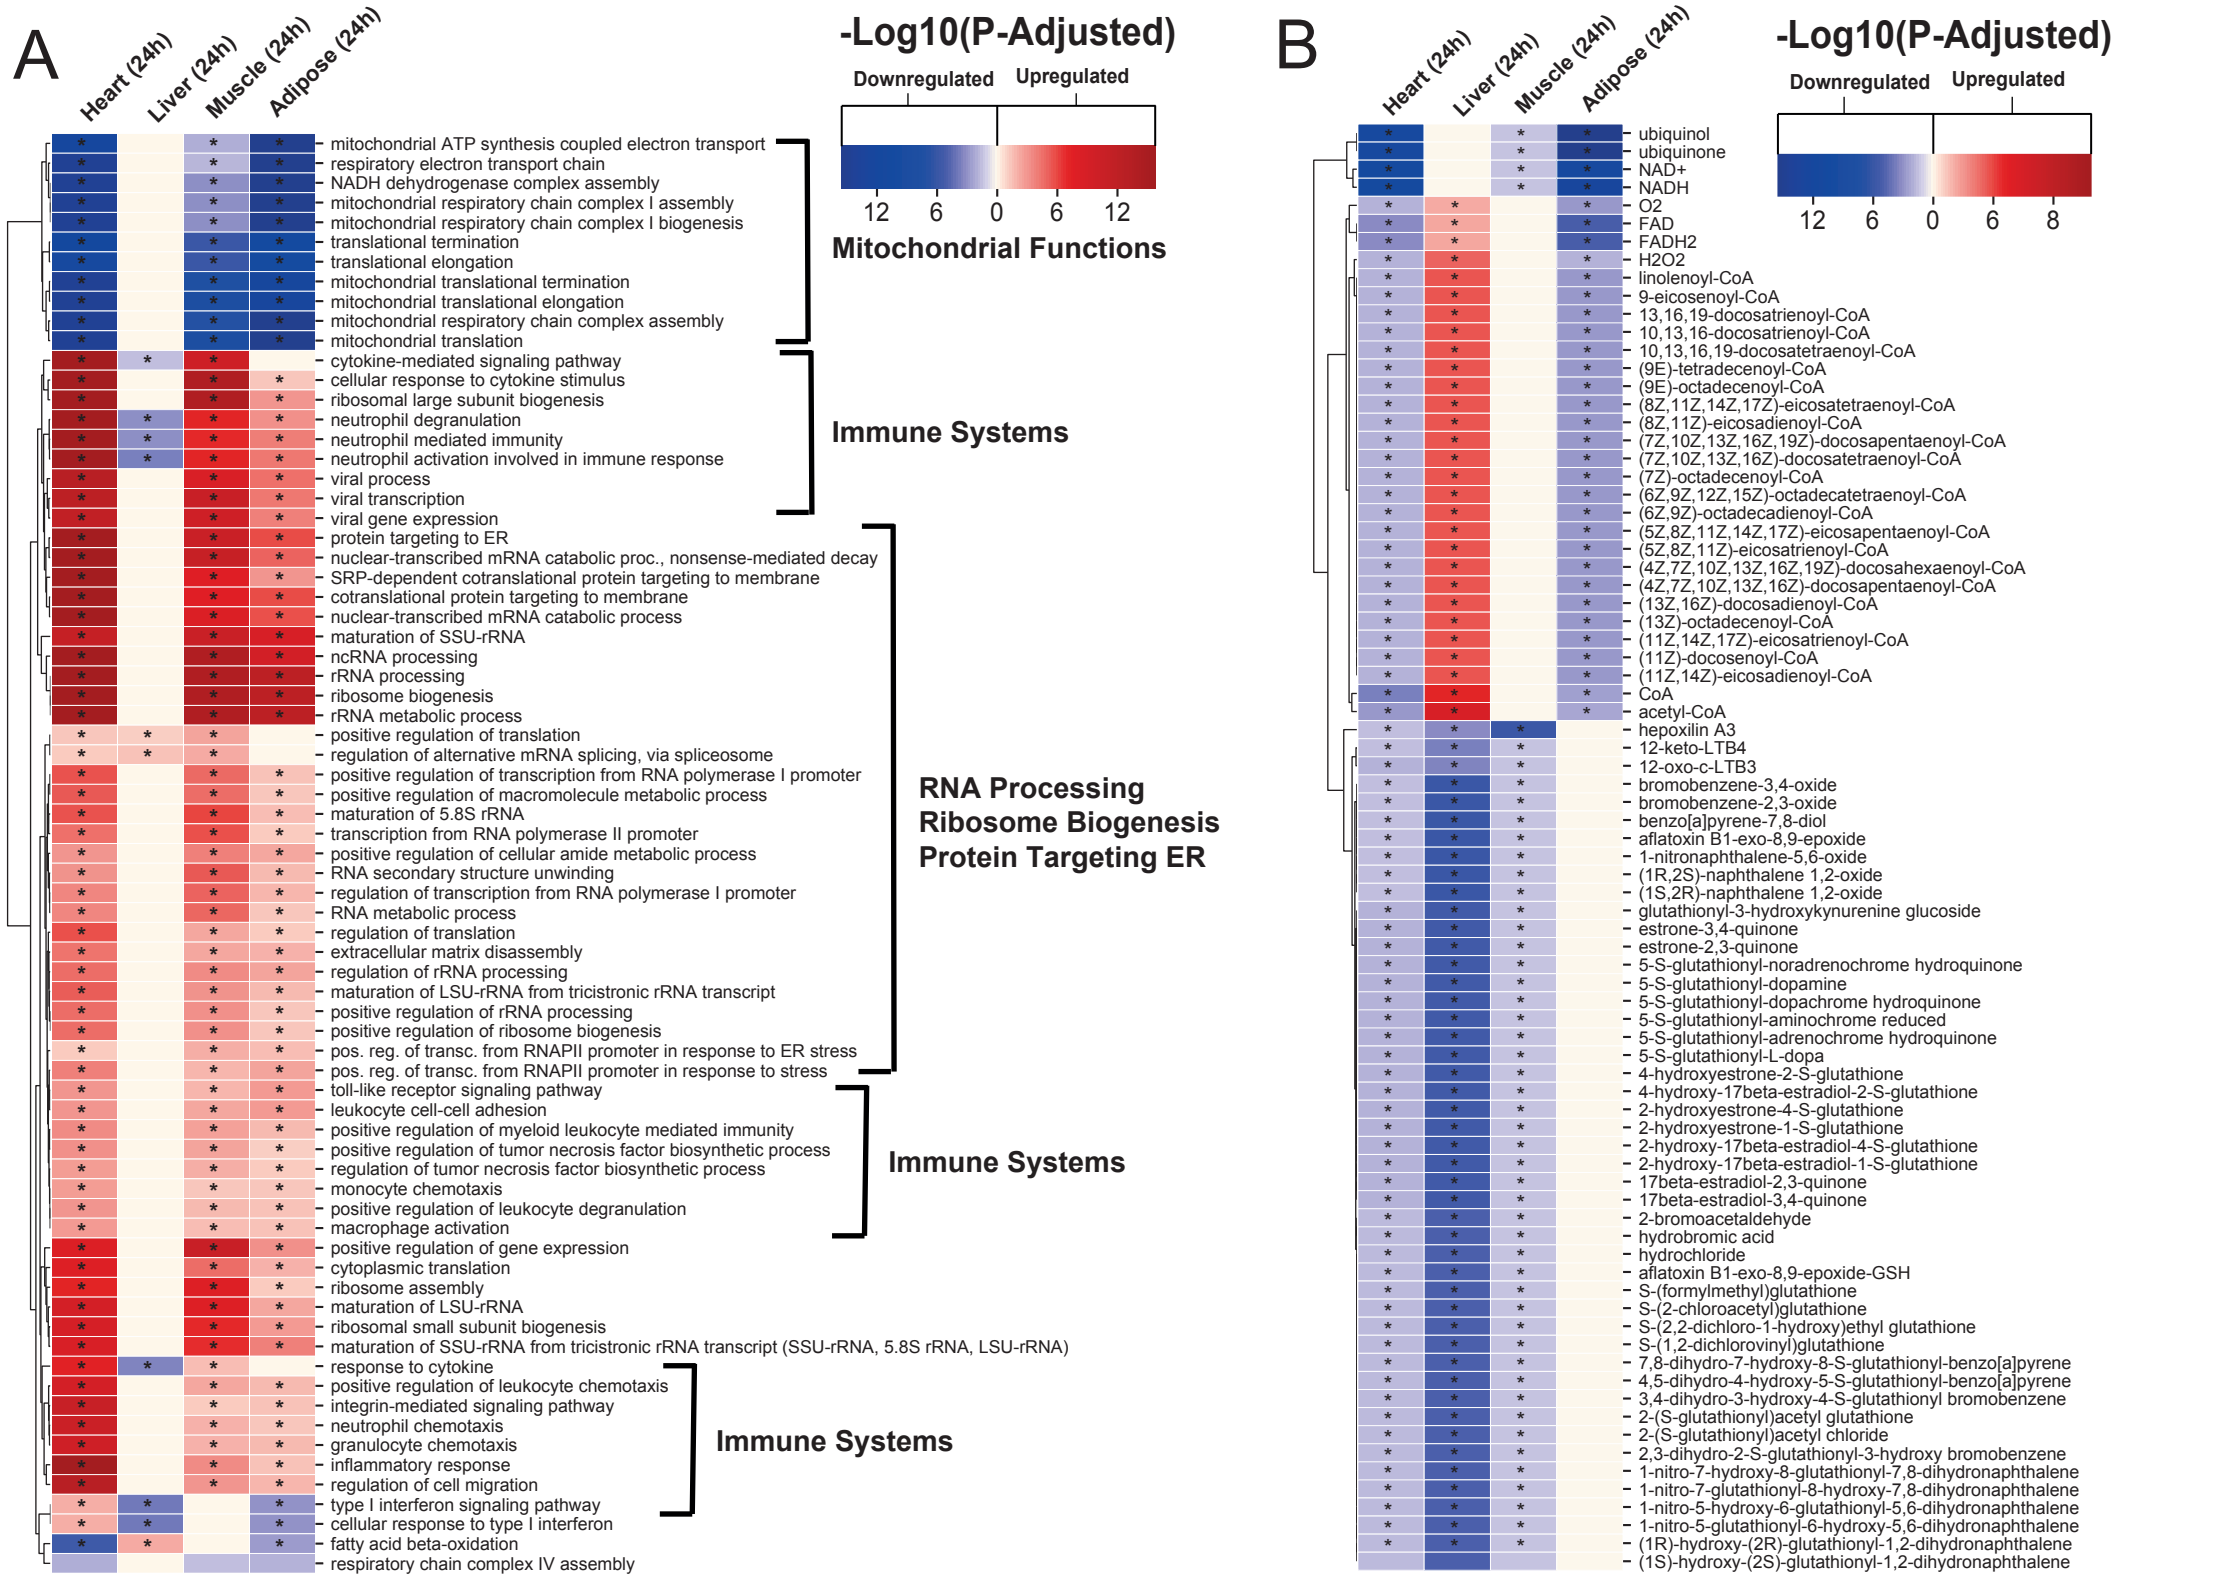

**Figure 2** (A) Functional analysis with GO (FDR < 0.05% in at least 3 tissues) revealed that 944 (919 upregulated) and 1019 (970 upregulation) BPs are significantly altered in heart 6 and 24 h after infarction, respectively. The results also showed 38 (16 upregulated), 376 (357 upregulated) and 193 (116 upregulated) BPs are significantly altered 24 h after infarction in liver, muscle and adipose, respectively. Most tissues show significant alterations in multiple biological processes, including mitochondrial functions, RNA processes, cell adhesion, ribosome and immune systems. The results of this analysis showed alterations concordant with those observed for KEGG pathways. (B) Reporter metabolites analysis shows significant alteration in important metabolites. Our analysis revealed that 169, 324, 118 and 51 reporter metabolites are significantly altered in heart, liver, skeletal muscle and adipose tissues, respectively, at 24 h post-infarction (Table S4)

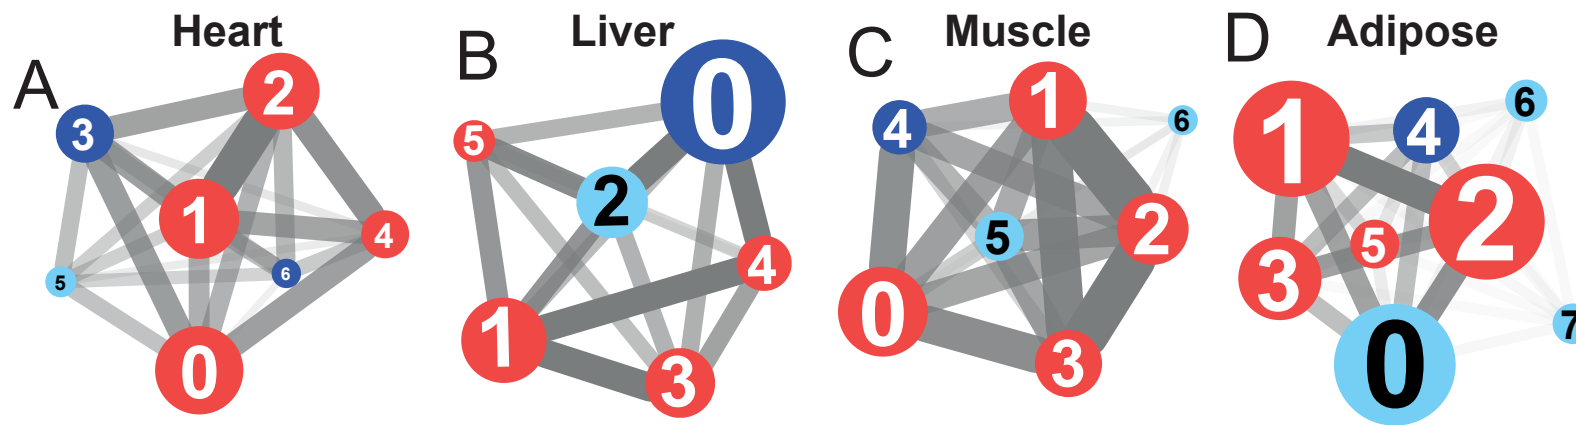

**E** Reg. of transcription from RNAP-II mRNA Processing      Regulation of Mitotic Cell Cycle Phase Ubiquitin-dependent Protein Catabolic Process

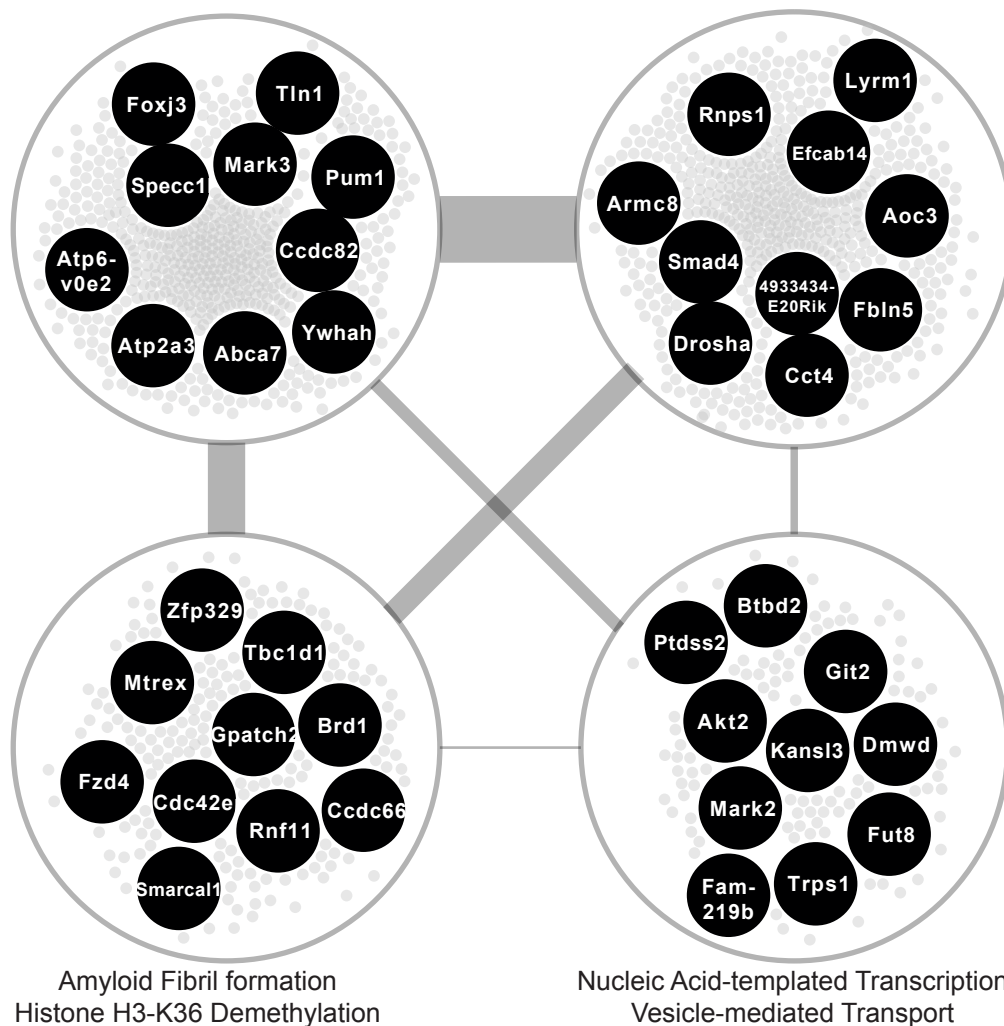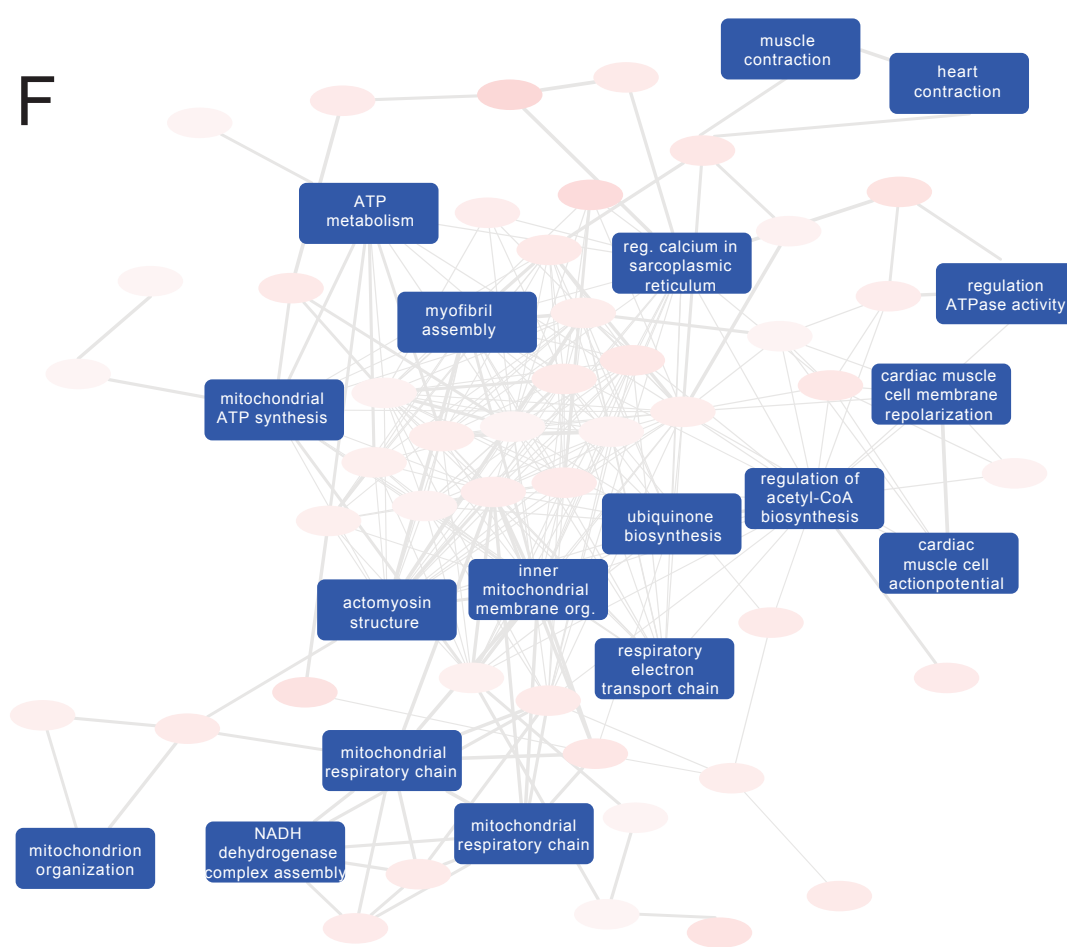

**Figure 3** Network analyses. (A) Heart co-expression network clusters with superimposed DEGs 24 h post-infarction (Blue = down-regulated, Red = up-regulated) marked with the cluster numbers. The edges between the clusters were aggregation of the inter-cluster edges (B) Liver. (C) Muscle. (D) Adipose. (E) Intersection of the most central clusters in all tissues shows that the central architecture of the network was conserved in all tissues. We found 4 sub-clusters within the network intersection. Top 10 most connected genes are marked in black. (F) Enriched GO BP in heart-specific cluster generated by Revigo.

**A**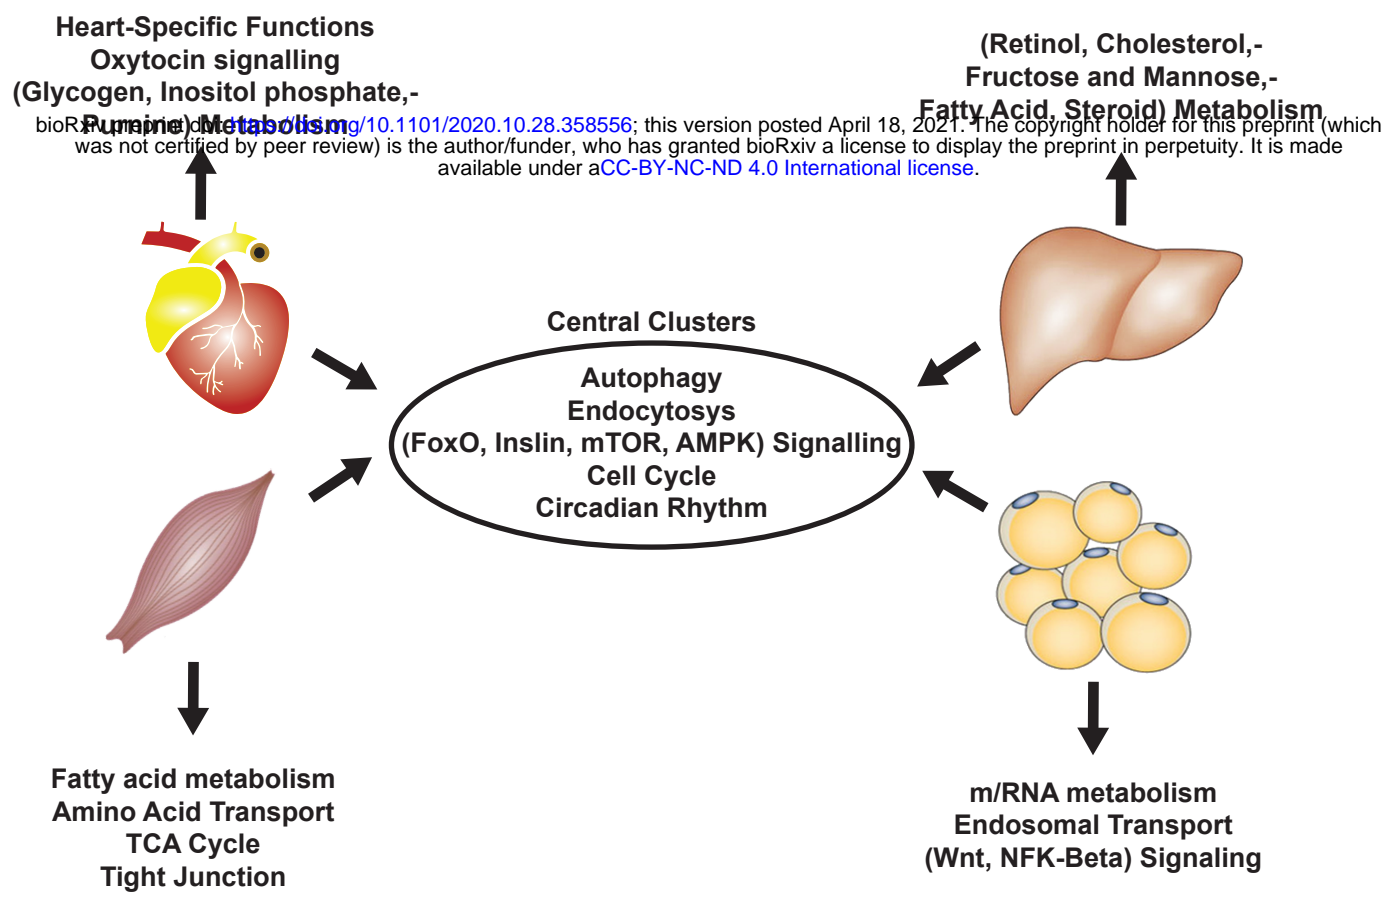**B**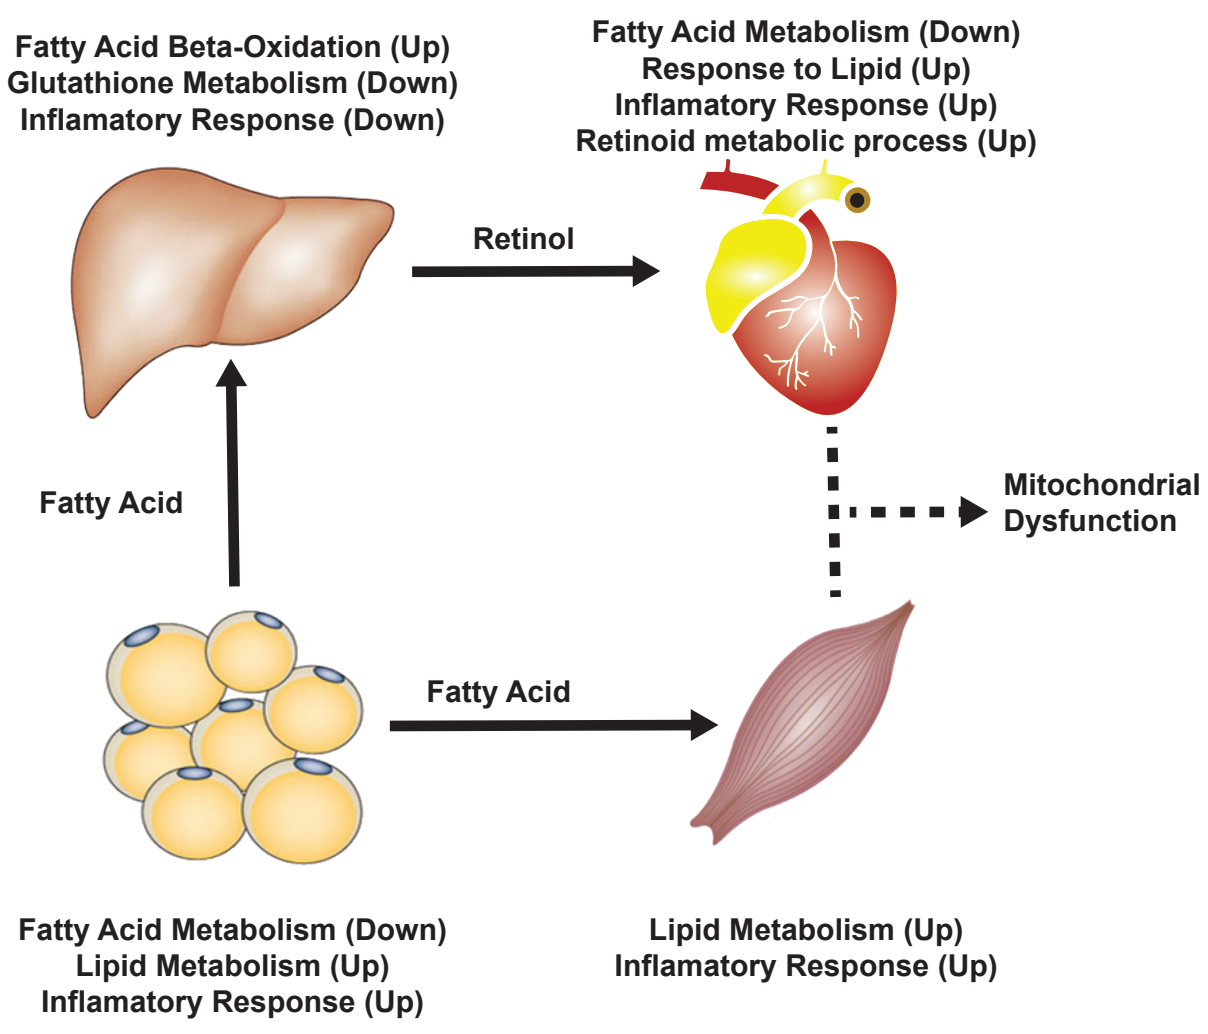

**Figure 4** (A) Similarity of functions in the most central cluster and specific functions of each tissue-specific cluster. (B) Functional analysis for each tissue and hypothesized flow of metabolites



A

bioRxiv preprint doi: <https://doi.org/10.1101/2020.10.28.358556>; this version posted April 18, 2021. The copyright holder for this preprint (which was not certified by peer review) is the author/funder, who has granted bioRxiv a license to display the preprint in perpetuity. It is made available under a [CC-BY-NC-ND 4.0 International license](https://creativecommons.org/licenses/by-nc-nd/4.0/).

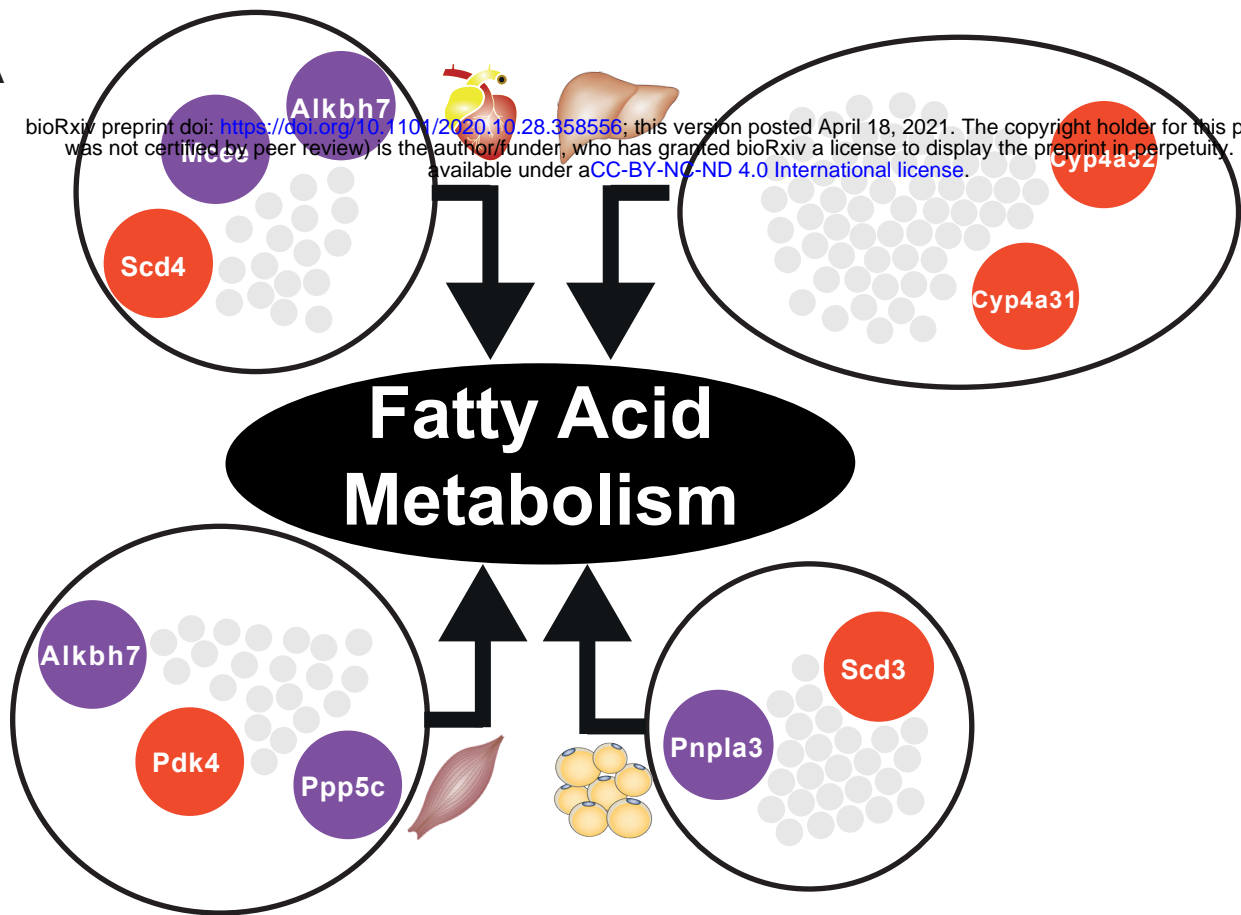

B

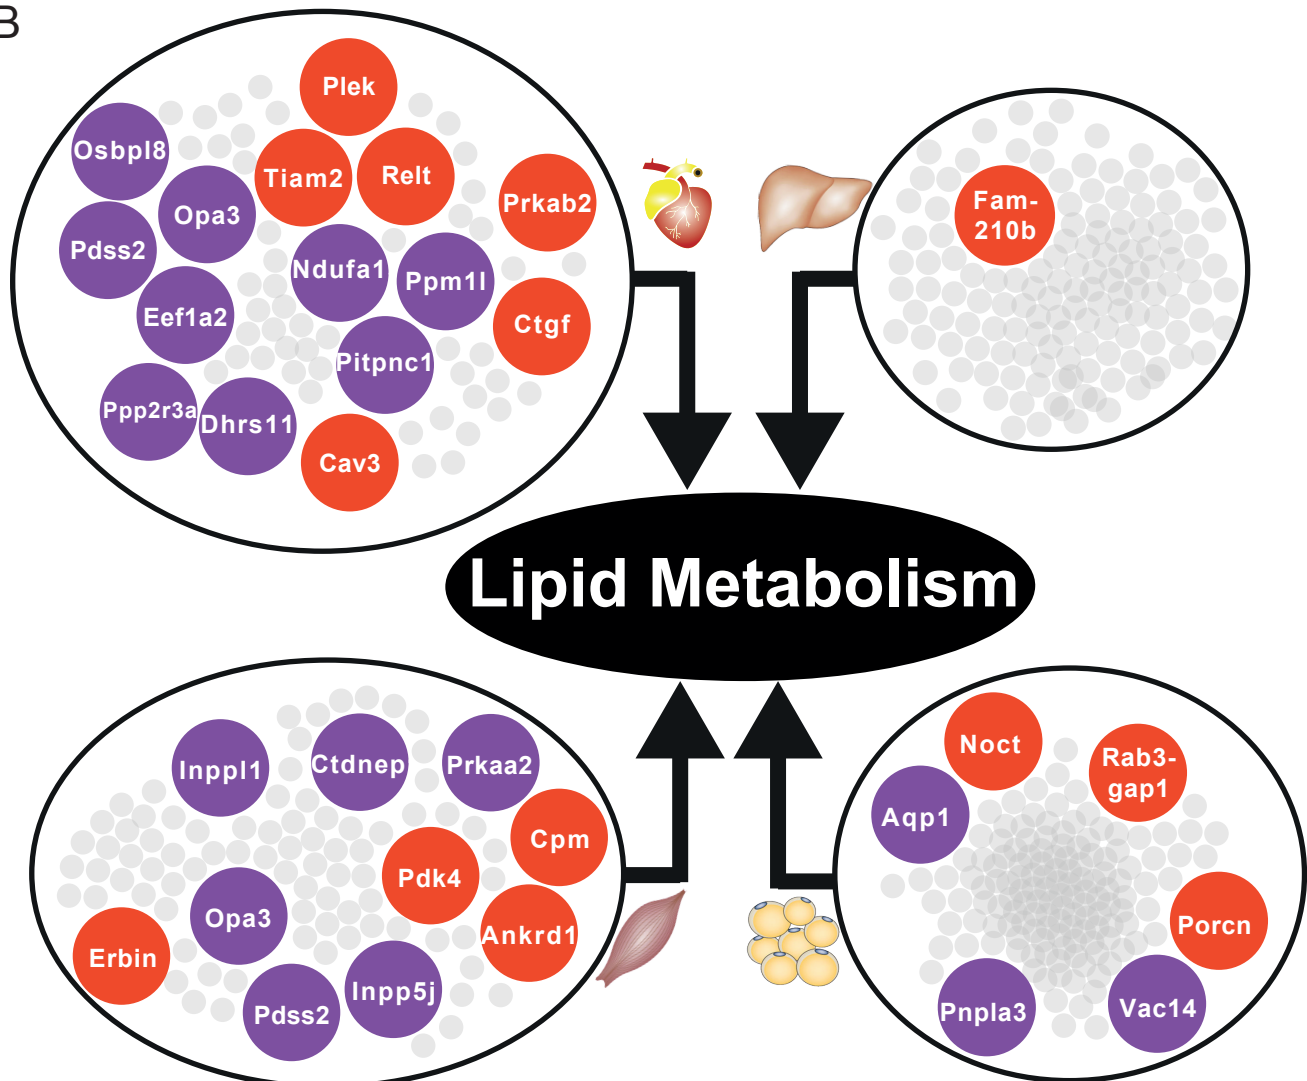

**Figure 5** (A) Significantly differentially expressed central genes of each tissue-specific cluster to fatty acid metabolism, as one of the most affected metabolic process. (B) Lipid metabolism. Red = upregulated, blue = downregulated.

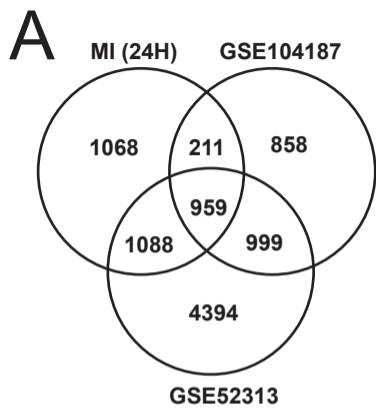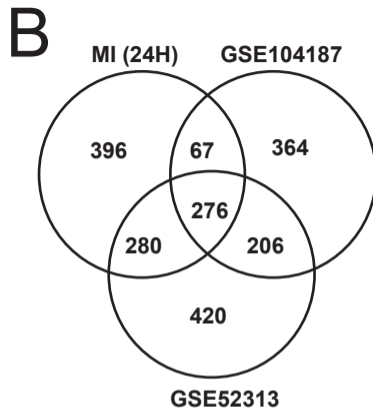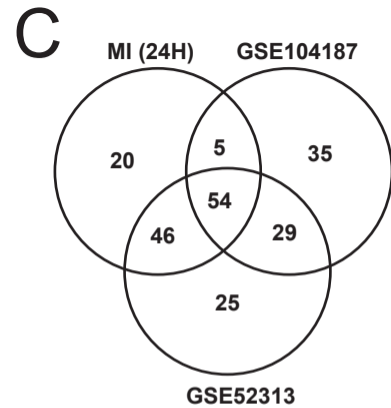

**Figure 6** (A) DEGs intersection of our data and validation cohort (B) & (C) Intersection of functional analysis results (GO BP and KEGG Pathways) of our data and validation cohort

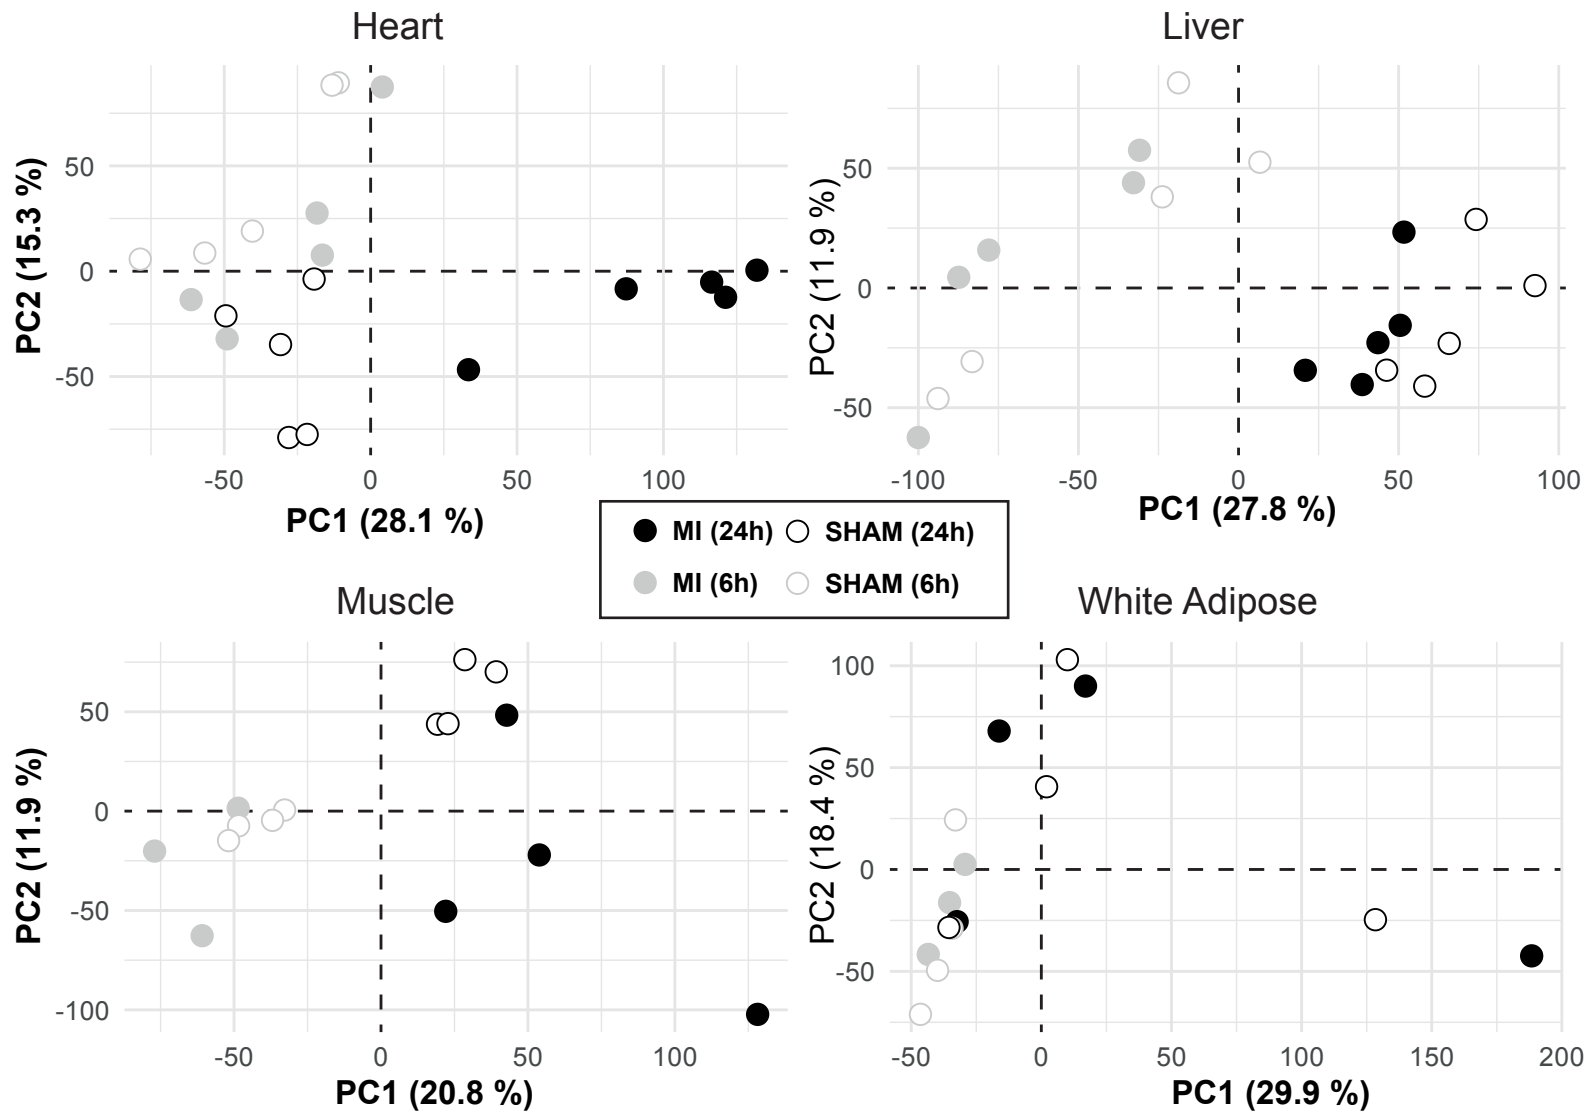

**Figure 1 - Figure Supplement 1**  
**Data Exploration of the Samples**

PCA plots of each tissue showing data from mice 6 and 24 h after an MI or sham operation. The plot showed that heart was affected the most by the change in conditions and the rest were most affected by time shifts..



# -Log<sub>10</sub>(P-Adjusted)

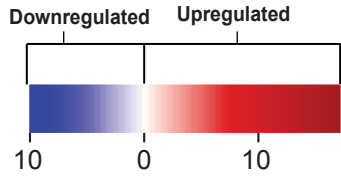

bioRxiv preprint doi: <https://doi.org/10.1101/2020.10.28.358556>; this version posted April 8, 2021. The copyright holder for this preprint (which was not certified by peer review) is the author/funder, who has granted bioRxiv a license to display the preprint in perpetuity. It is made available under aCC-BY-NC-ND 4.0 International license.

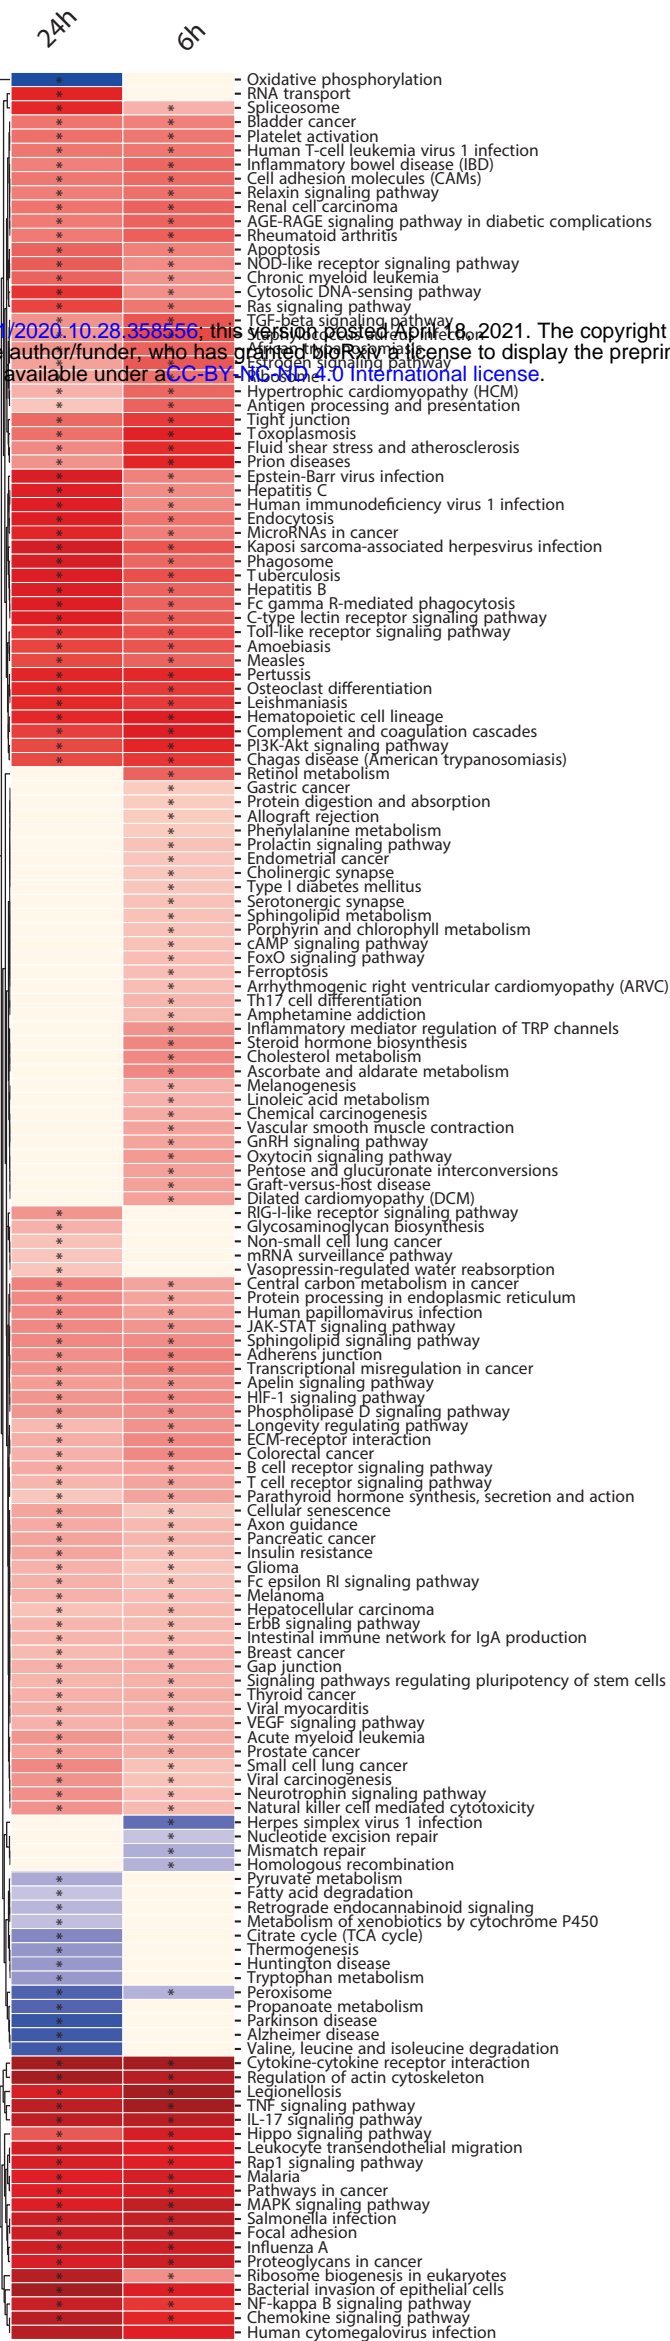

Figure 1 - Figure Supplement 2  
KEGG pathway analysis results for Heart 6- and 24- hours post MI

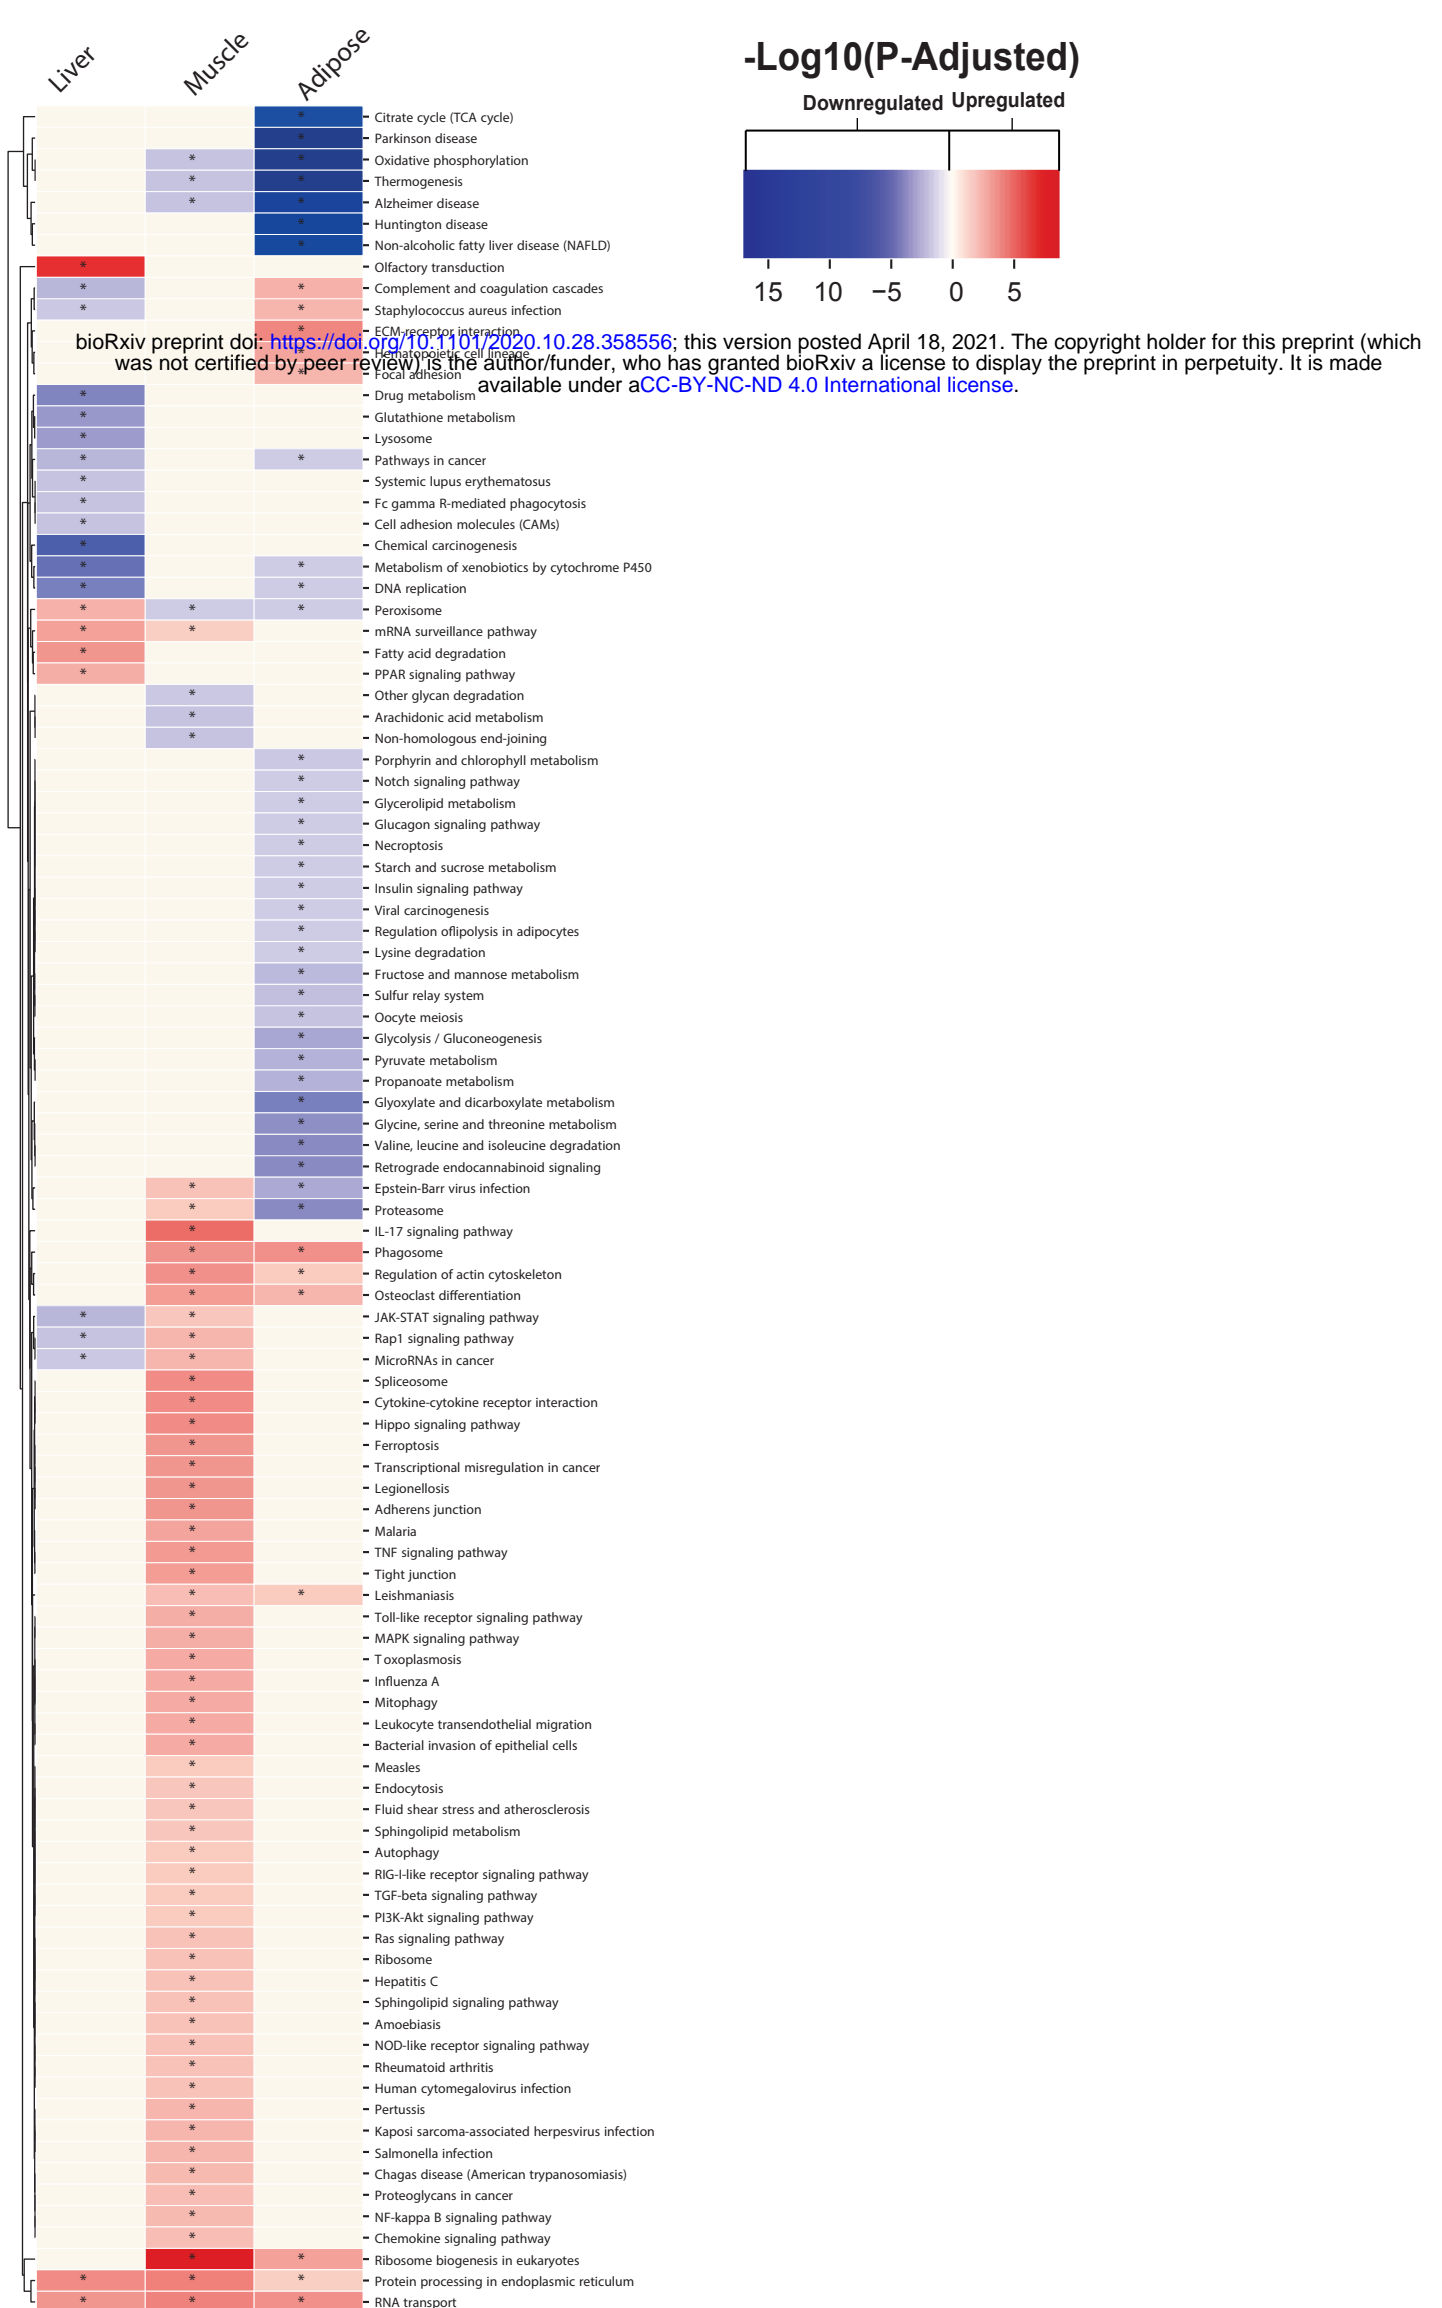

Figure 1 - Figure Supplement 3  
KEGG pathway analysis results for each tissue  
post MI.

Liver, Muscle, and Adipose tissue 24 hours

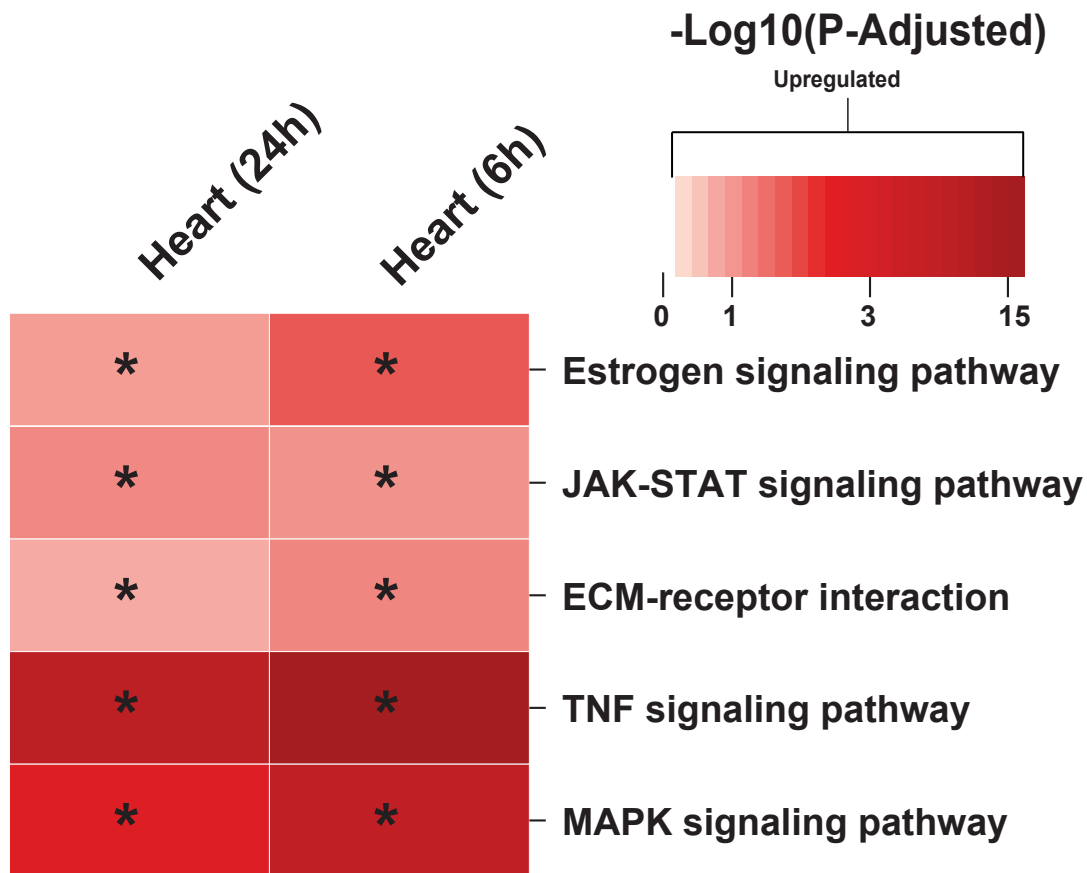

**Figure 1 - Figure Supplement 4**  
**KEGG pathways related to cardiac problems show activation after an MI.**

cGMP-PKG SIGNALING PATHWAY

bioRxiv preprint doi: <https://doi.org/10.1101/2020.10.28.358556>; this version posted April 18, 2021. The copyright holder for this preprint (which was not certified by peer review) is the author/funder, who has granted bioRxiv a license to display the preprint in perpetuity. It is made available under aCC-BY-NC-ND 4.0 International license.

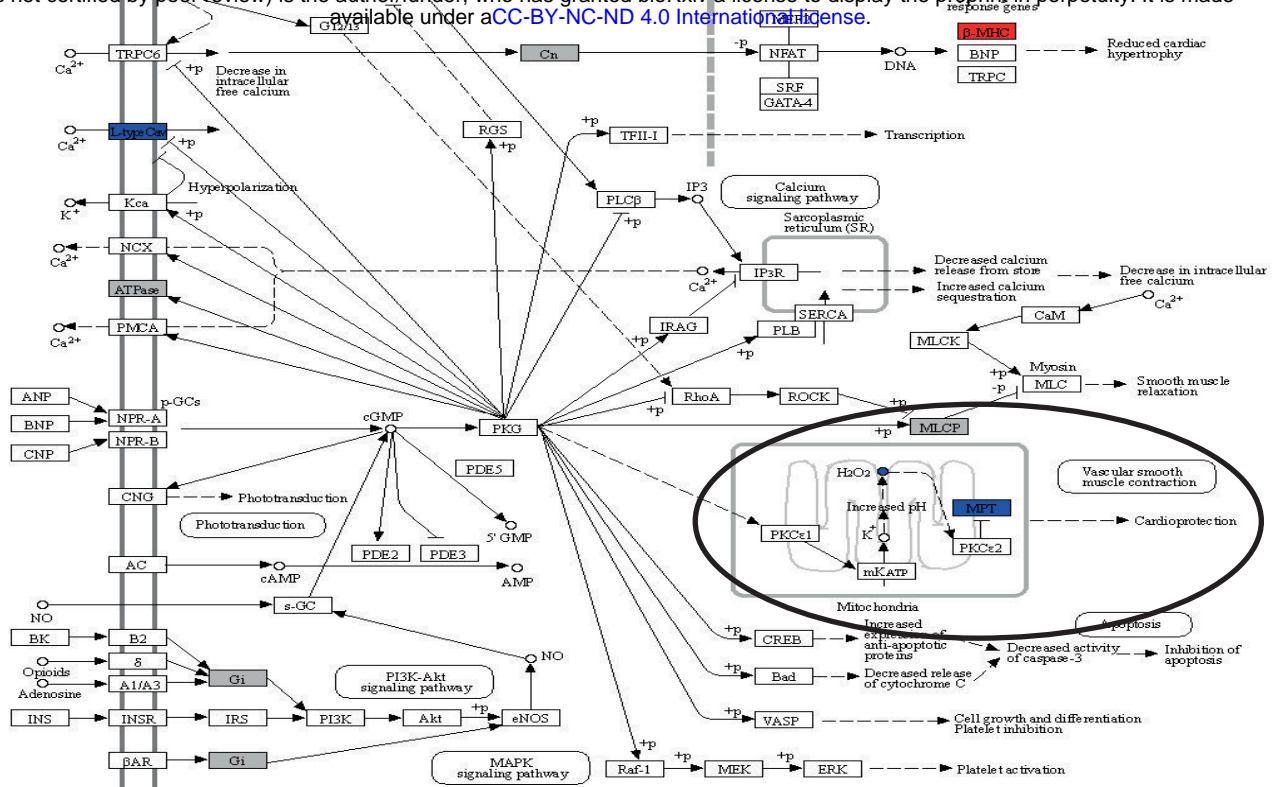

04022 6/4/19  
(c) Kanehisa Laboratories

**Figure 4 - Figure Supplement 1**  
cGMP-PKG with overlay data from differential expression and reporter metabolites analysis.

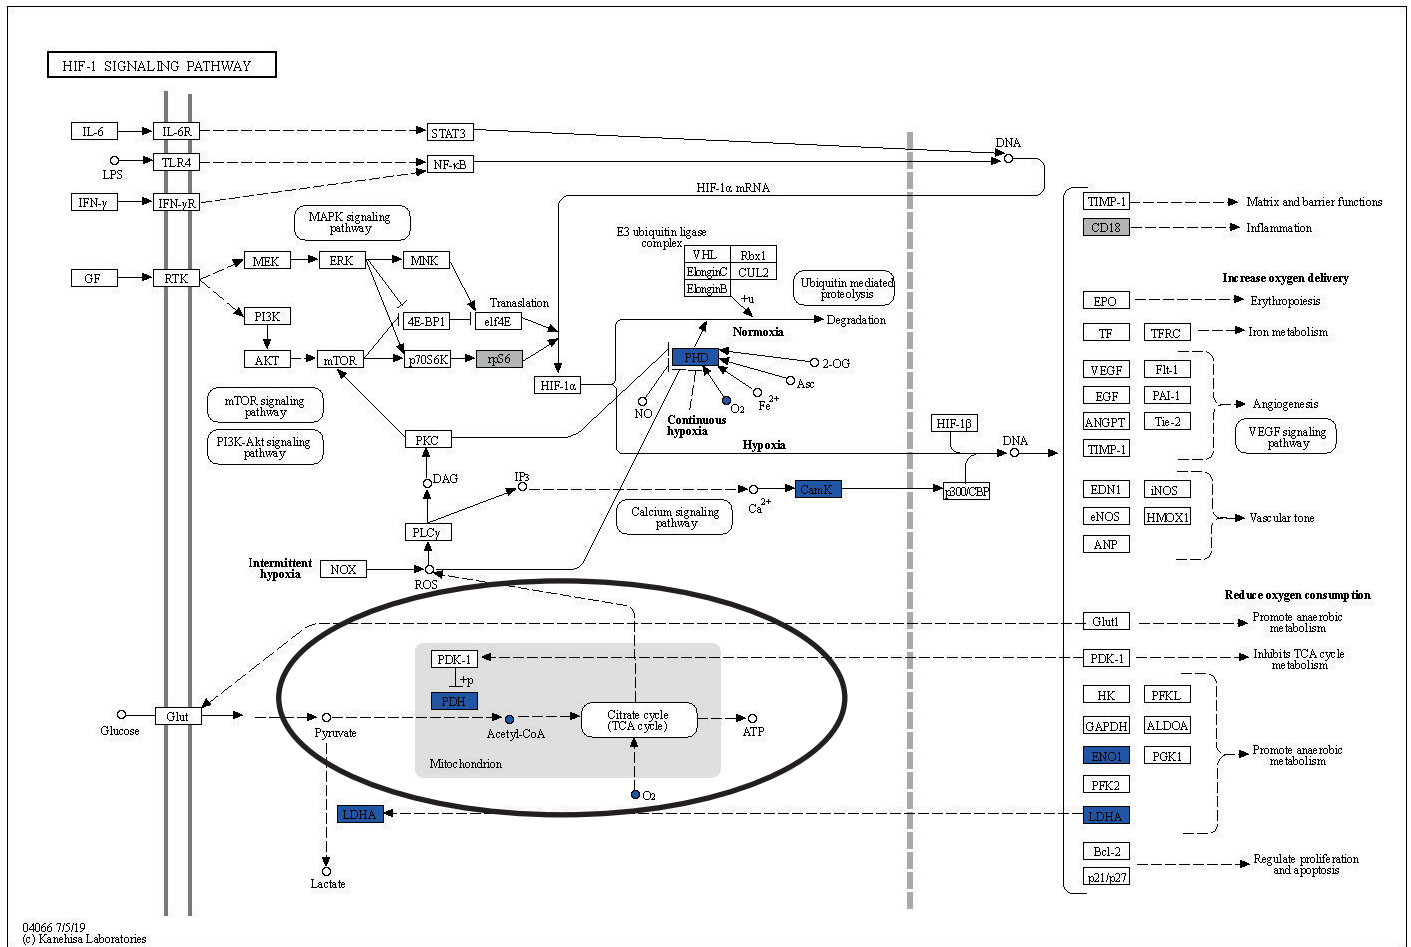

**Figure 4 - Figure Supplement 2**  
**HIF-1 signaling pathway with overlay data from differential expression and reporter metabolites analysis.**
